# Supplementary material for: Base-promoted cyclization ofortho-hydroxyacetophenones within situgenerated cyclopropenes: diastereoselective access to spirobenzo[b]oxepines and related precursors
Source: Royal Society of Chemistry journal article supplement (doi:10.1039/d3ob00077j), 2023-01-01

## **Base-promoted cyclization of *ortho*-hydroxyacetophenones with in situ generated cyclopropenes: diastereoselective access to spirobenzo[*b*]oxepines and related precursors**

Meher Prakash and Sampak Samanta\*

Department of Chemistry, Indian Institute of Technology Indore, Simrol, Indore-453552, Madhya Pradesh, India.

### **Table of contents**

|                                                                                  |                |
|----------------------------------------------------------------------------------|----------------|
| <b>Single crystal data of compounds 3aa and 5ba.....</b>                         | <b>S2-S5</b>   |
| <b>Copies of <sup>1</sup>H and <sup>13</sup>C NMR of compounds 3aa-3ai.....</b>  | <b>S6-S38</b>  |
| <b>Copies of <sup>19</sup>F NMR of compounds 3ag, 3ad, 3cd and 3jd.....</b>      | <b>S6-S38</b>  |
| <b>Copies of <sup>1</sup>H and <sup>13</sup>C NMR of compounds 3aa'-3aj.....</b> | <b>S39-S42</b> |
| <b>Copies of <sup>1</sup>H and <sup>13</sup>C NMR of compounds 5aa-5ka.....</b>  | <b>S43-S45</b> |
| <b>Copies of <sup>1</sup>H and <sup>13</sup>C NMR of compounds 4aa-4ag.....</b>  | <b>S46-S52</b> |
| <b>Copies of <sup>1</sup>H and <sup>13</sup>C NMR of compounds 1a-2j.....</b>    | <b>S53-S65</b> |

**Crystallographic data:** Single crystal X-ray structural of compound **3aa** was measured on the SuperNova, Dual, Mo at home/near, Eos- XRD at 150(2) K using graphite monochromated Mo K $\alpha$  radiation ( $\lambda = 0.71073$  Å). The strategy for the Data collection was evaluated by using the CrysAlisPro CCD software. The data were collected by the standard 'phi-omega scan techniques, and were scaled and reduced using CrysAlisPro RED software. The structure was solved by direct methods using SHELXS-97, and refined by full matrix least-squares with SHELXL-97, refining on *F*<sup>2</sup>. The positions of all the atoms were obtained by direct methods. All non-hydrogen atoms were refined anisotropically. The remaining hydrogen atoms were placed in geometrically constrained positions, and refined with isotropic temperature factors, generally 1.2*U*<sub>eq</sub> of their parent atoms. The crystal data are summarized in Table S1. The **CCDC number 2233544**) can be obtained free of charge via [www.ccdc.cam.ac.uk](http://www.ccdc.cam.ac.uk) (or from the Cambridge Crystallographic Data Centre, 12 union Road, Cambridge CB21 EZ, UK; Fax: (+44) 1223-336-033; or [deposit@ccdc.cam.ac.uk](mailto:deposit@ccdc.cam.ac.uk)).

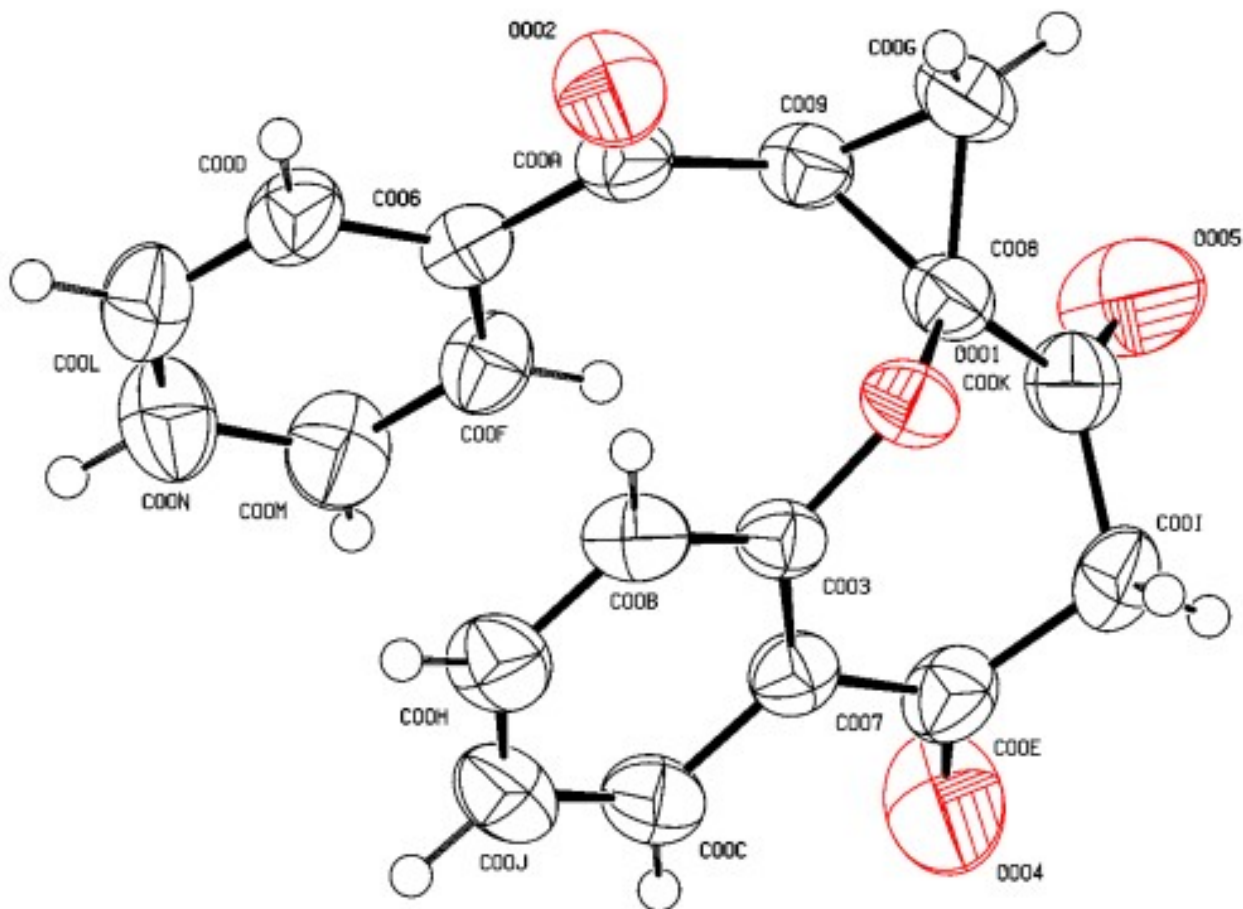

**Figure S1.** ORTEP diagram of compound **3aa**(CCDC 2233544), thermal ellipsoids drawn at the 50% probability level.

**Table S1. Crystal data for compound 3aa.**

|                                                  |                                                               |
|--------------------------------------------------|---------------------------------------------------------------|
| Compound                                         | <b>3aa</b>                                                    |
| Empirical formula                                | C <sub>19</sub> H <sub>14</sub> O <sub>4</sub>                |
| Formula weight                                   | 306.32                                                        |
| Temperature                                      | 293 K                                                         |
| Wave length (Å)                                  | 0.71073 Å                                                     |
| Crystal system, space group                      | Triclinic, P -1                                               |
| <i>a</i> (Å)                                     | <i>a</i> = 8.5674(6) Å                                        |
| <i>b</i> (Å)                                     | <i>b</i> = 9.4995(7) Å                                        |
| <i>c</i> (Å)                                     | <i>c</i> = 9.9500(7) Å                                        |
| $\alpha$ (°)                                     | $\alpha$ = 85.100(6) deg.                                     |
| $\beta$ (°)                                      | $\beta$ = 81.305(6) deg.                                      |
| $\gamma$ (°)                                     | $\gamma$ = 68.735(7) deg.                                     |
| Volume (Å <sup>3</sup> )                         | 745.57(10) Å <sup>3</sup>                                     |
| Z, Calculated density (mg/m <sup>3</sup> )       | 2, 1.364 Mg/m <sup>3</sup>                                    |
| Absorption coefficient (mm <sup>-1</sup> )       | 0.096 mm <sup>-1</sup>                                        |
| F(000)                                           | 320.224                                                       |
| $\Theta$ range (deg)                             | 3.7130 to 28.8090 deg.                                        |
| Limiting indices                                 | -11 ≤ <i>h</i> ≤ 10, -11 ≤ <i>k</i> ≤ 12, -11 ≤ <i>l</i> ≤ 13 |
| Reflections collected / unique                   | 6876 / 3484 [R(int) = 0.0307]                                 |
| Completeness to $\Theta = 25.242$                | 99.8 %                                                        |
| Max. and min. transmission                       | 1.00000 and 0.40828                                           |
| Absorption correction                            | none                                                          |
| Data / restraints / parameters                   | 3484 / 0 / 209                                                |
| Goodness-of-fit on F <sup>2</sup>                | 1.0415                                                        |
| Final R indices [I > 2σ(I)]                      | R1 = 0.0575, wR2 = 0.1447                                     |
| R indices (all data)                             | R1 = 0.0719, wR2 = 0.1533                                     |
| Extinction coefficient                           | n/a                                                           |
| Largest diff. peak and hole (e.Å <sup>-3</sup> ) | 0.2762 and -0.2872 e.Å <sup>-3</sup>                          |
| CCDC                                             | <b>2233544</b>                                                |

**Crystallographic data:** Single crystal X-ray structural of compound **5ba** was measured on the SuperNova, Dual, Mo at home/near, Eos- XRD at 150(2) K using graphite monochromated Mo K $\alpha$  radiation ( $\lambda = 0.71073$  Å). The strategy for the Data collection was evaluated by using the CrysAlisPro CCD software. The data were collected by the standard 'phi-omega scan techniques, and were scaled and reduced using CrysAlisPro RED software. The structure was solved by direct methods using SHELXS-97, and refined by full matrix least-squares with SHELXL-97, refining on  $F^2$ . The positions of all the atoms were obtained by direct methods. All non-hydrogen atoms were refined anisotropically. The remaining hydrogen atoms were placed in geometrically constrained positions, and refined with isotropic temperature factors, generally  $1.2U_{eq}$  of their parent atoms. The crystal data are summarized in Table S2. The **CCDC** number of compound **5ba**: **2239029**) can be obtained free of charge via [www.ccdc.cam.ac.uk](http://www.ccdc.cam.ac.uk) (or from the Cambridge Crystallographic Data Centre, 12 union Road, Cambridge CB21 EZ, UK; Fax: (+44) 1223-336-033; or [deposit@ccdc.cam.ac.uk](mailto:deposit@ccdc.cam.ac.uk)).

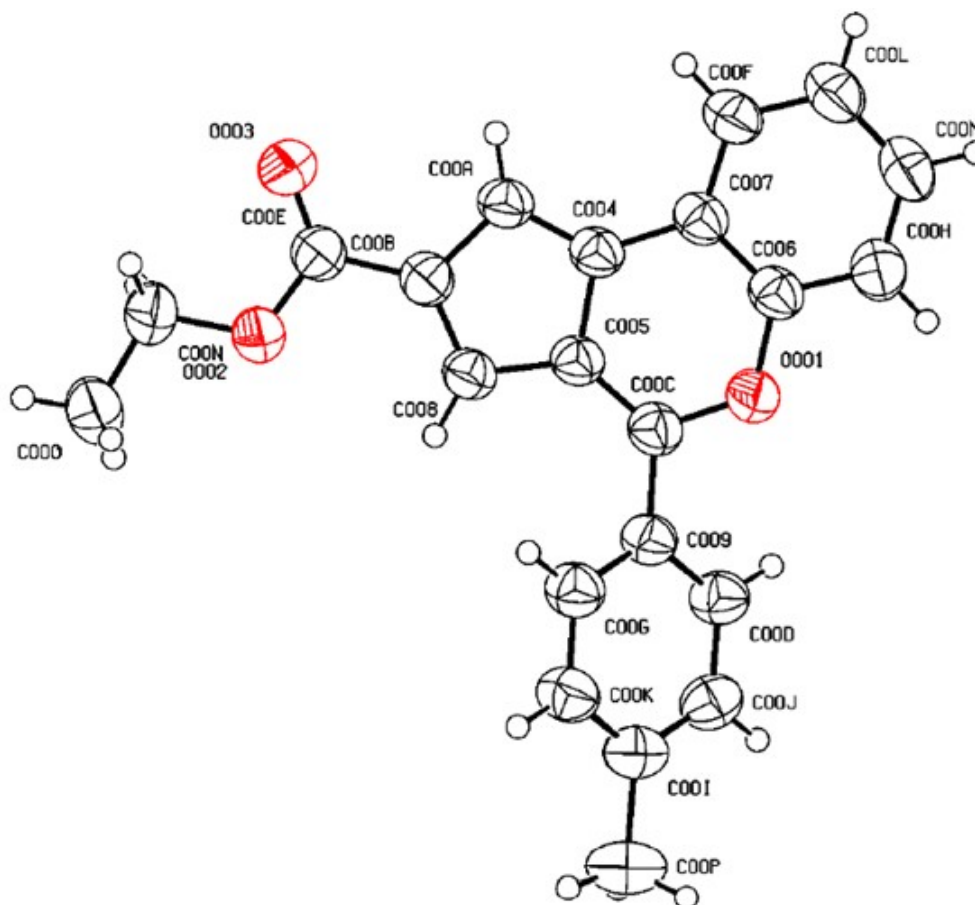

**Figure S2** . ORTEP diagram of compound **5ba**, thermal ellipsoids drawn at the 50% probability level.

**Table S2. Crystal data for compound 5ba.**

| Compound                                         | 5ba                                                           |
|--------------------------------------------------|---------------------------------------------------------------|
| Empirical formula                                | C <sub>22</sub> H <sub>18</sub> O <sub>3</sub>                |
| Formula weight                                   | 330.39                                                        |
| Temperature                                      | 293 K                                                         |
| Wave length (Å)                                  | 0.71073 Å                                                     |
| Crystal system, space group                      | Monoclinic, C 1 2/c 1                                         |
| <i>a</i> (Å)                                     | <i>a</i> = 11.8421(3) Å                                       |
| <i>b</i> (Å)                                     | <i>b</i> = 14.4124(5) Å                                       |
| <i>c</i> (Å)                                     | <i>c</i> = 20.4372(7) Å                                       |
| $\alpha$ (°)                                     | $\alpha$ = 90 deg.                                            |
| $\beta$ (°)                                      | $\beta$ = 101.814(3) deg.                                     |
| $\gamma$ (°)                                     | $\gamma$ = 90 deg.                                            |
| Volume (Å <sup>3</sup> )                         | 3414.19(19) Å <sup>3</sup>                                    |
| Z, Calculated density (mg/m <sup>3</sup> )       | 8, 1.286 Mg/m <sup>3</sup>                                    |
| Absorption coefficient (mm <sup>-1</sup> )       | 0.680 mm <sup>-1</sup>                                        |
| F(000)                                           | 1396.638                                                      |
| $\Theta$ range (deg)                             | 4.42 to 71.66 deg.                                            |
| Limiting indices                                 | -14 ≤ <i>h</i> ≤ 14, -12 ≤ <i>k</i> ≤ 17, -23 ≤ <i>l</i> ≤ 25 |
| Reflections collected / unique                   | 12340 / 3284 [R(int) = 0.0996]                                |
| Completeness to $\Theta = 25.242$                | 97.9 %                                                        |
| Max. and min. transmission                       | 1.00000 and 0.25768                                           |
| Absorption correction                            | none                                                          |
| Data / restraints / parameters                   | 2308 / 0 / 229                                                |
| Goodness-of-fit on F <sup>2</sup>                | 1.0358                                                        |
| Final R indices [ <i>I</i> > 2σ( <i>I</i> )]     | R1 = 0.0690, wR2 = 0.2176                                     |
| R indices (all data)                             | R1 = 0.0876, wR2 = 0.1824                                     |
| Extinction coefficient                           | n/a                                                           |
| Largest diff. peak and hole (e.Å <sup>-3</sup> ) | 0.3462 and -0.2904 e.Å <sup>-3</sup>                          |
| CCDC                                             | <b>2239029</b>                                                |

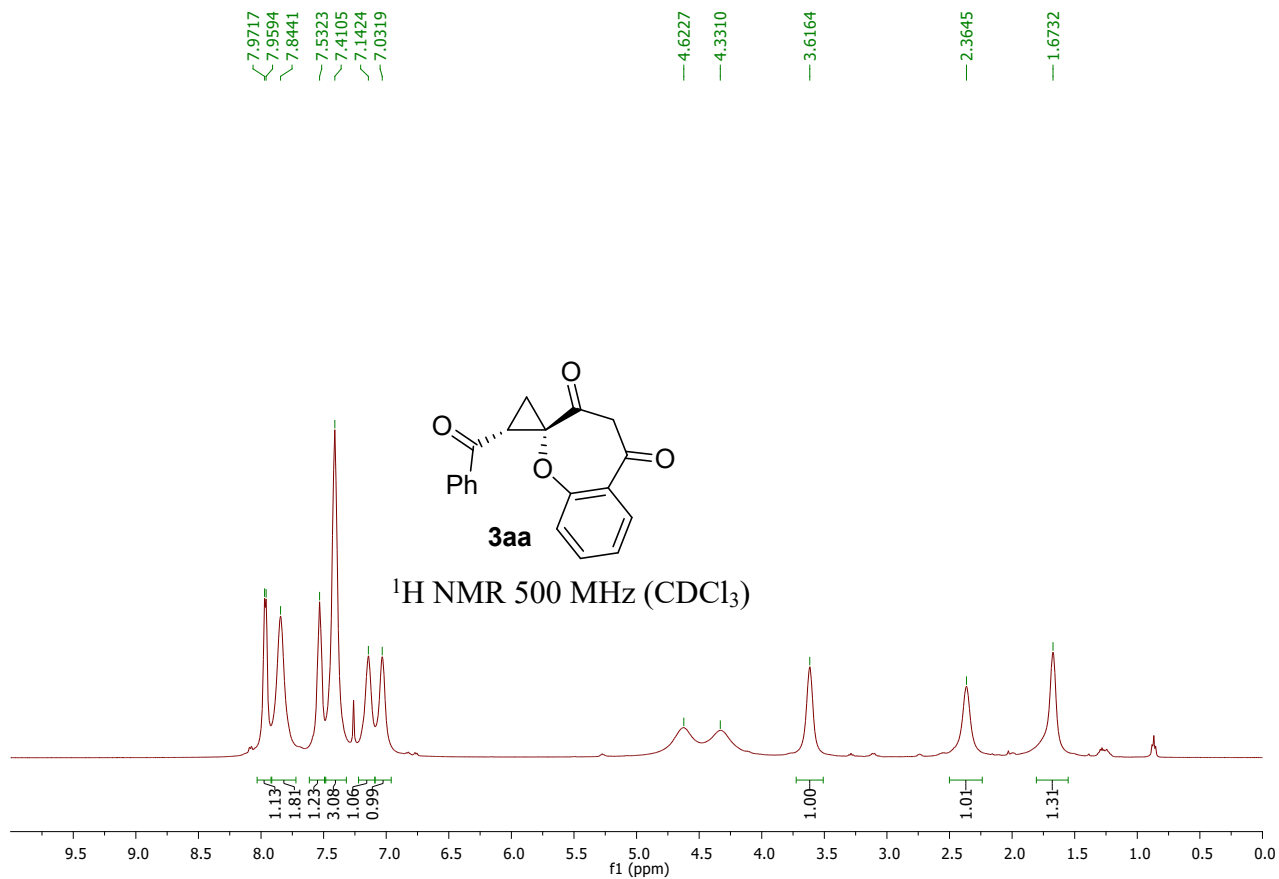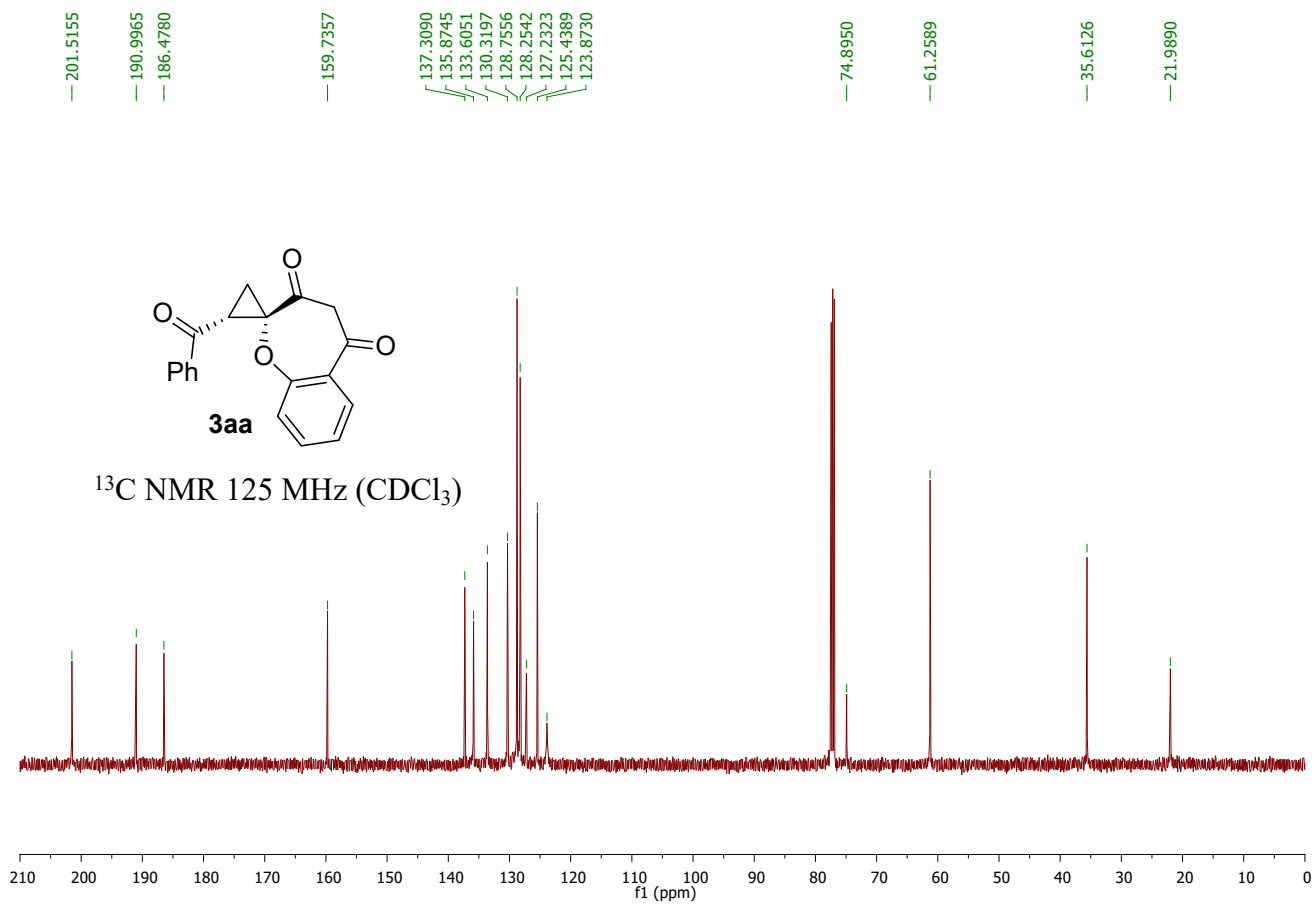

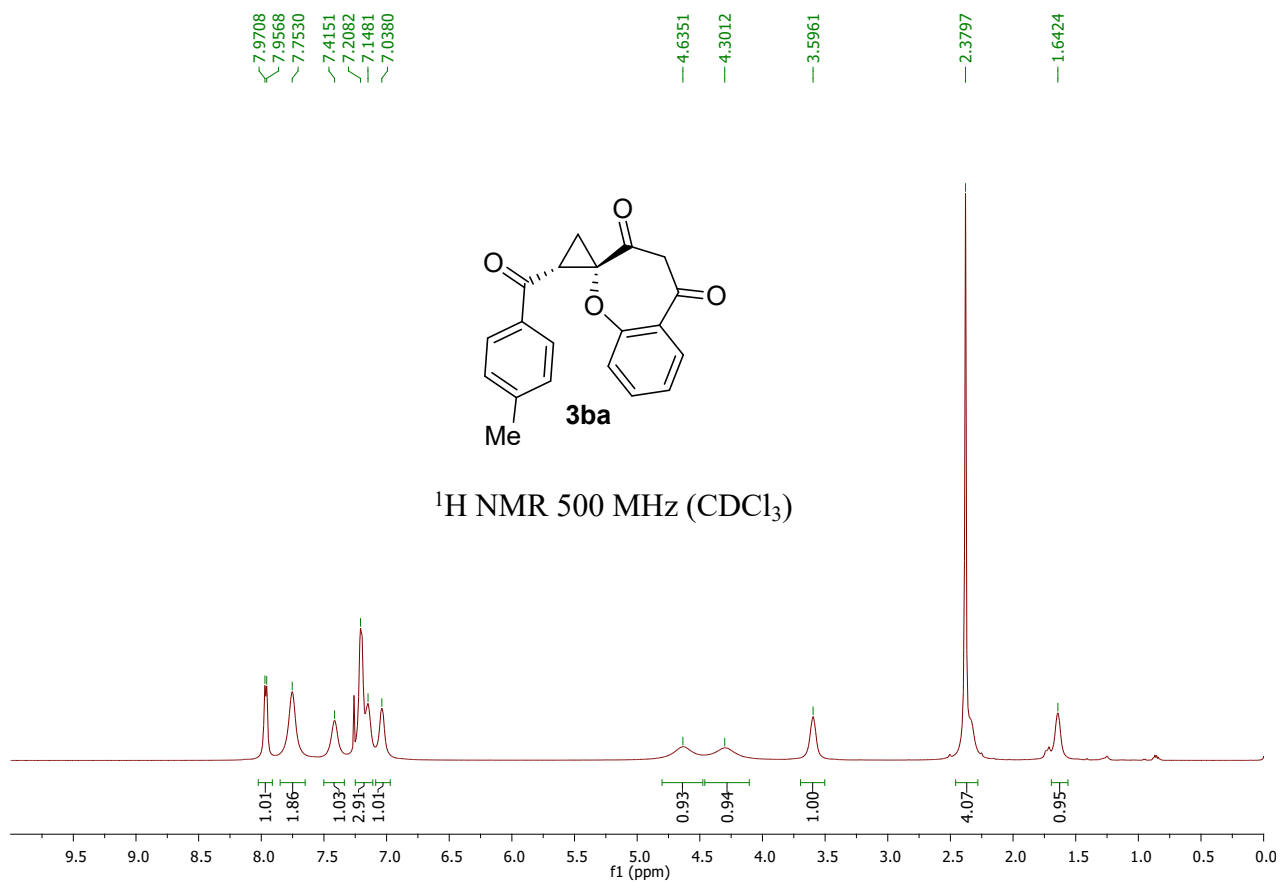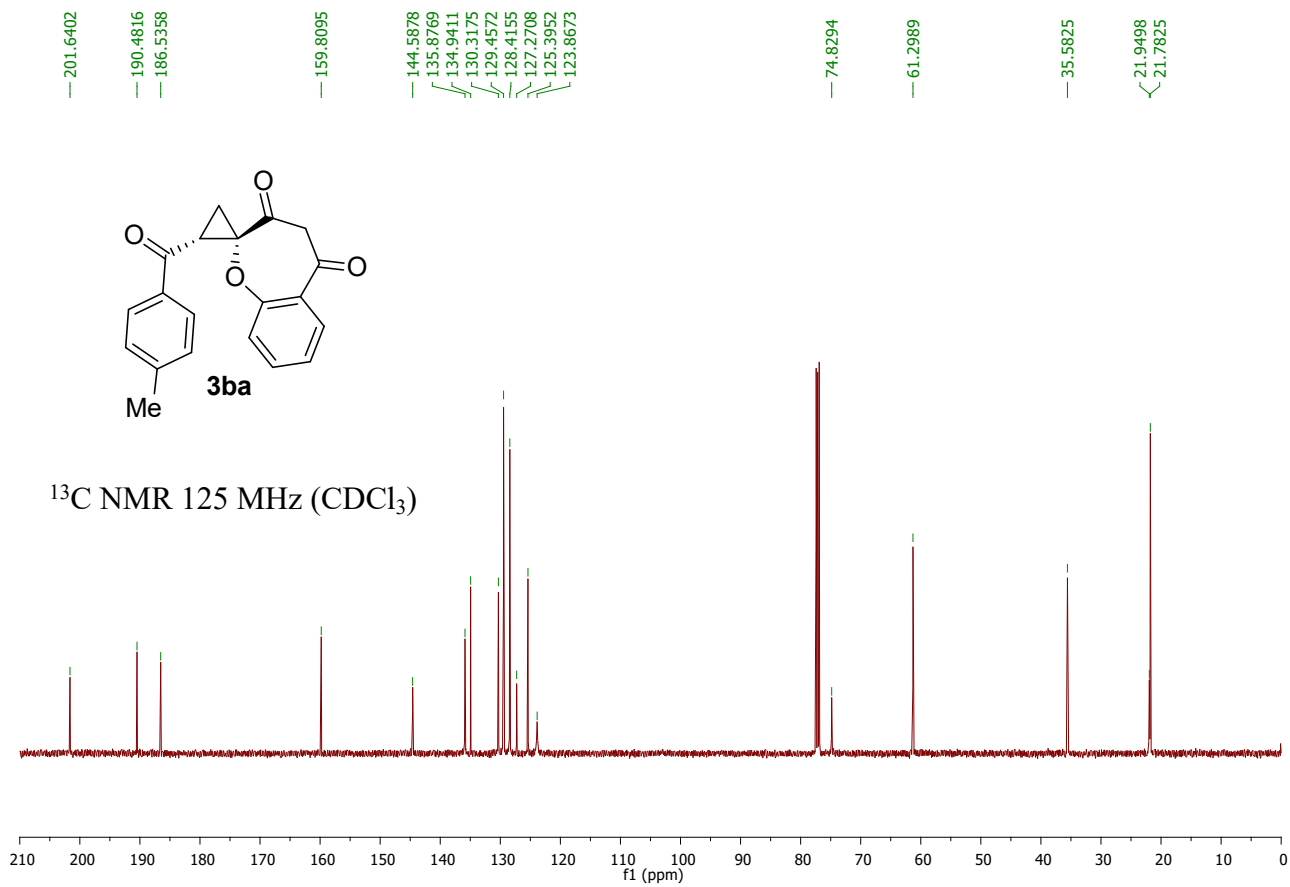

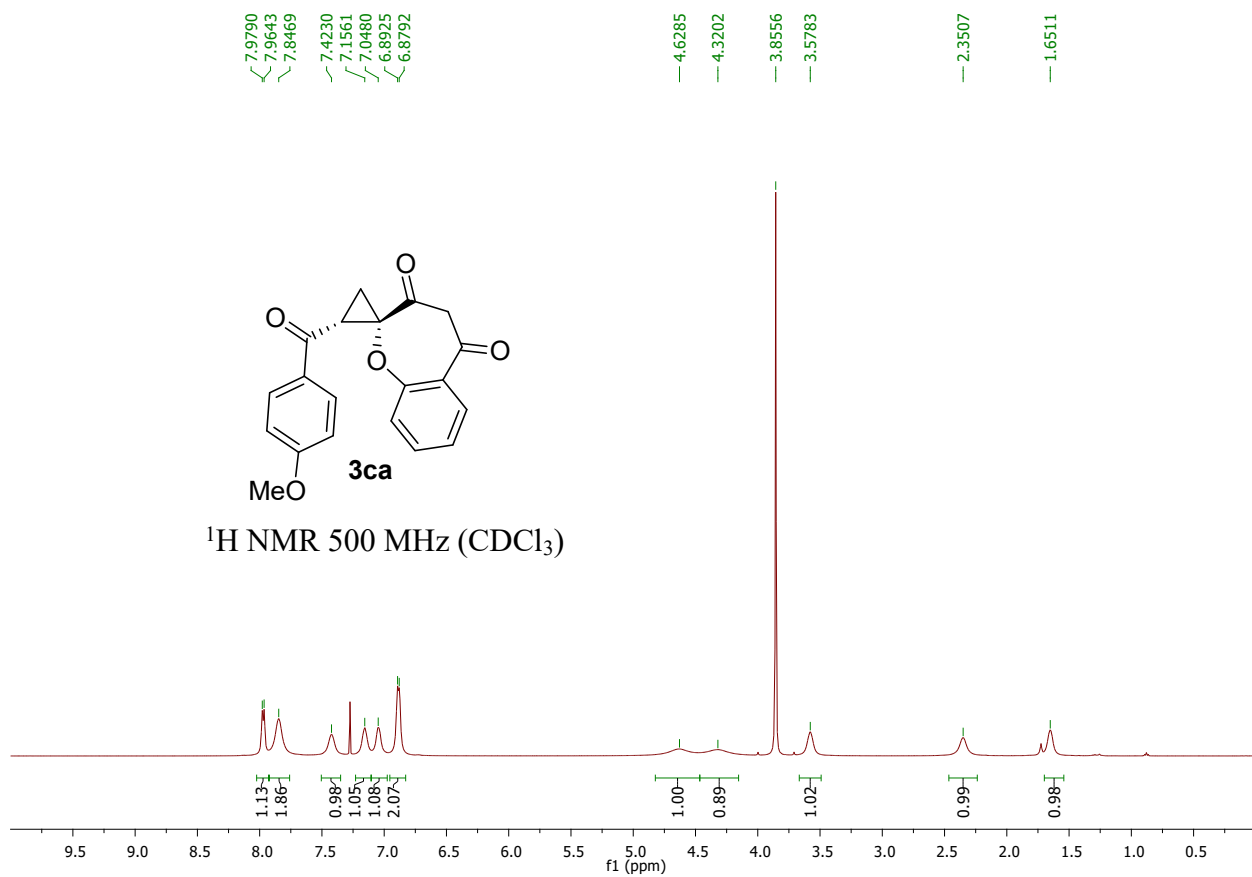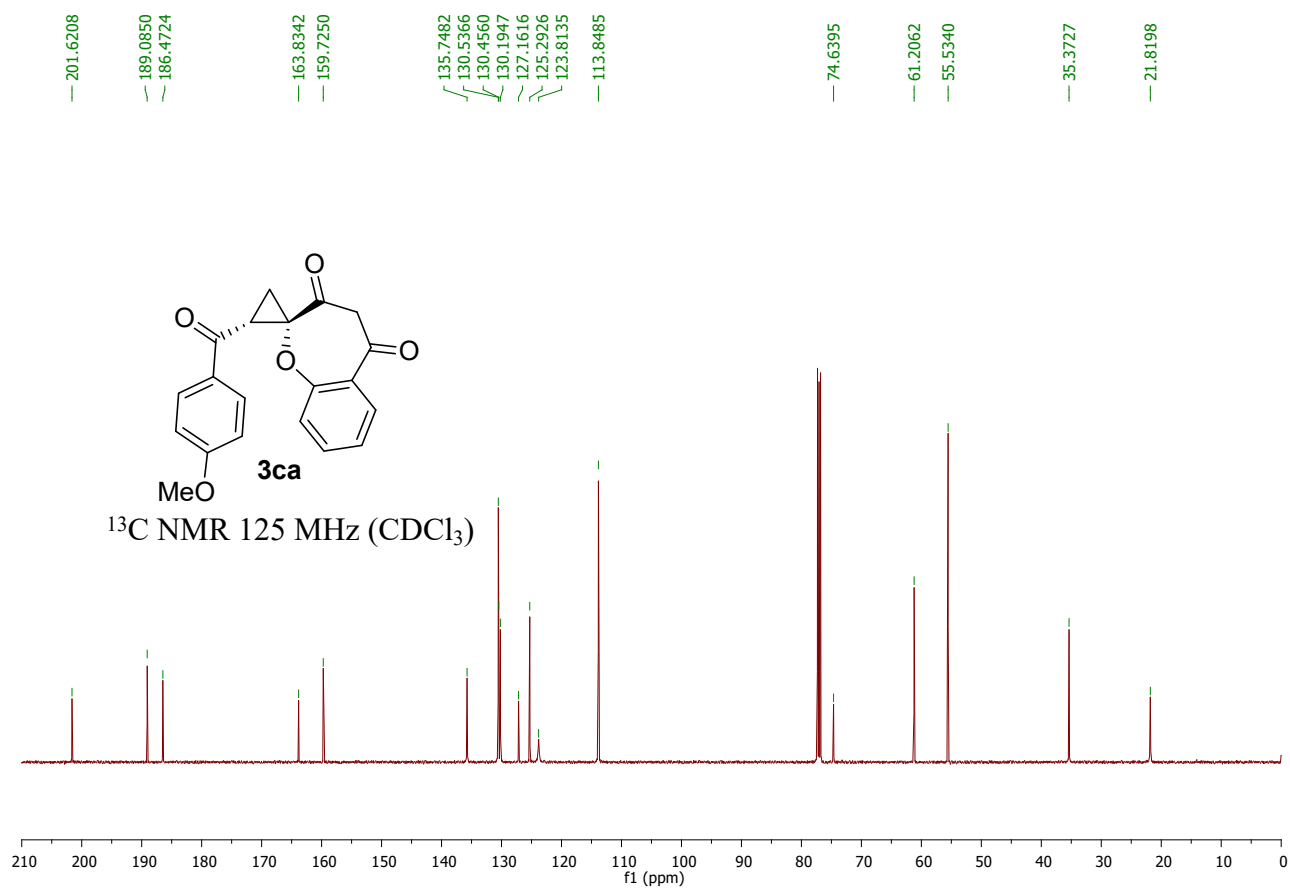



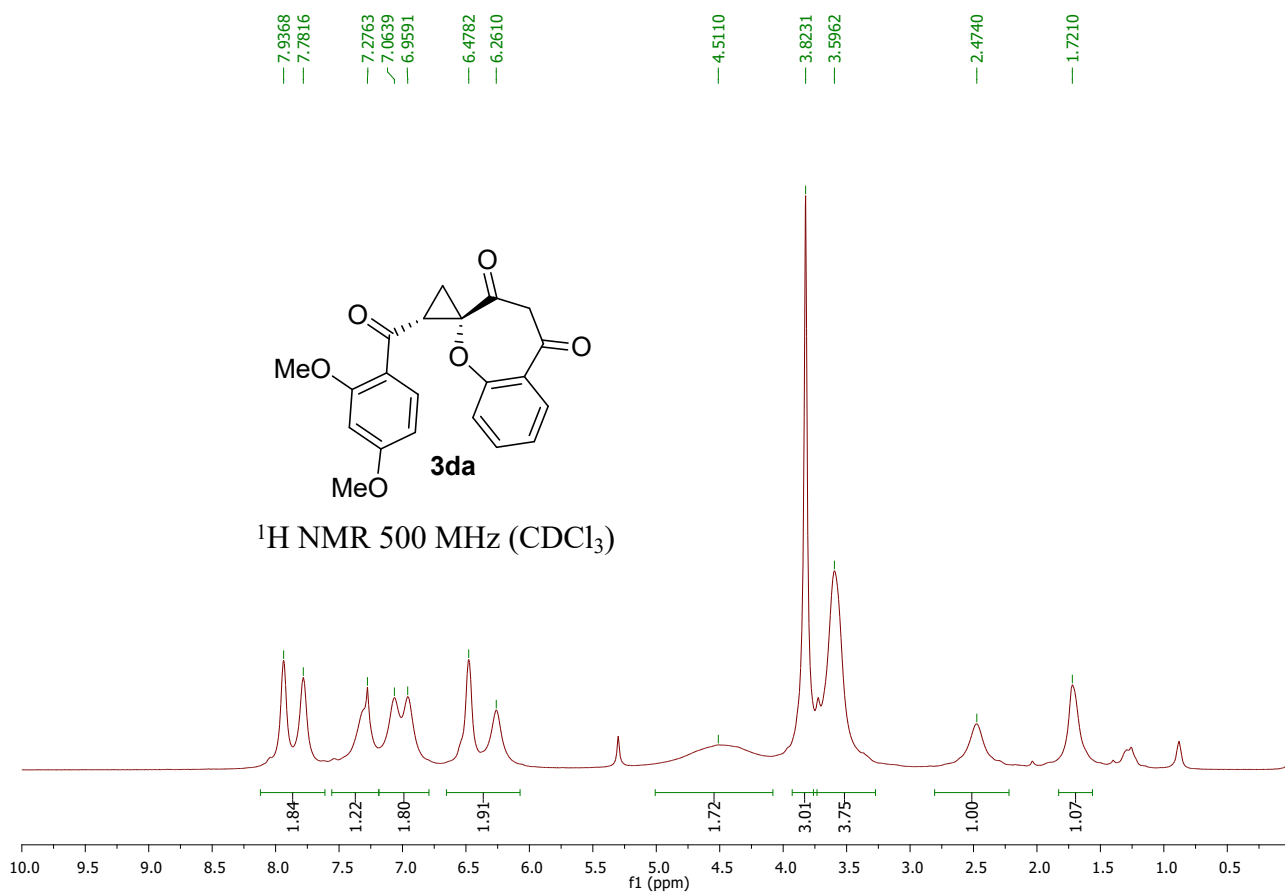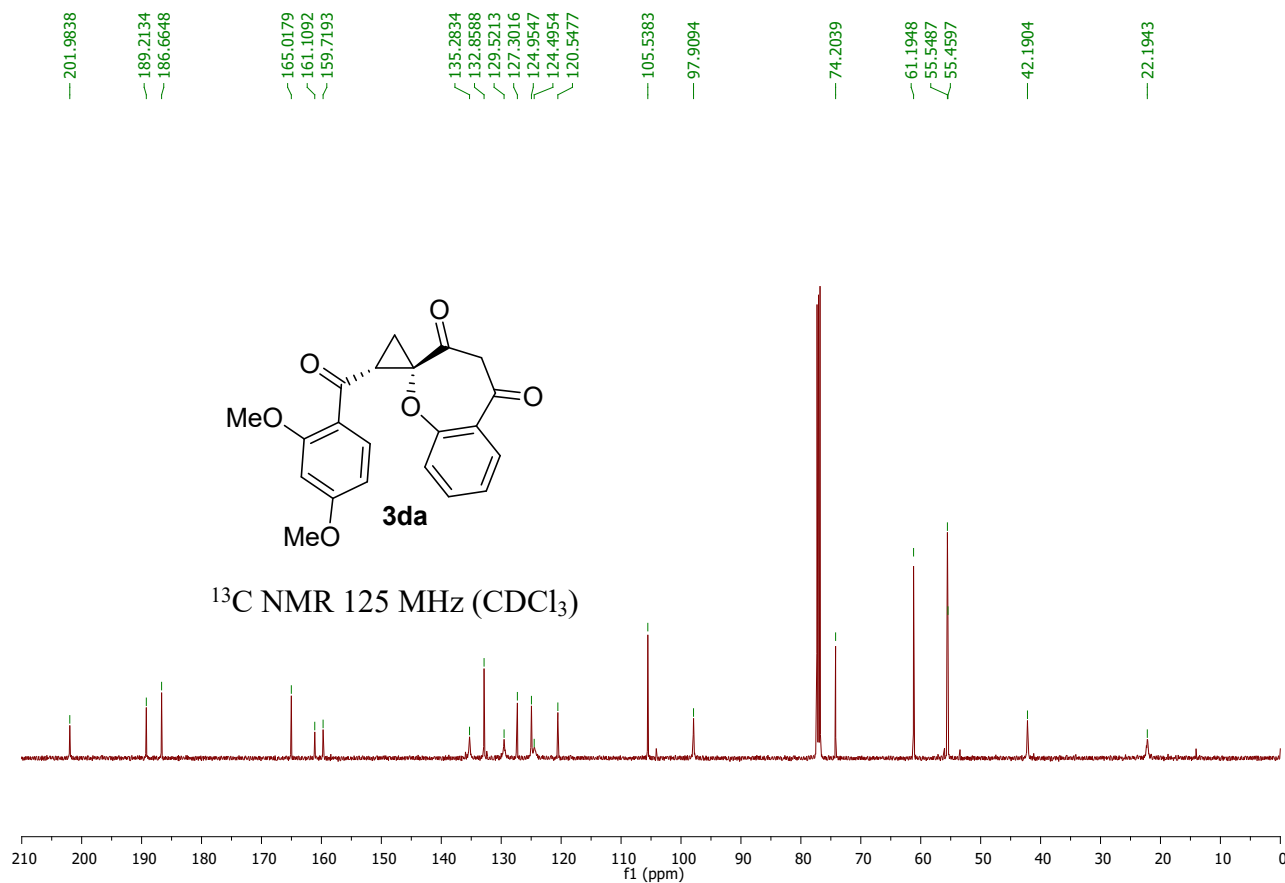

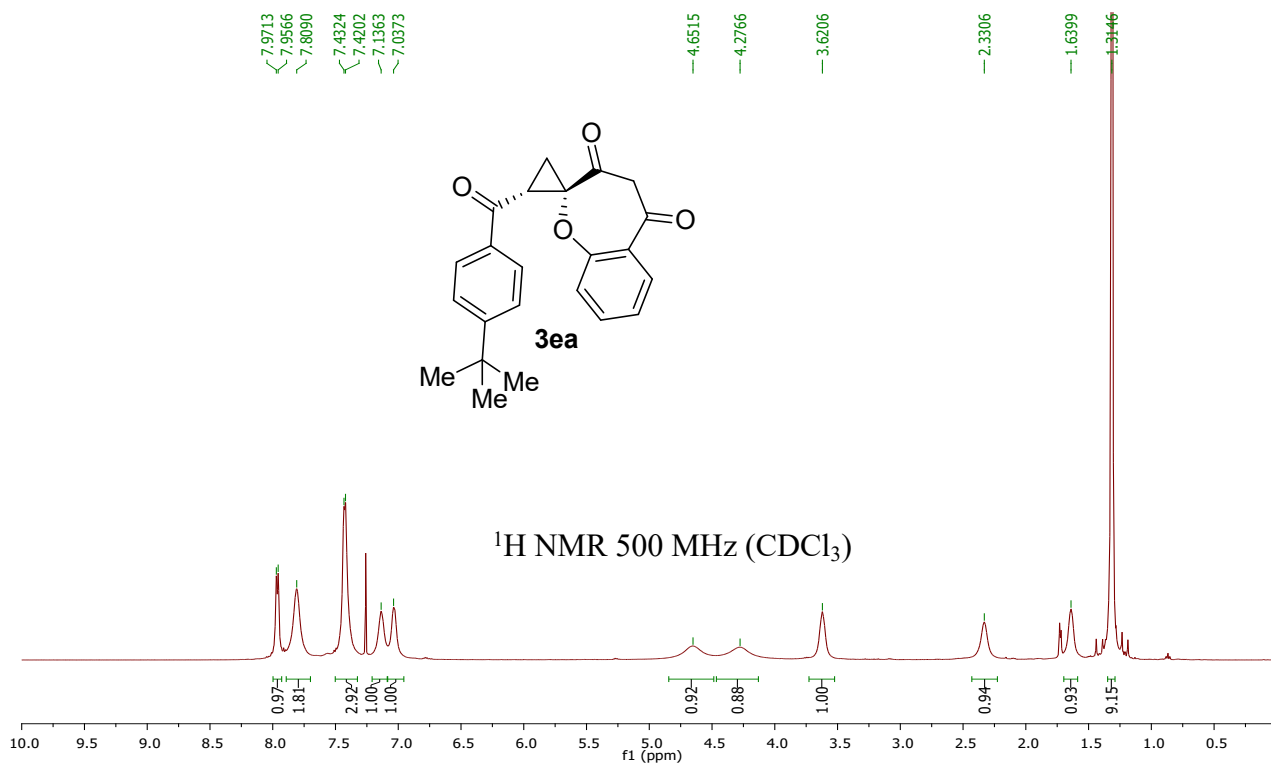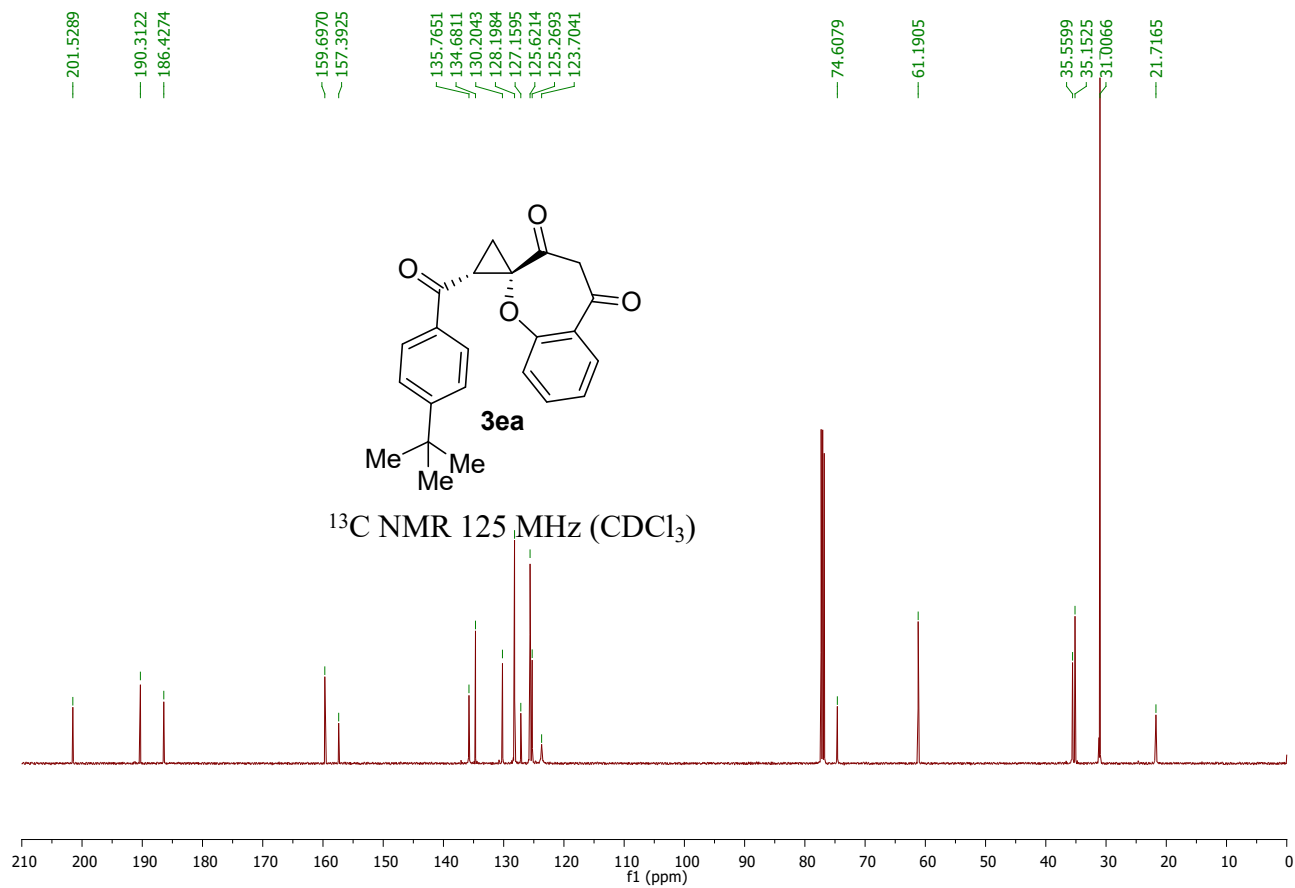

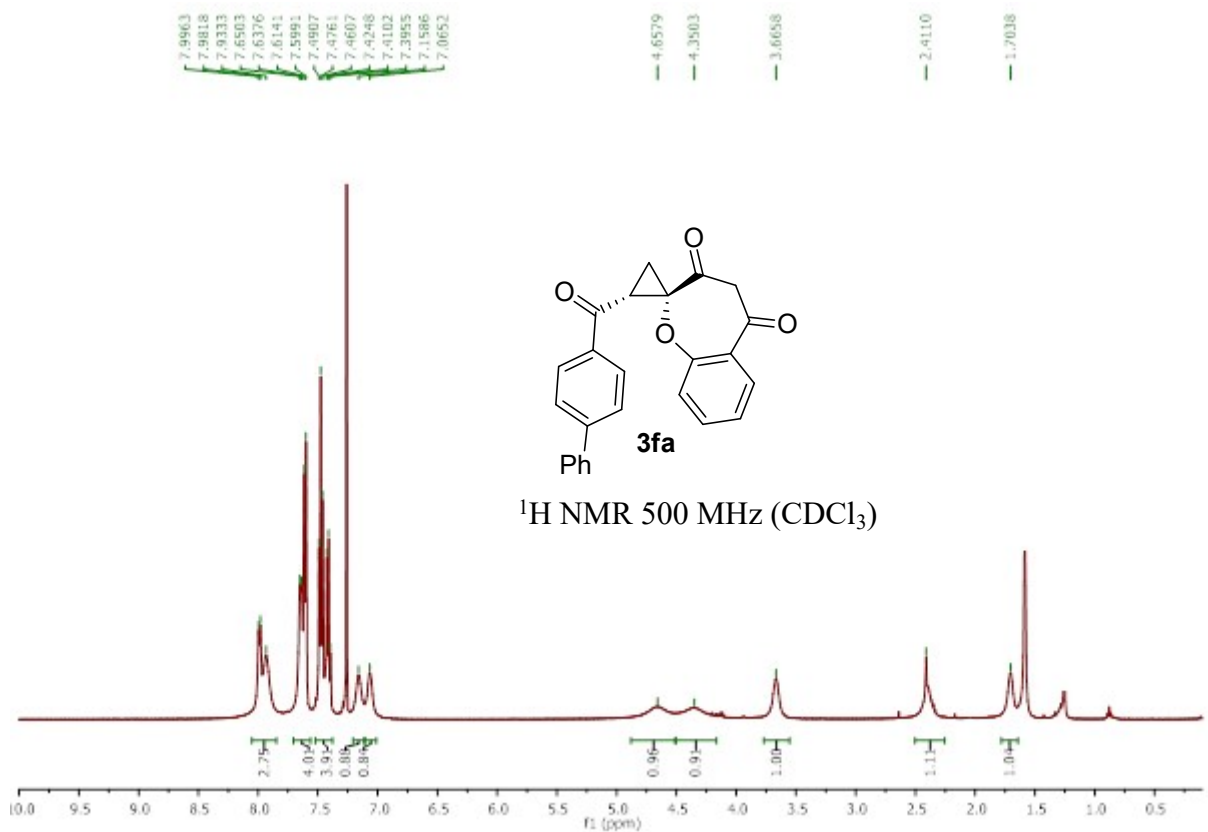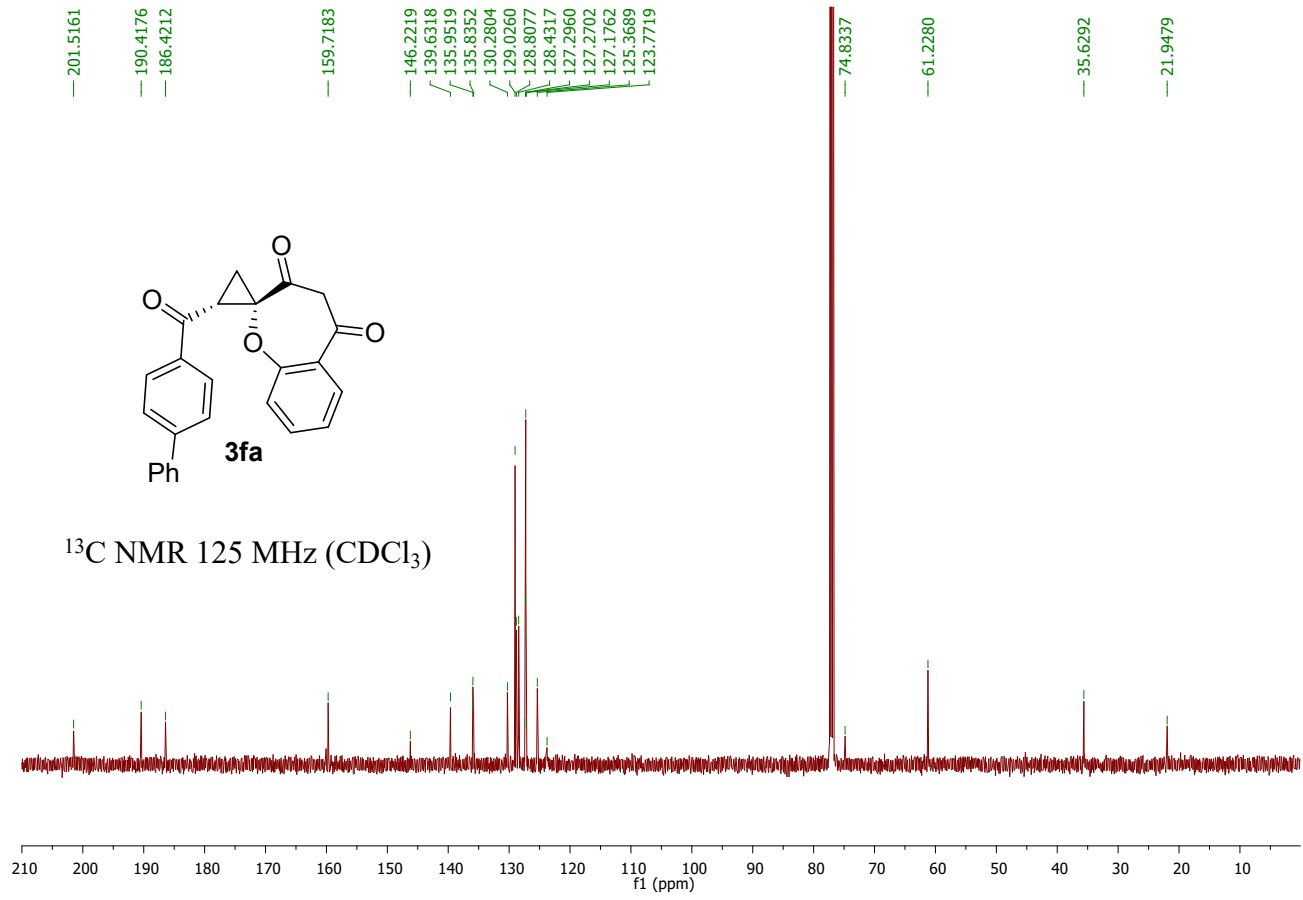

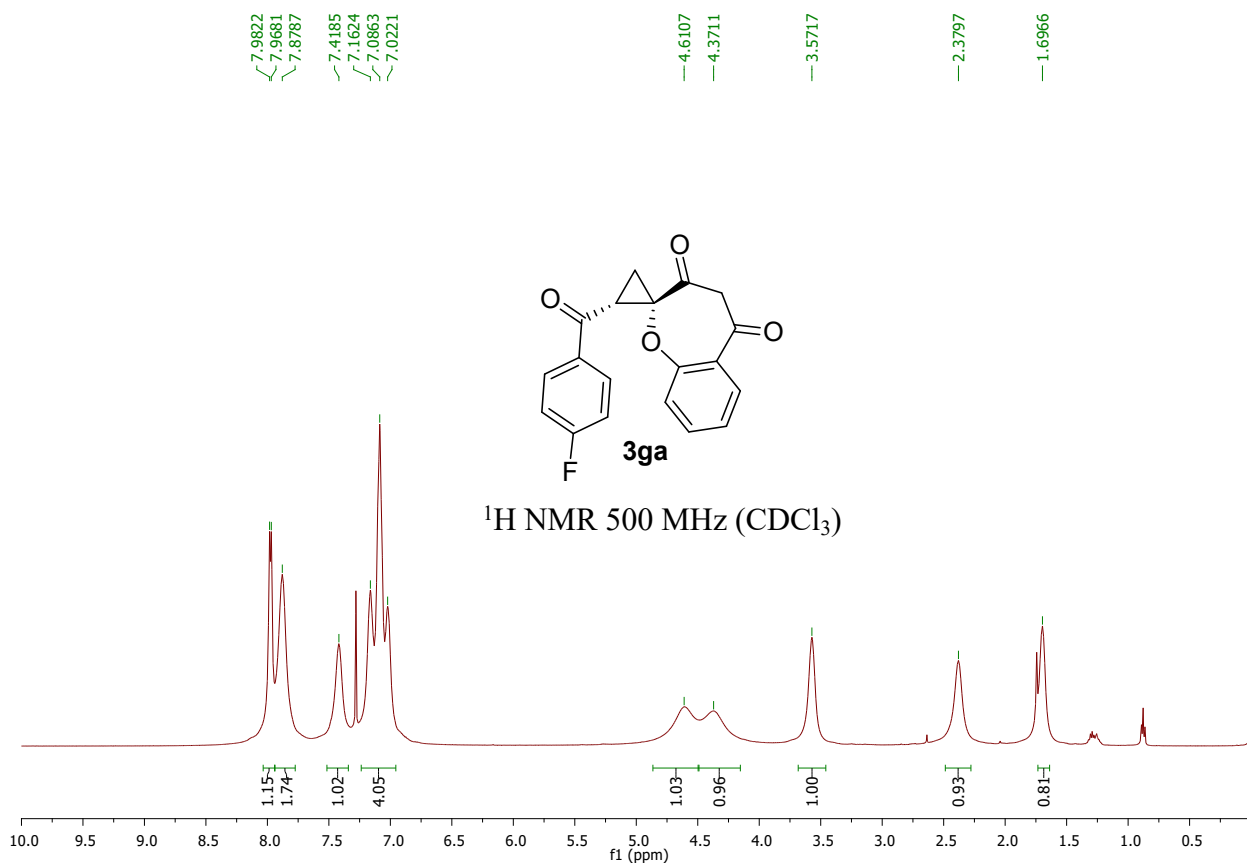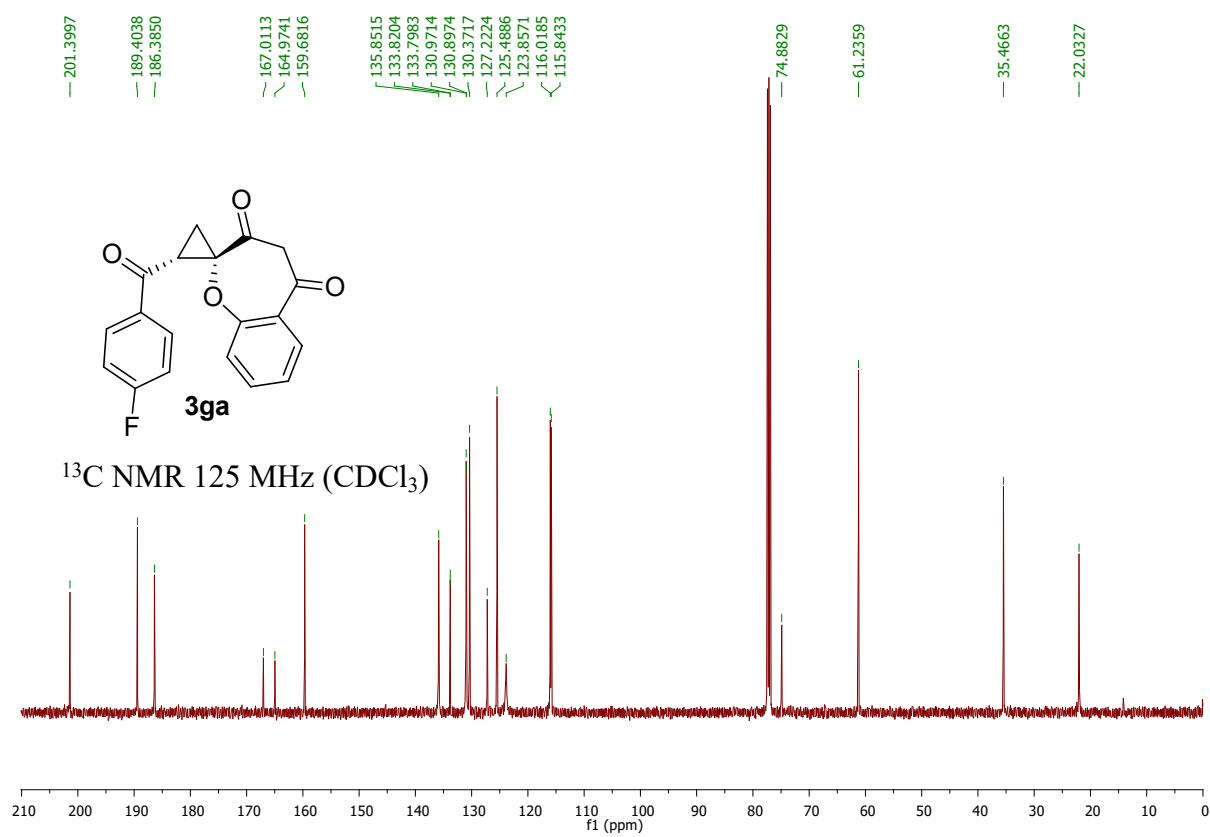

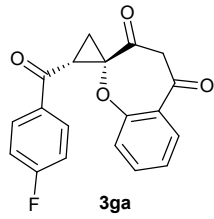

$^{19}\text{F}$  NMR 470 MHz ( $\text{CDCl}_3$ )

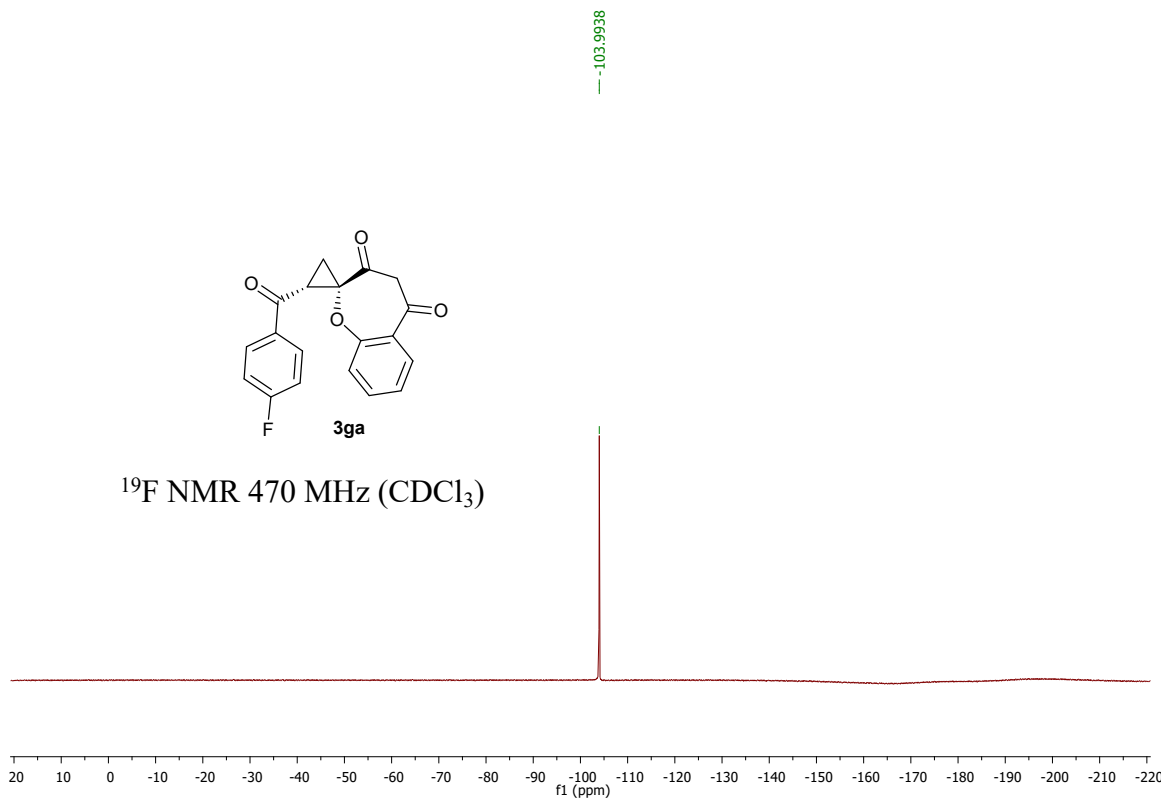

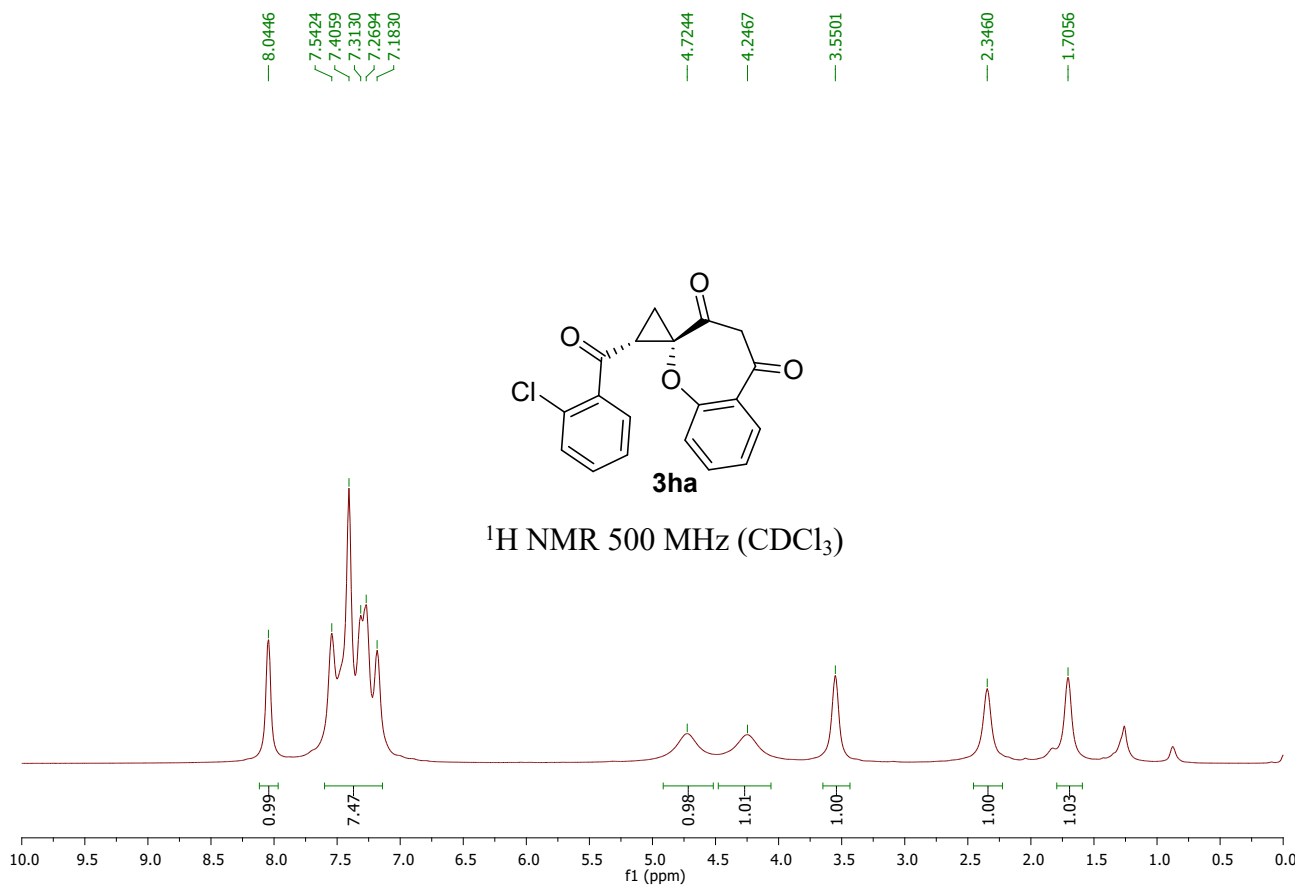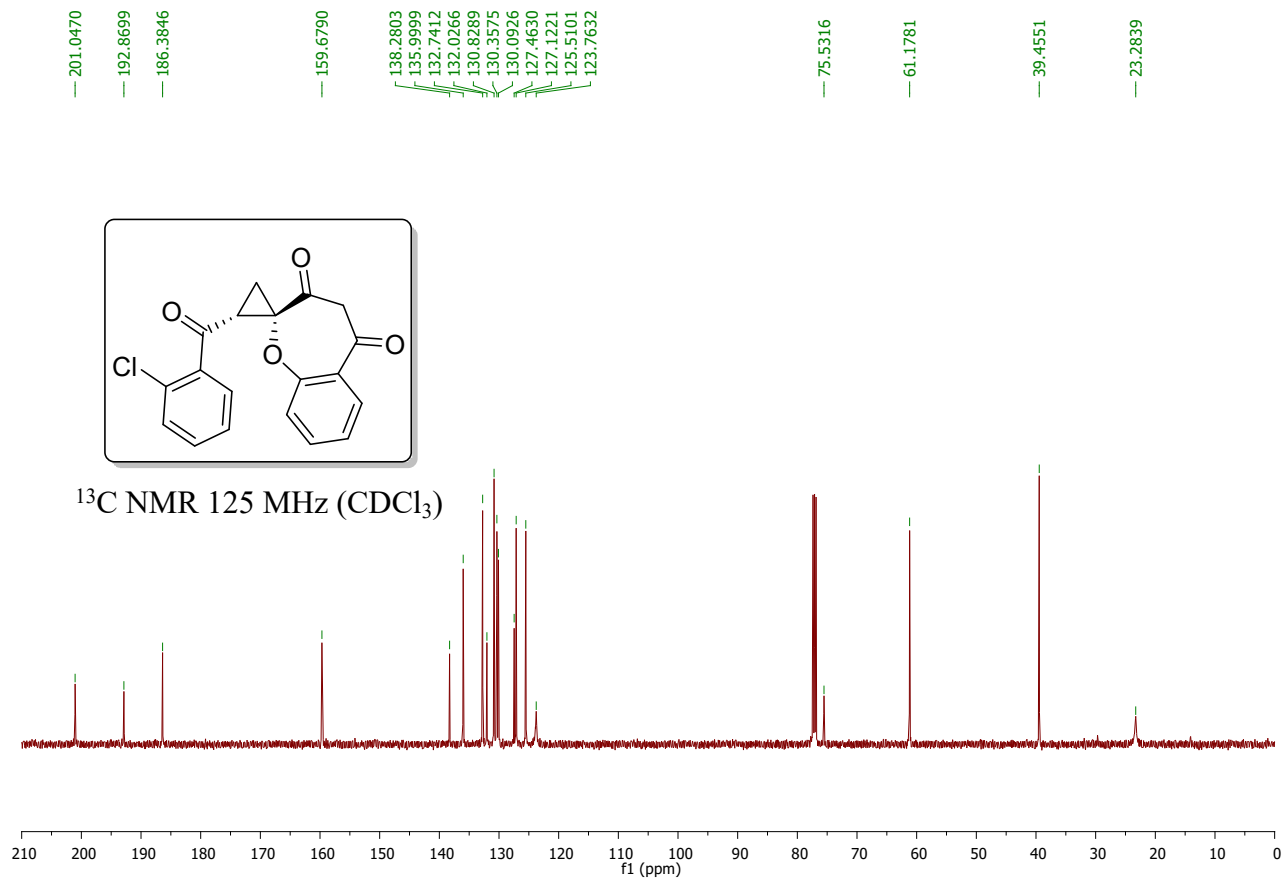

7.9876  
7.9734  
7.7004  
7.5616  
7.4233  
7.1726  
7.0124

4.6054  
4.3670

3.5550

2.3746

1.6972

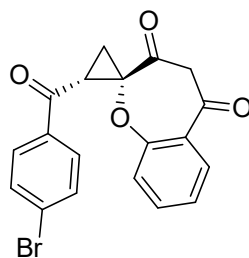

$^1\text{H}$  NMR 500 MHz ( $\text{CDCl}_3$ )

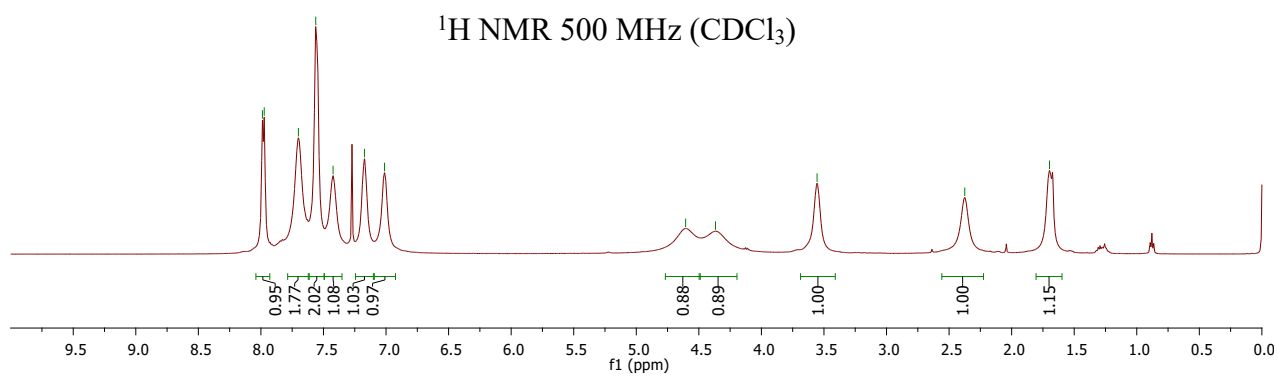

201.2443

189.9870

186.2534

159.5655

135.9453

135.8063

132.0003

130.3194

129.6093

128.8259

127.1181

125.4371

123.7557

74.8698

61.1446

35.3405

22.0012

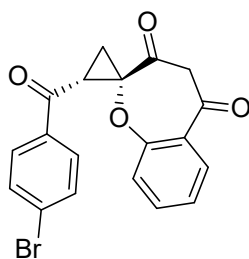

$^{13}\text{C}$  NMR 125 MHz ( $\text{CDCl}_3$ )

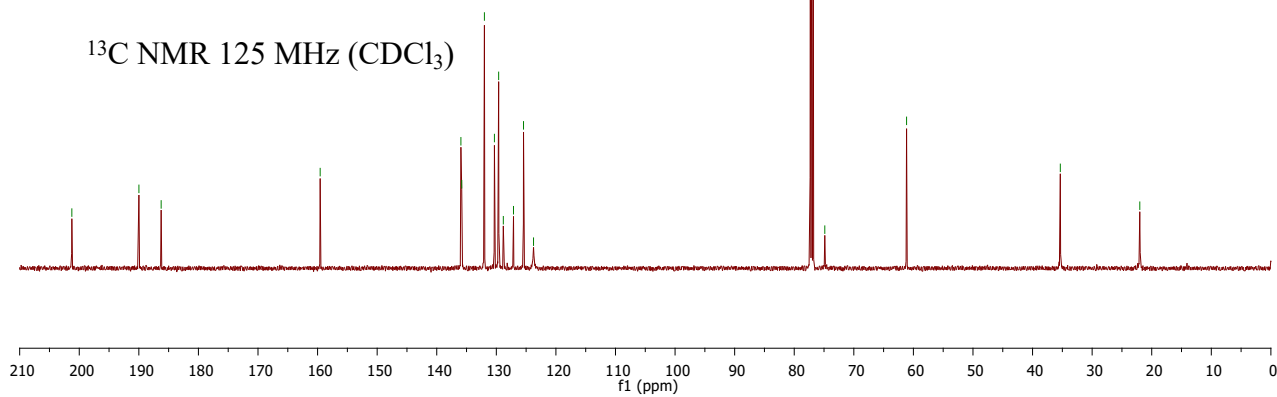

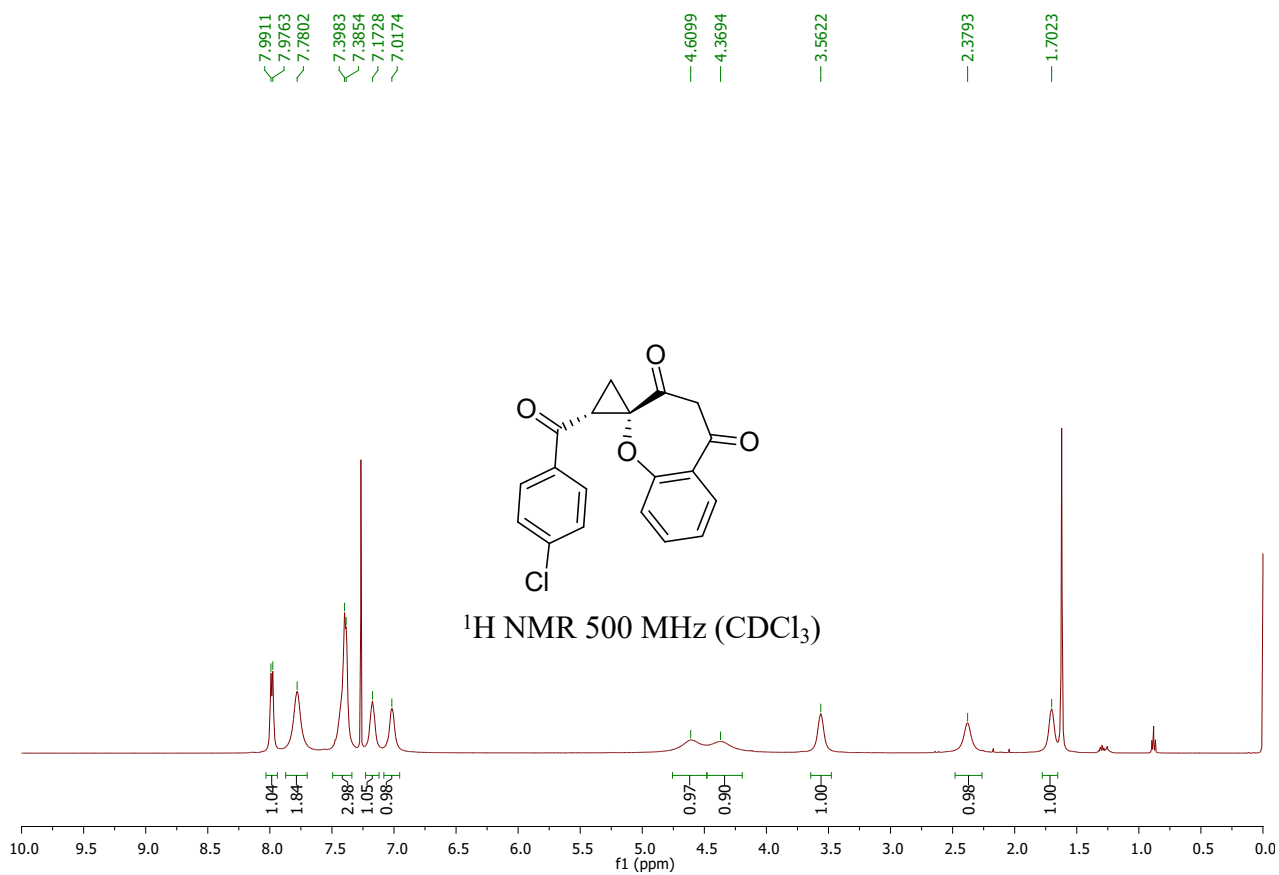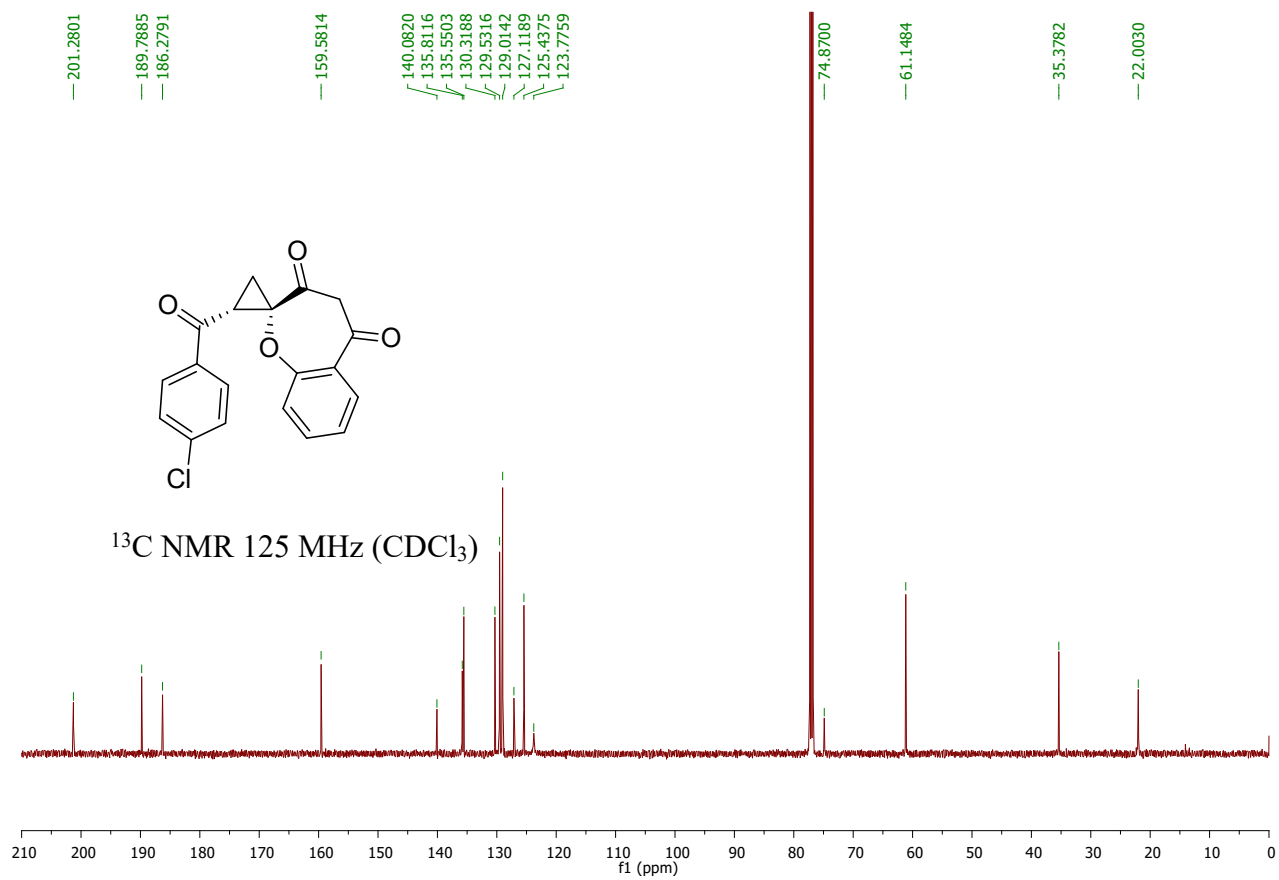



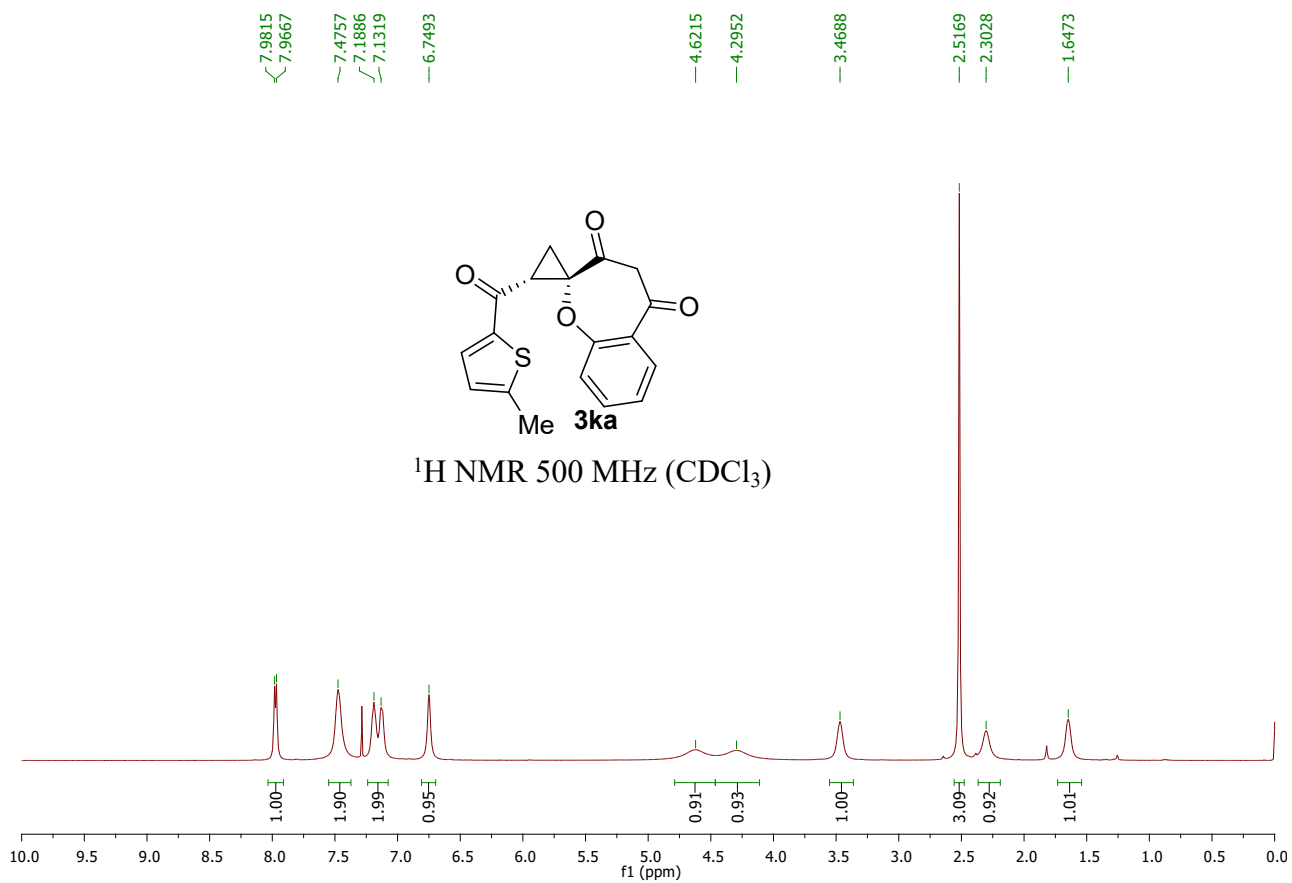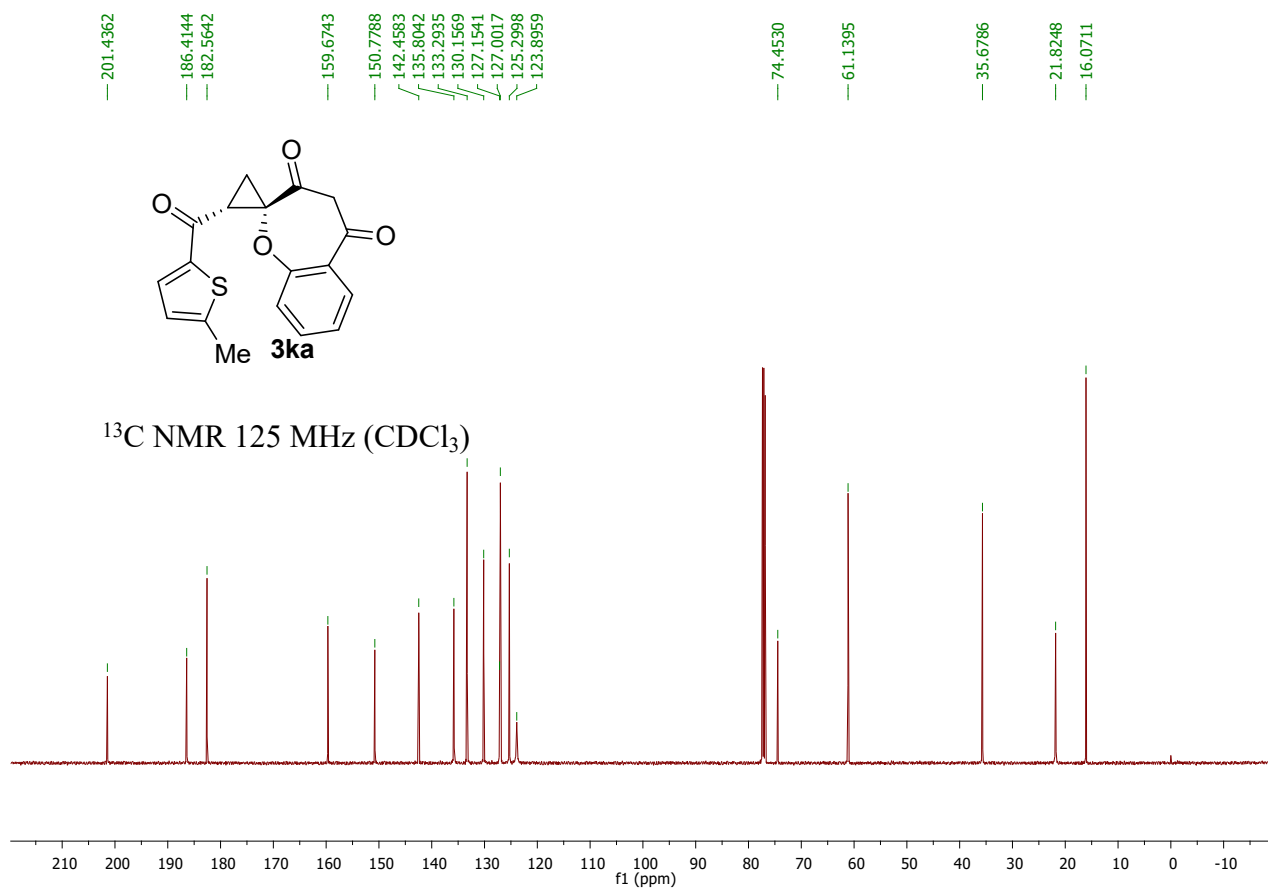

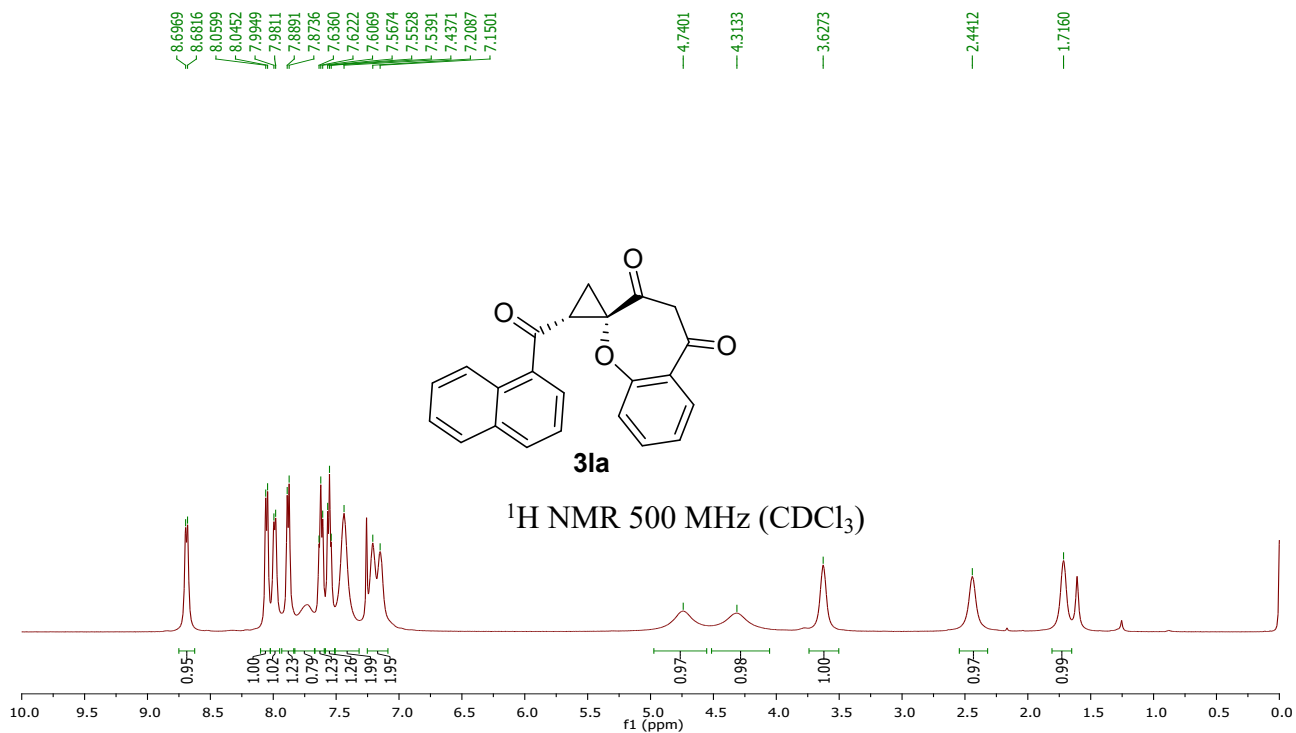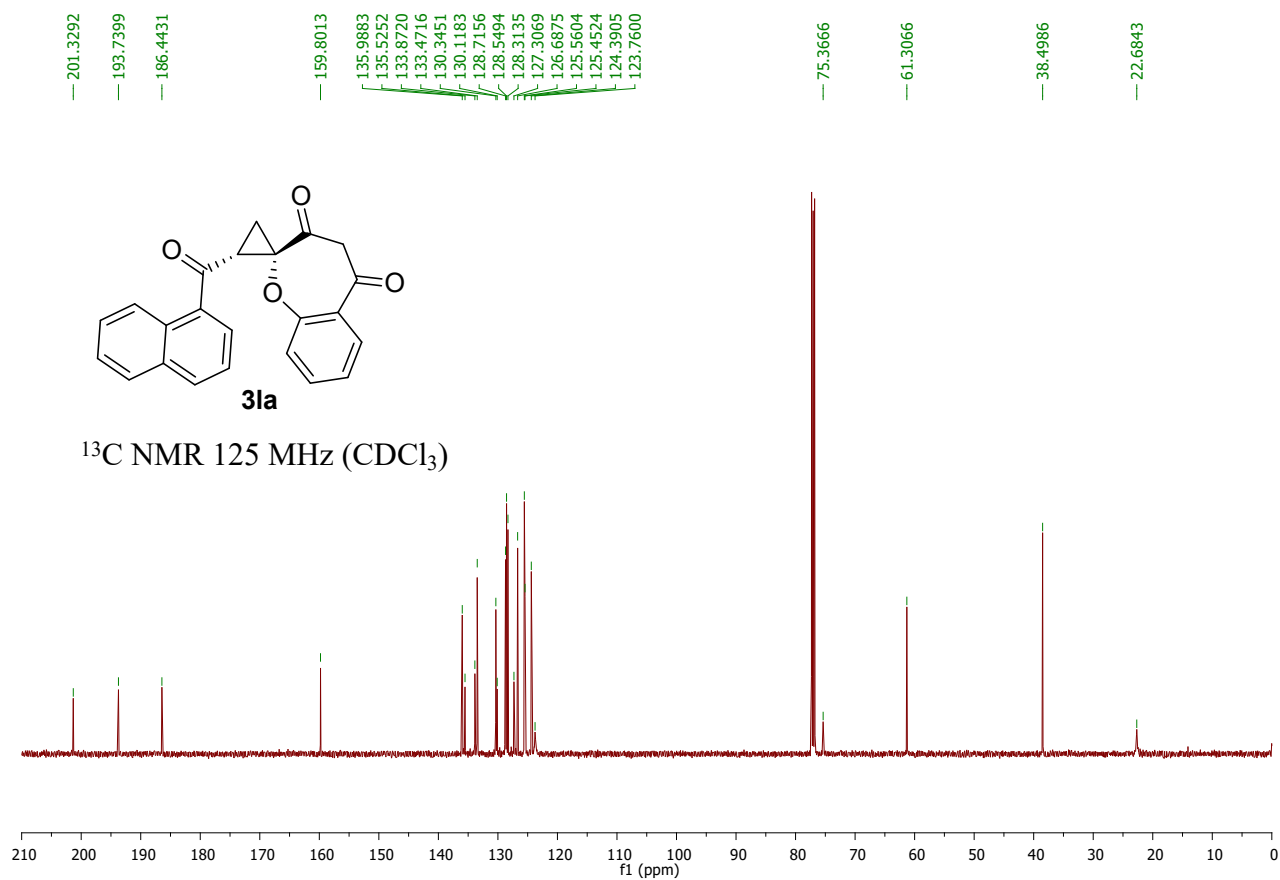

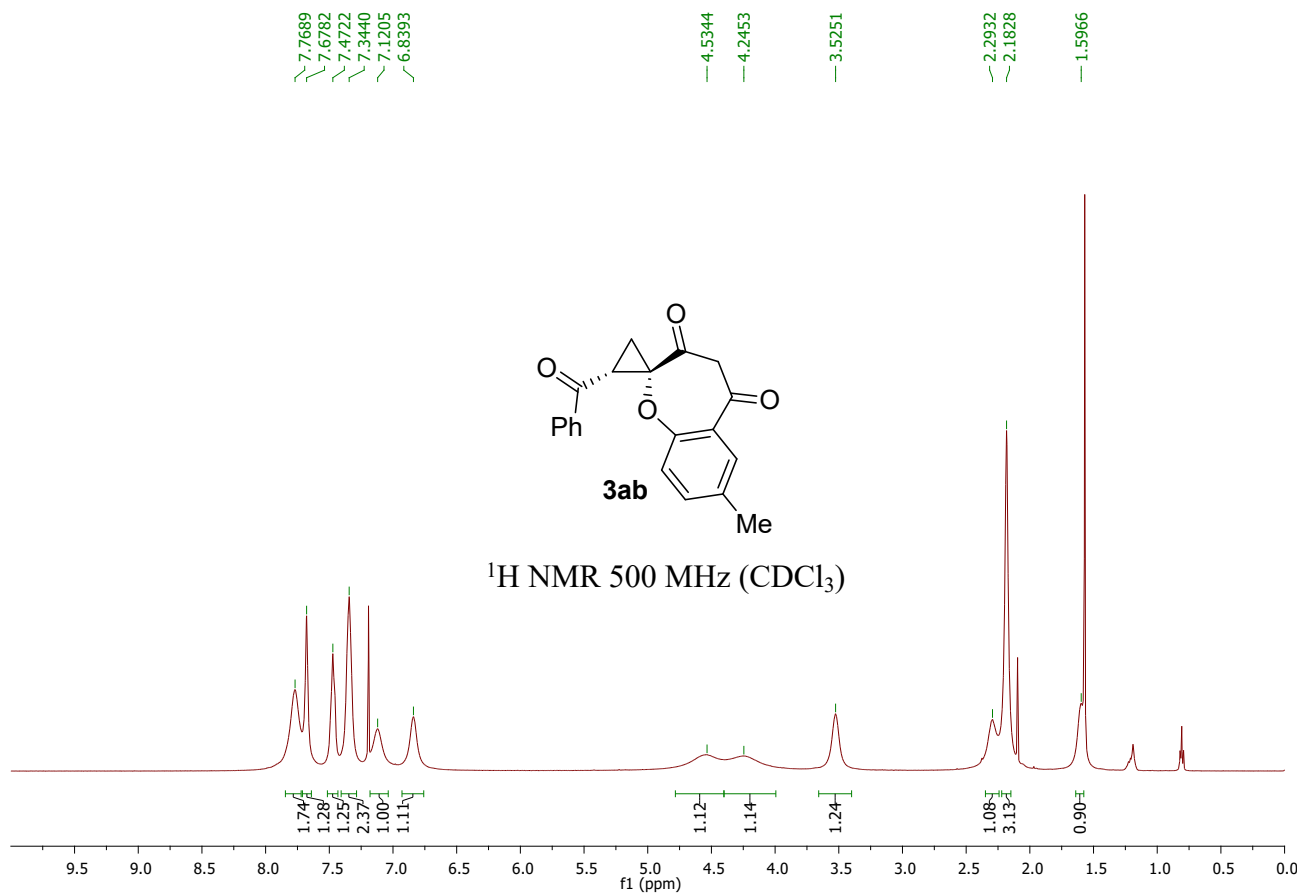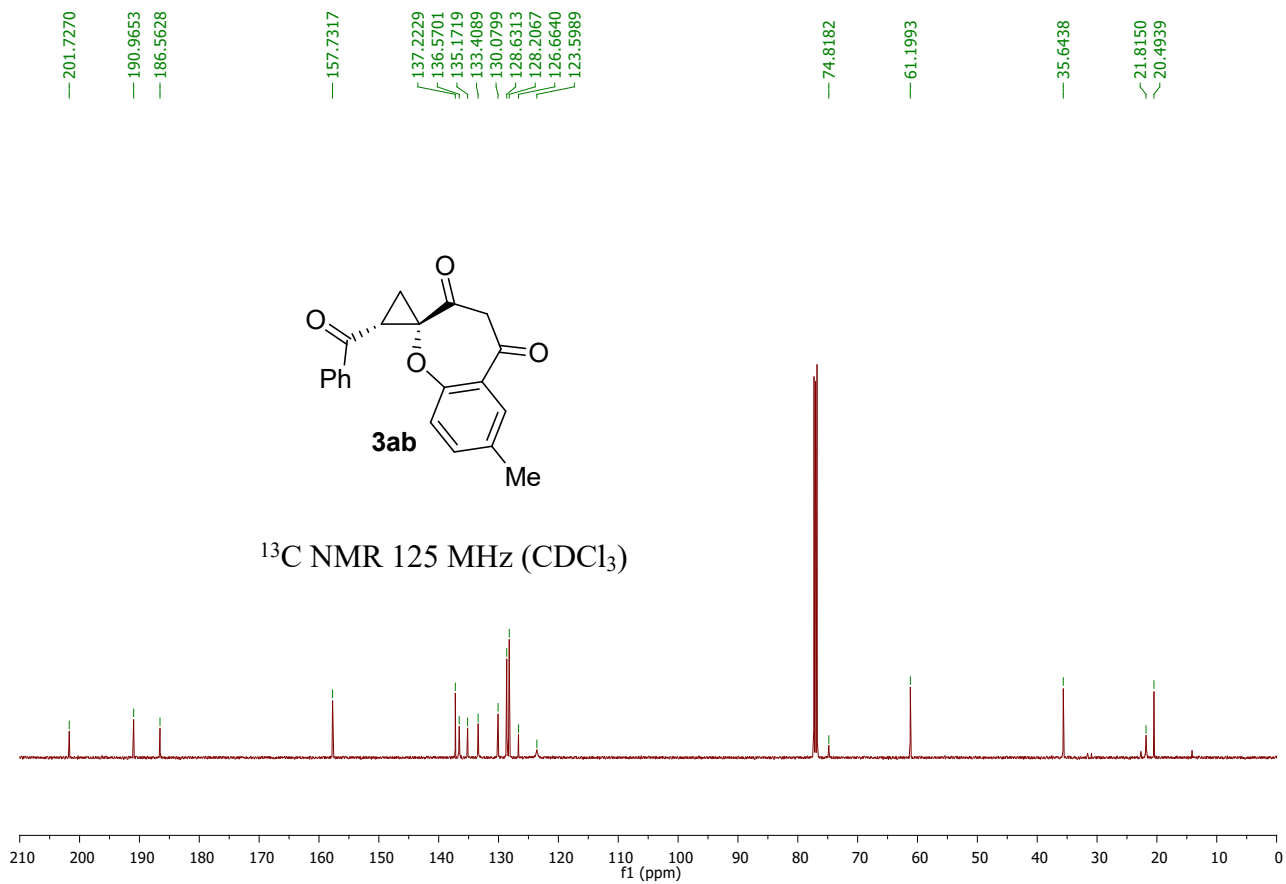

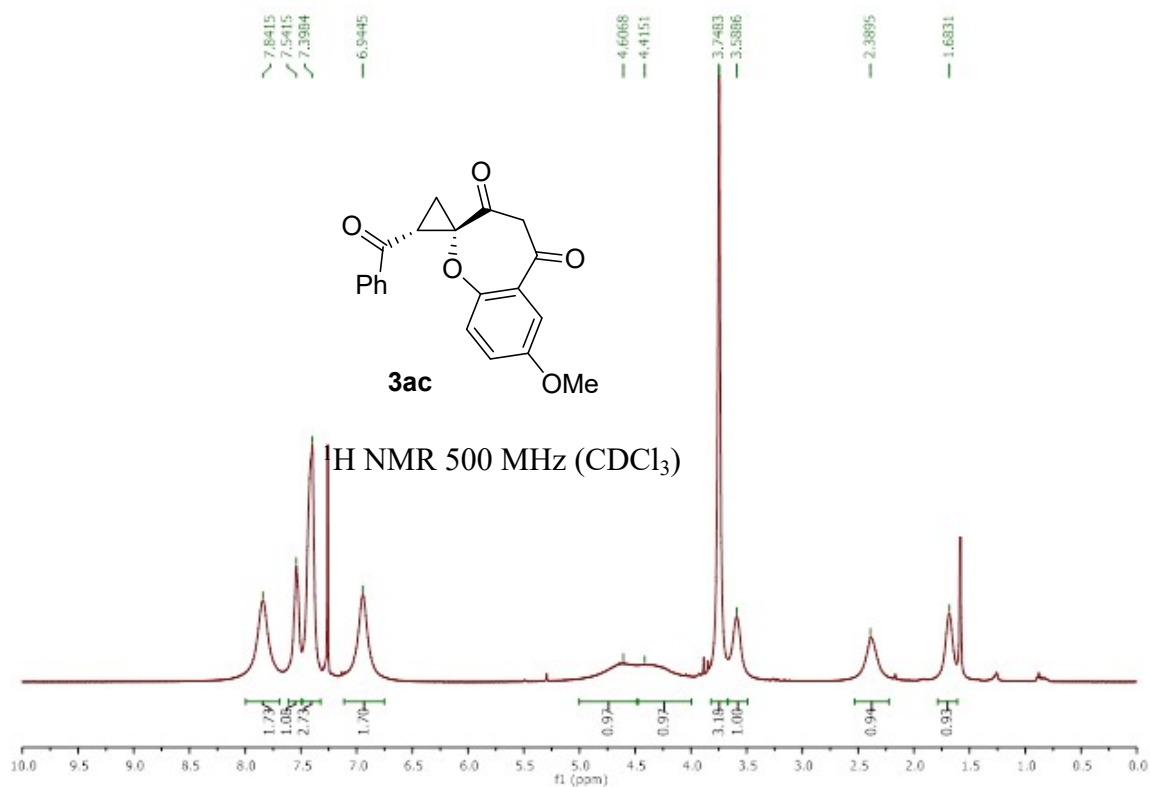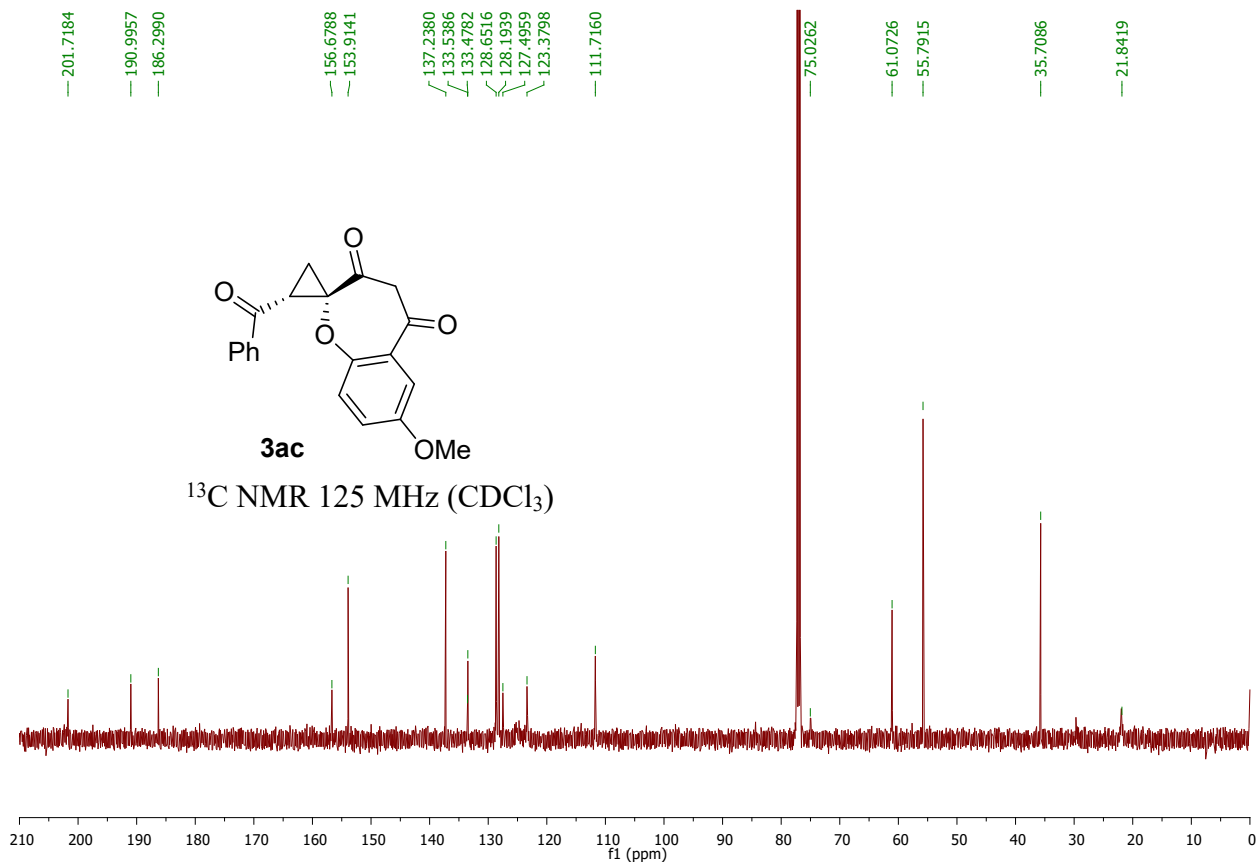

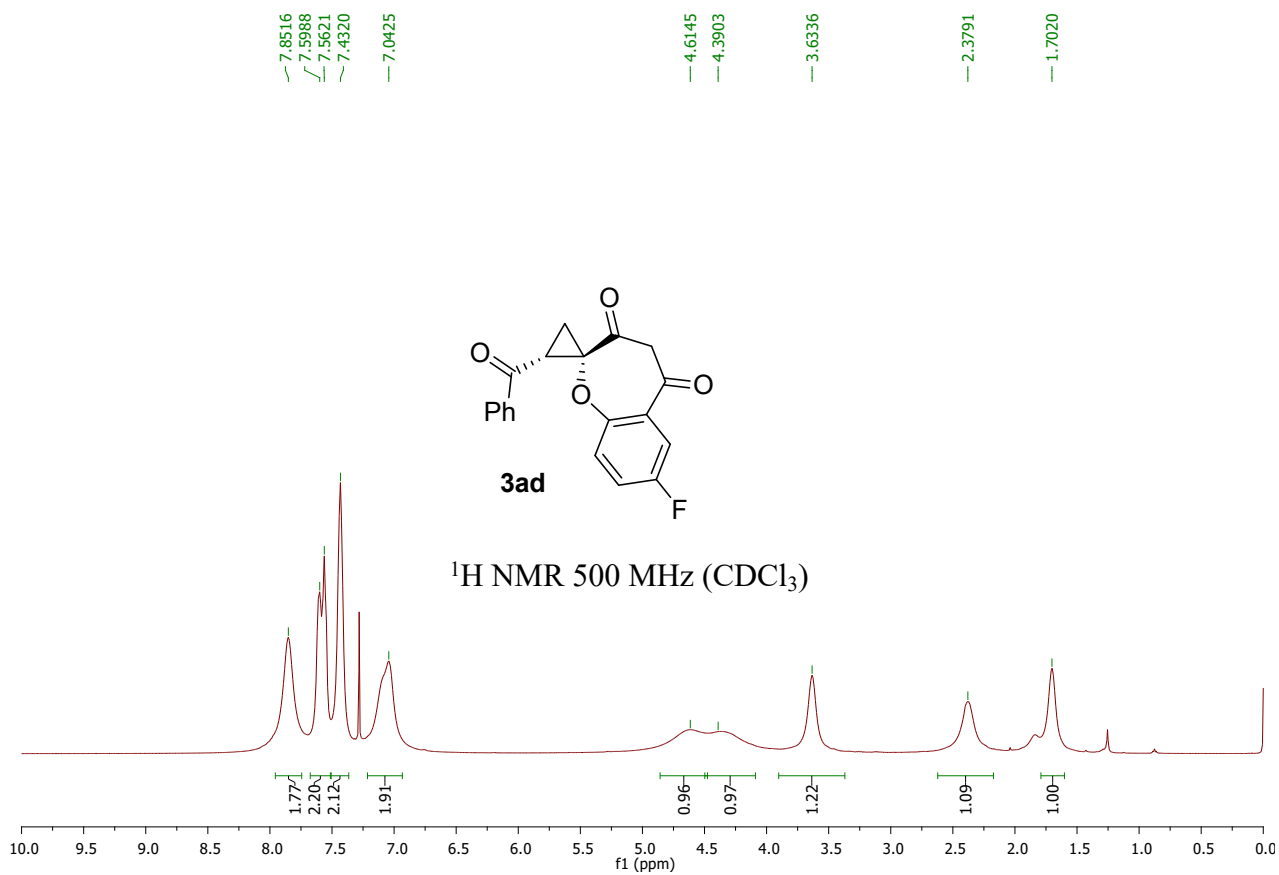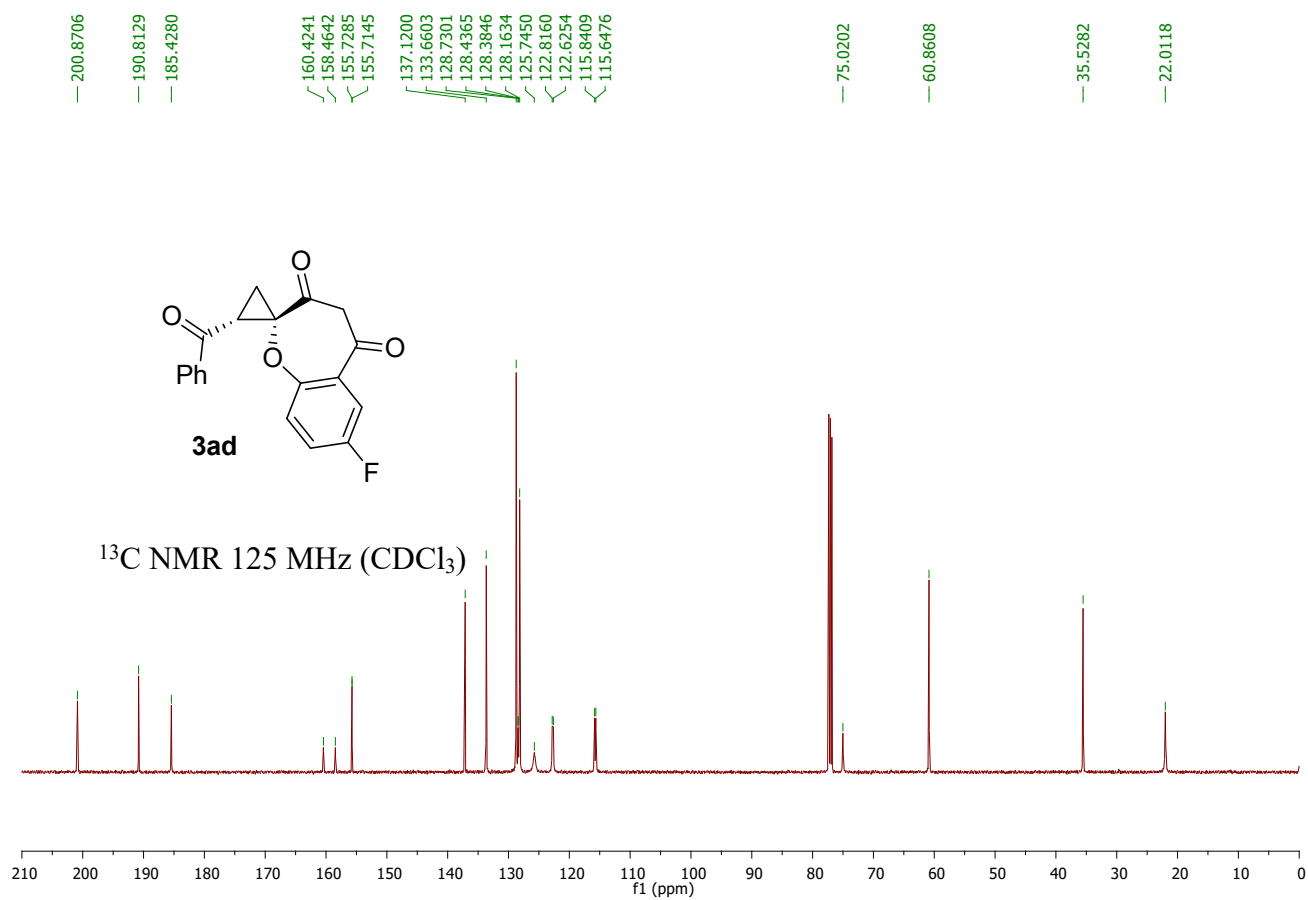

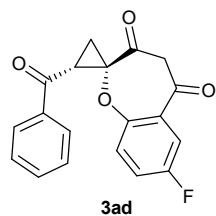

$^{19}\text{F}$  NMR 470 MHz ( $\text{CDCl}_3$ )

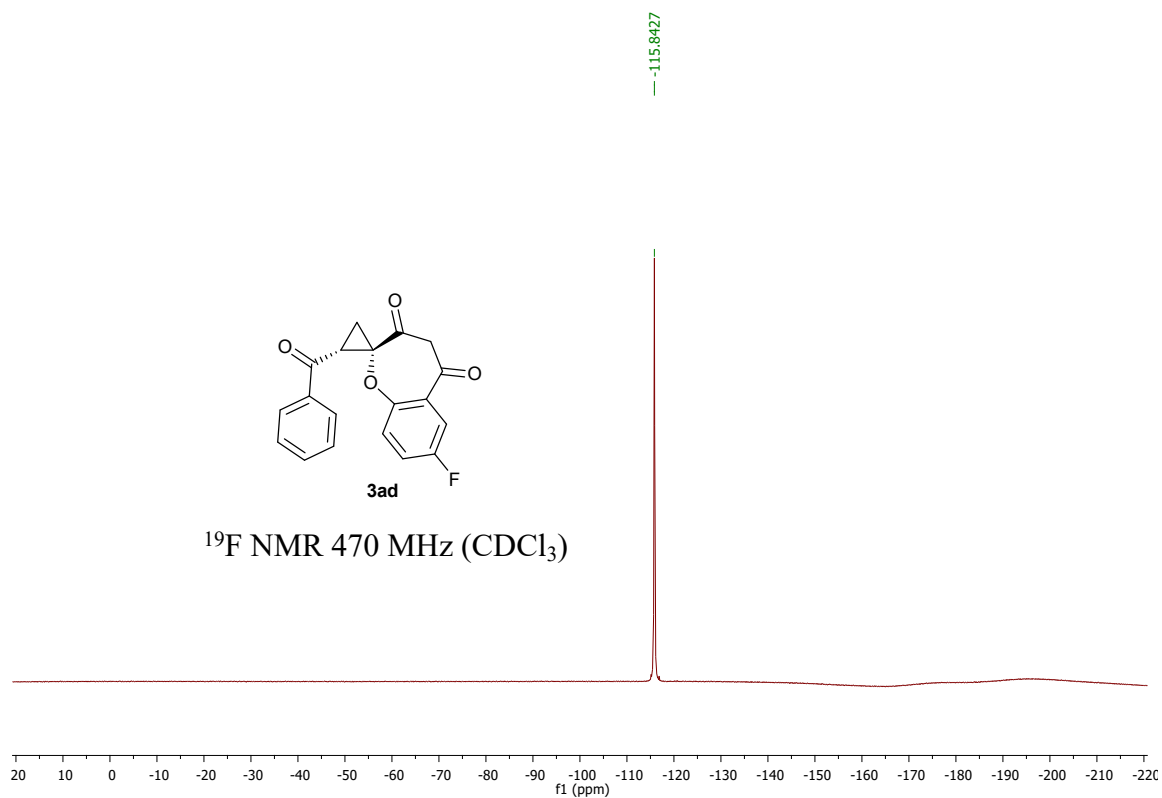

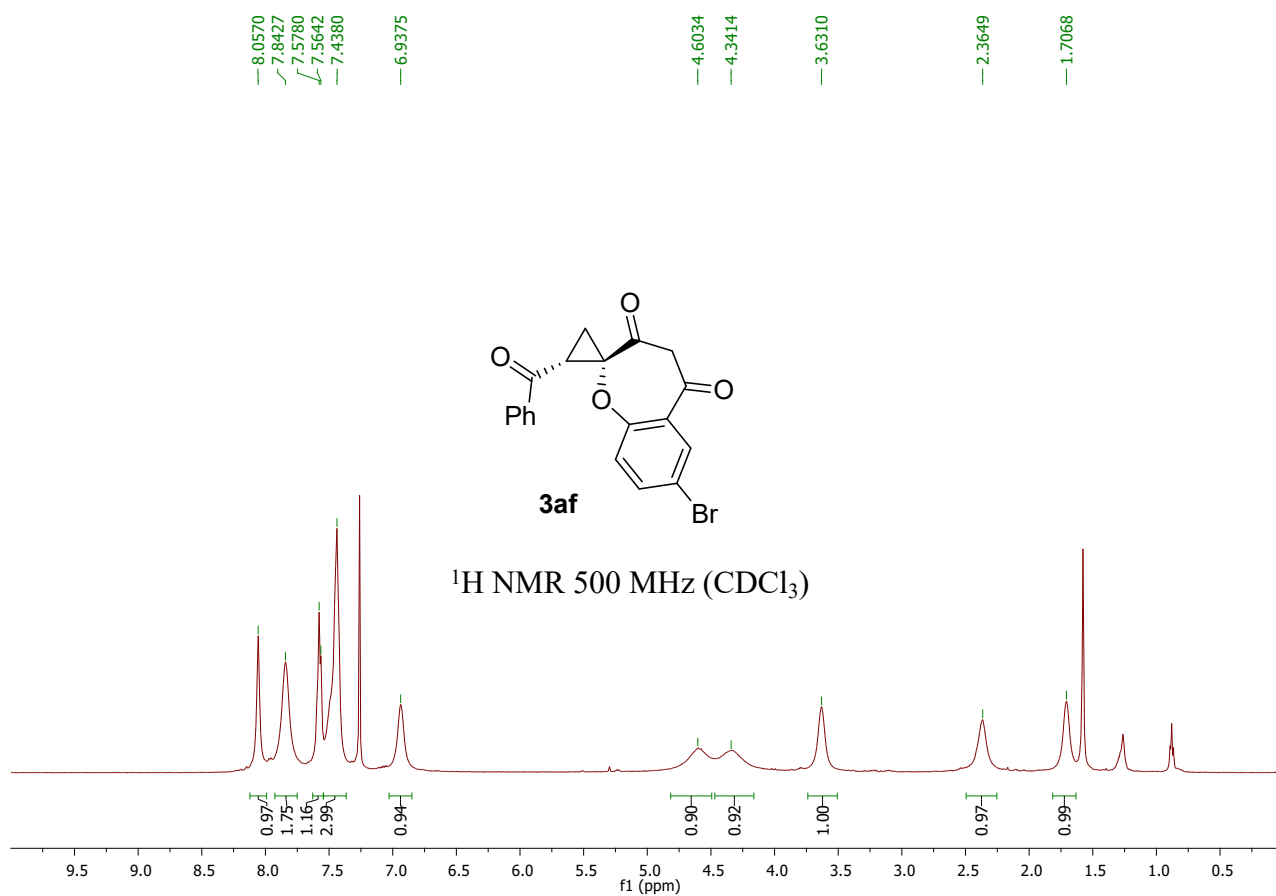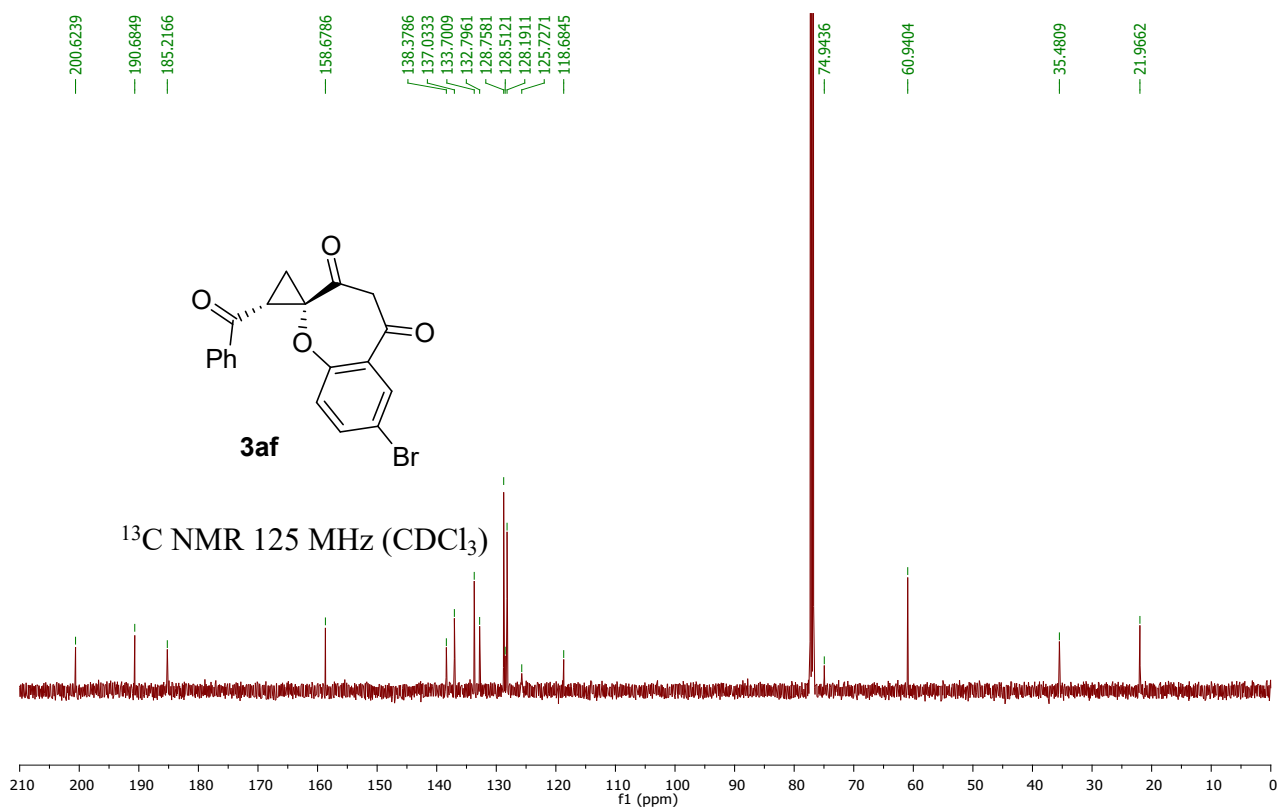

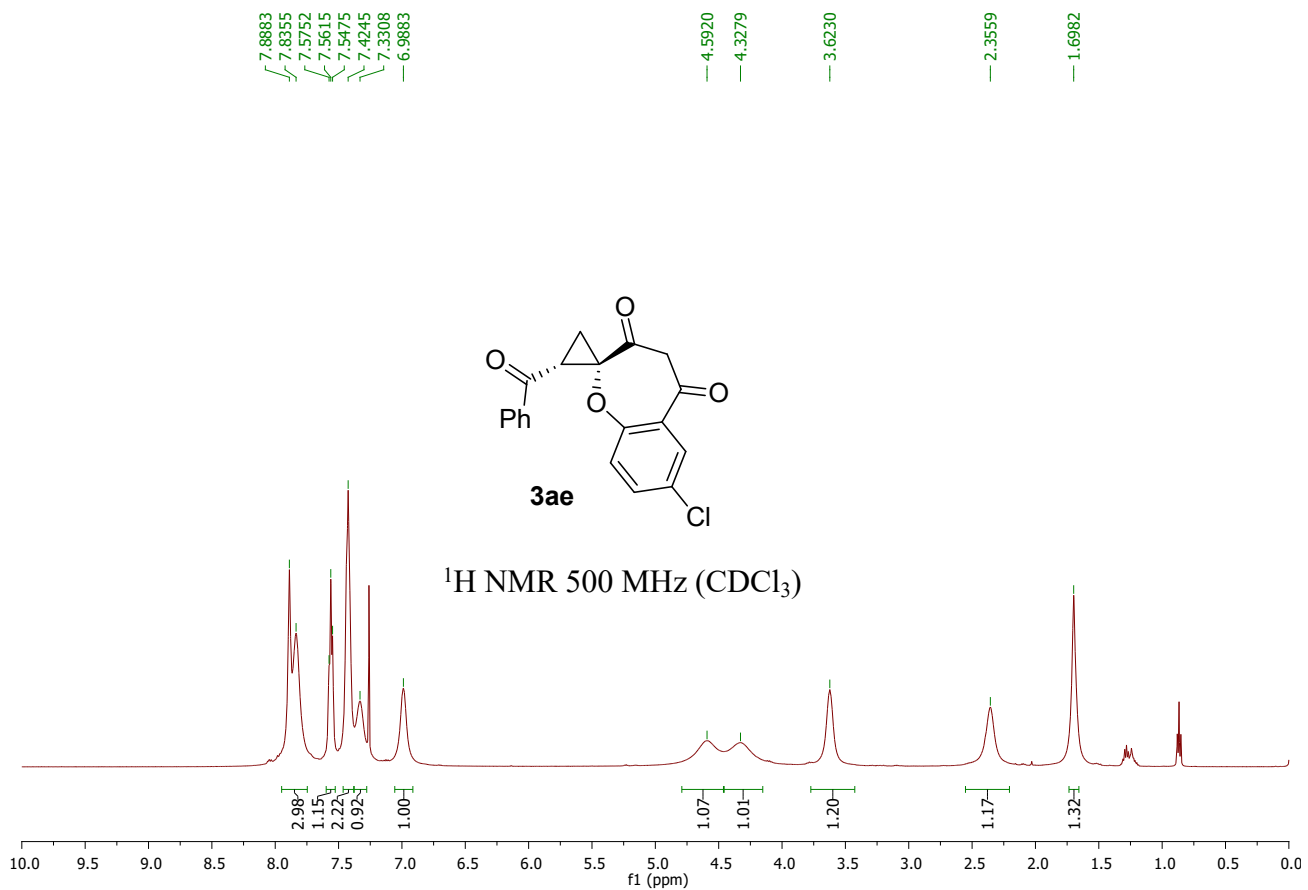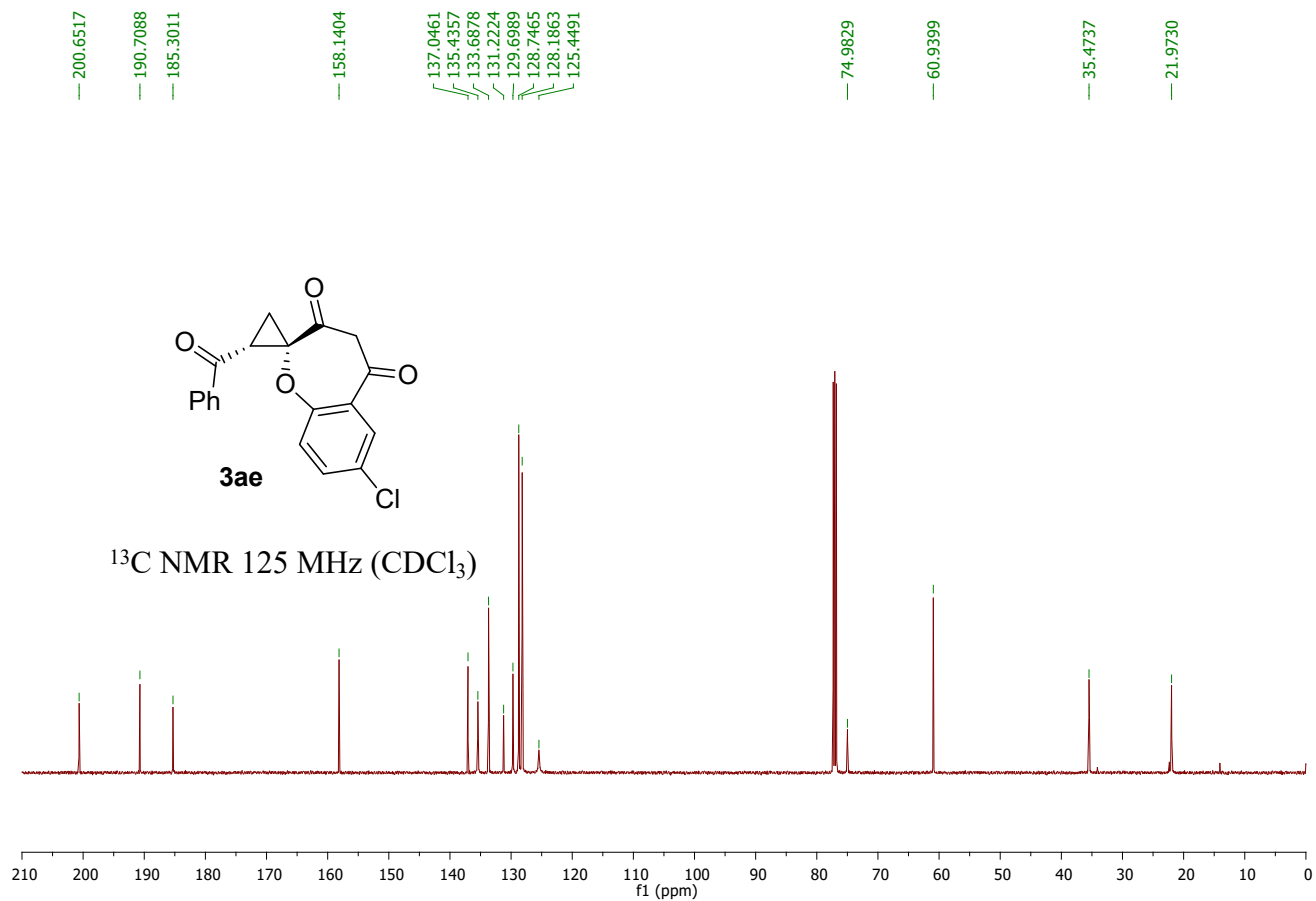



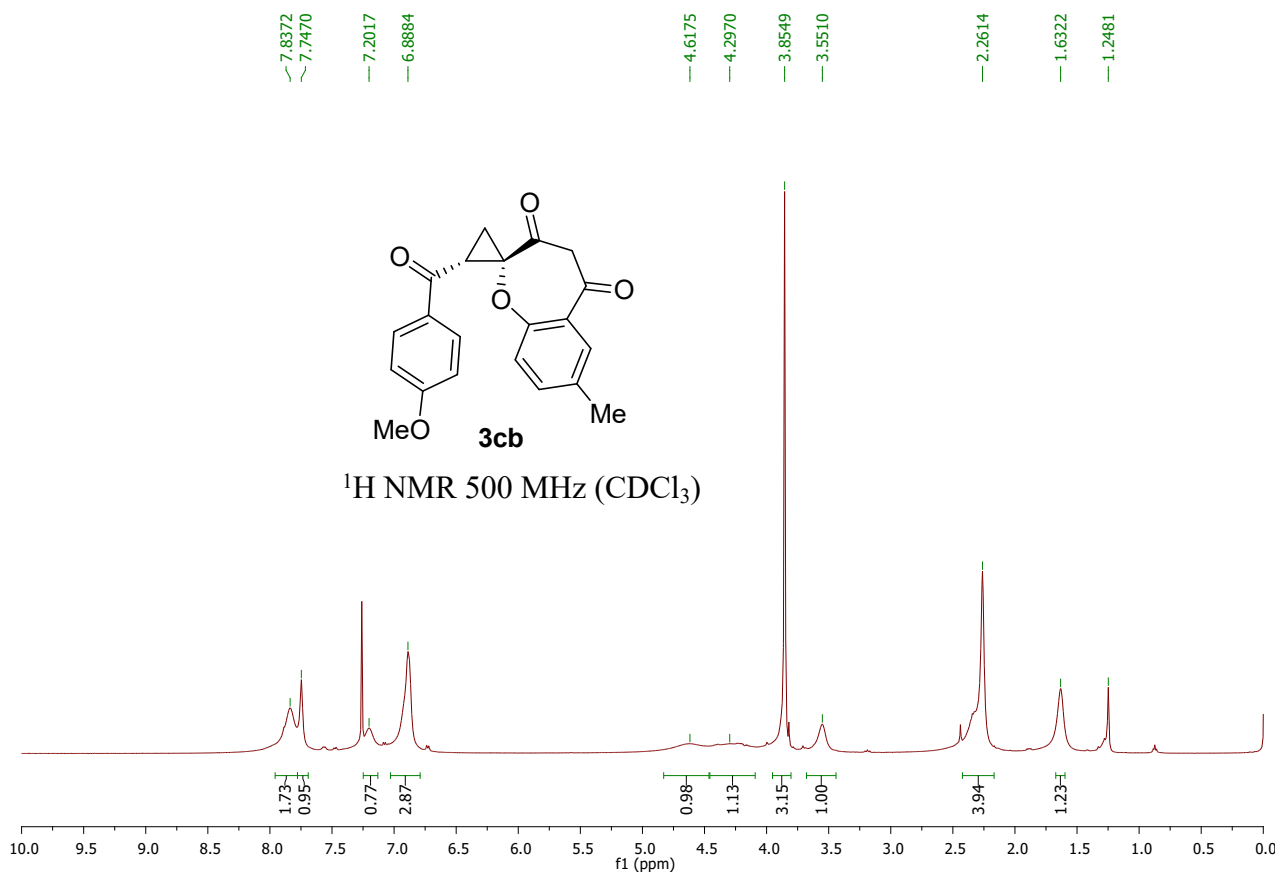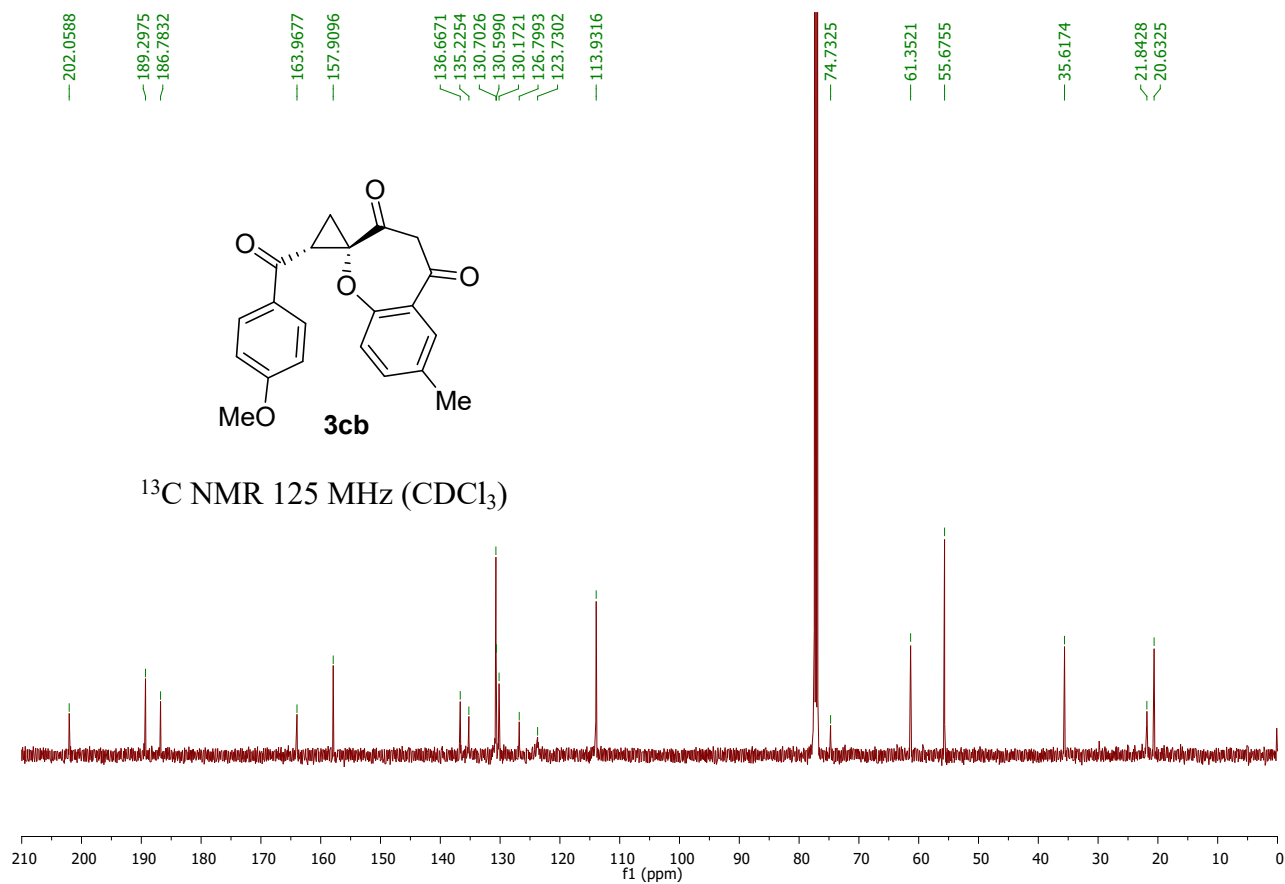

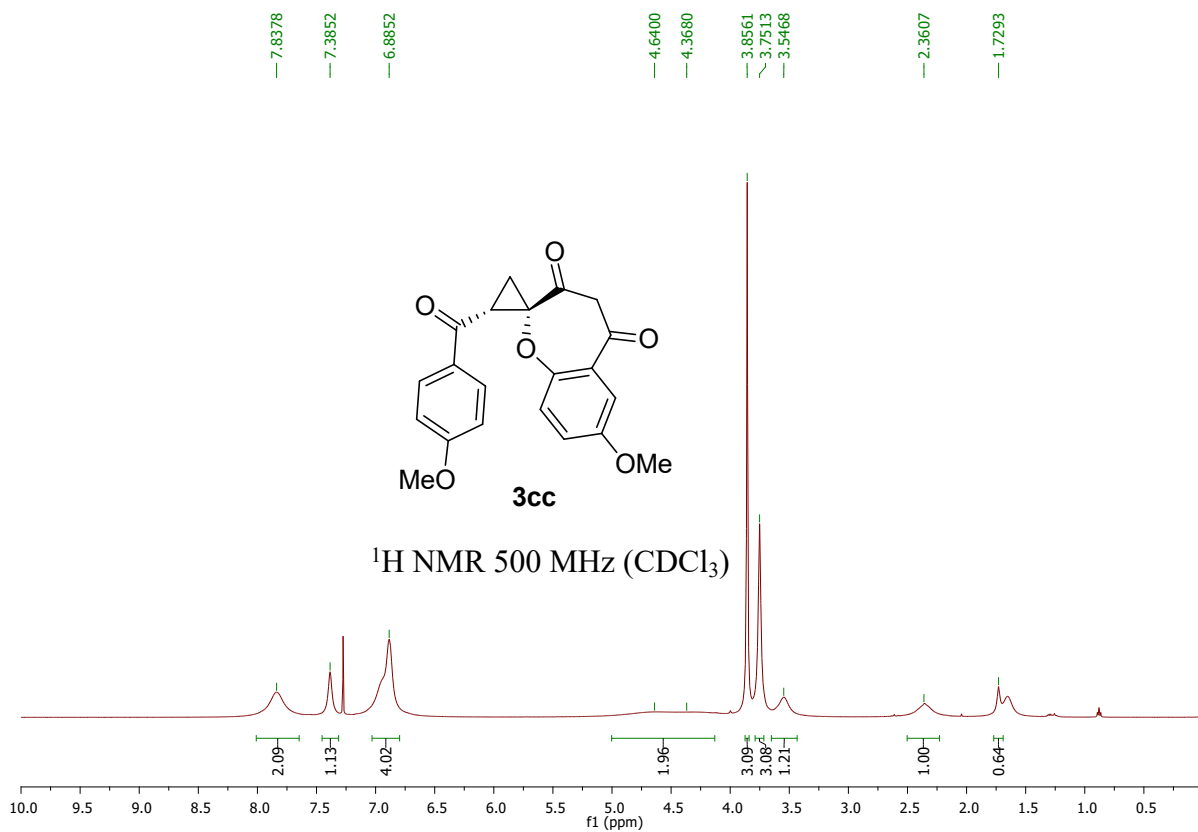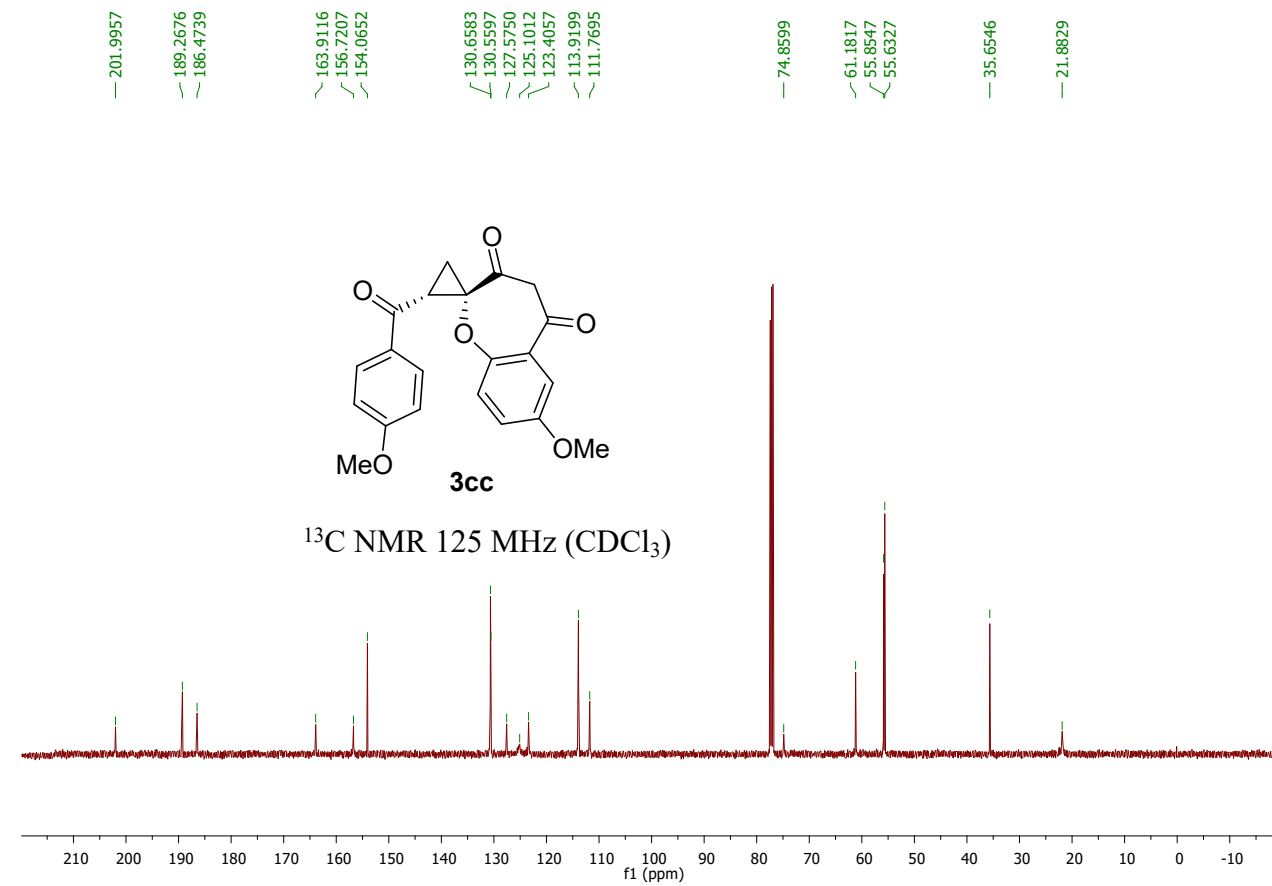

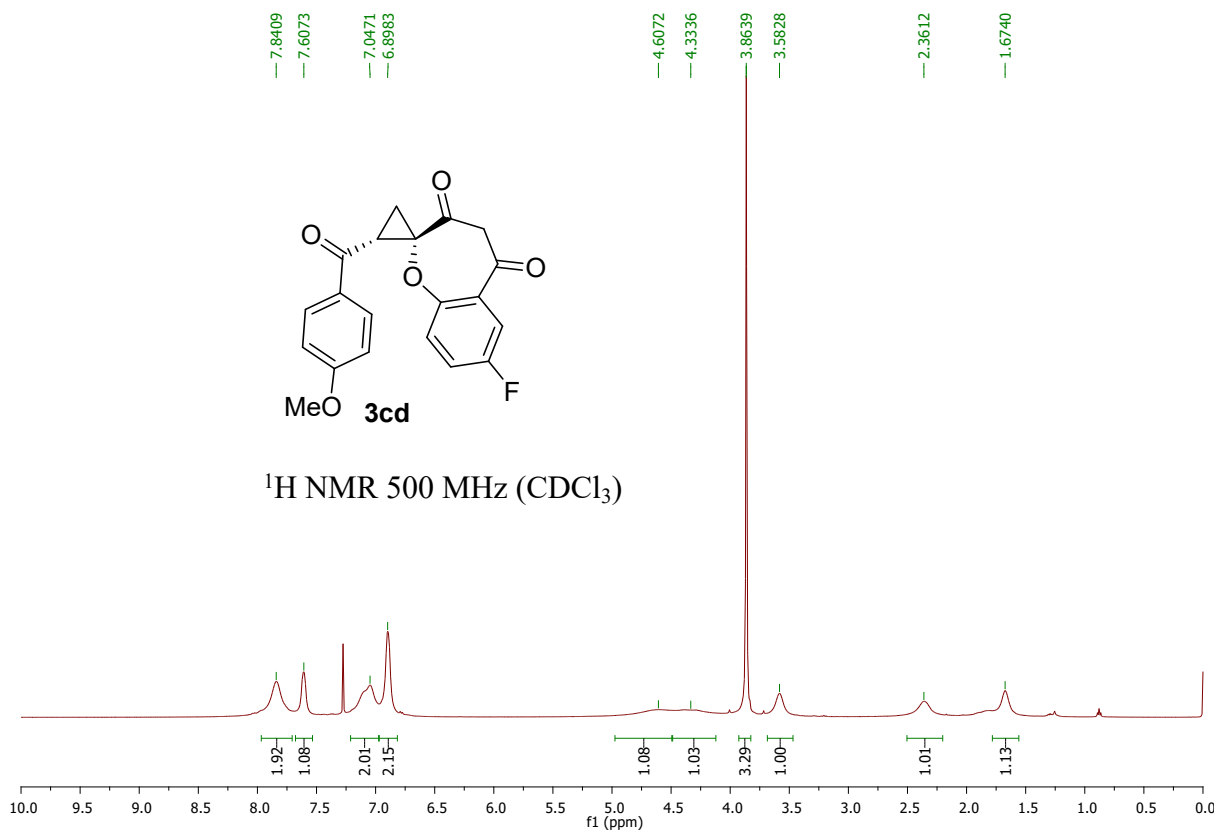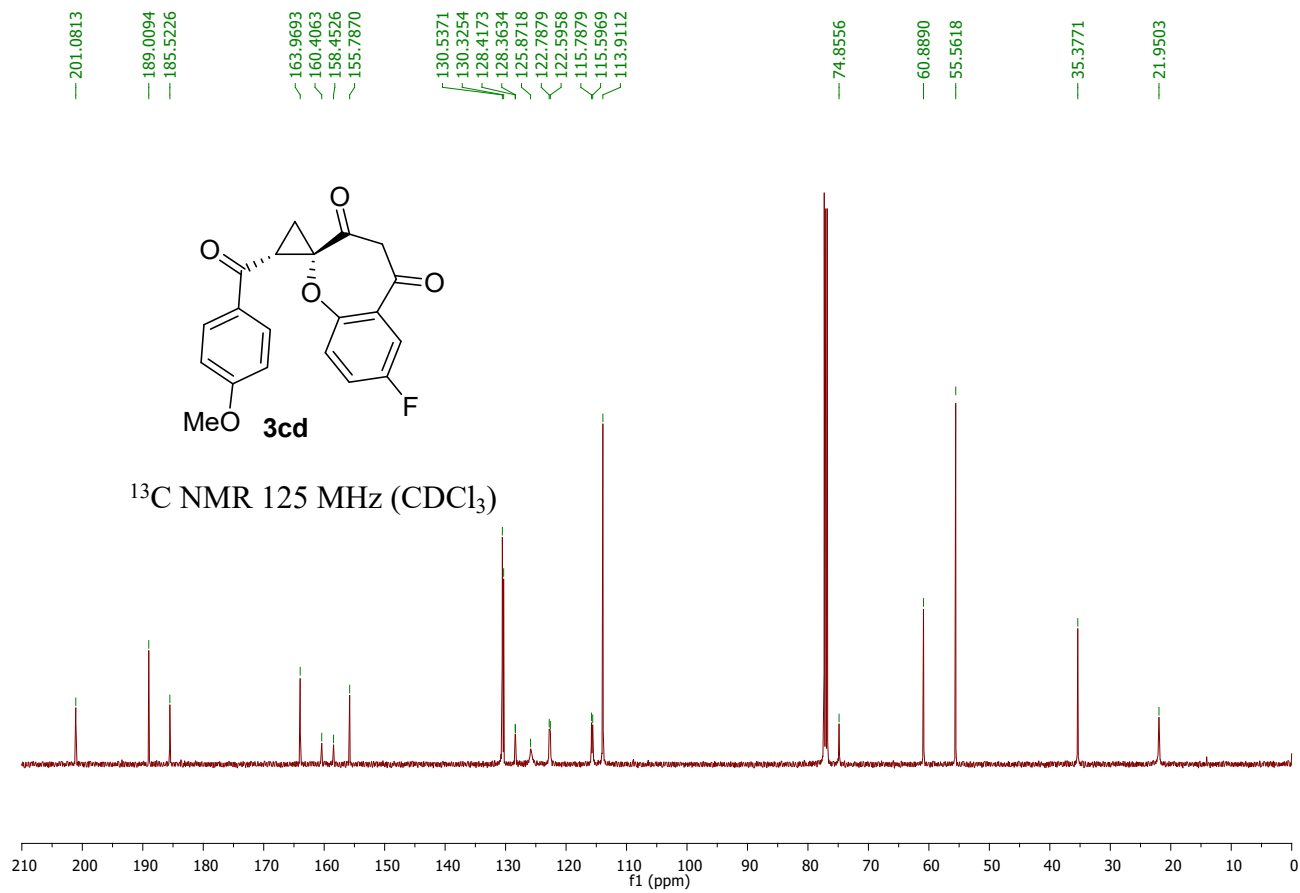

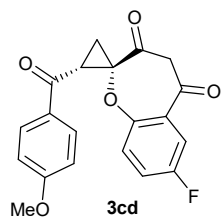

$^{19}\text{F}$  NMR 470 MHz ( $\text{CDCl}_3$ )

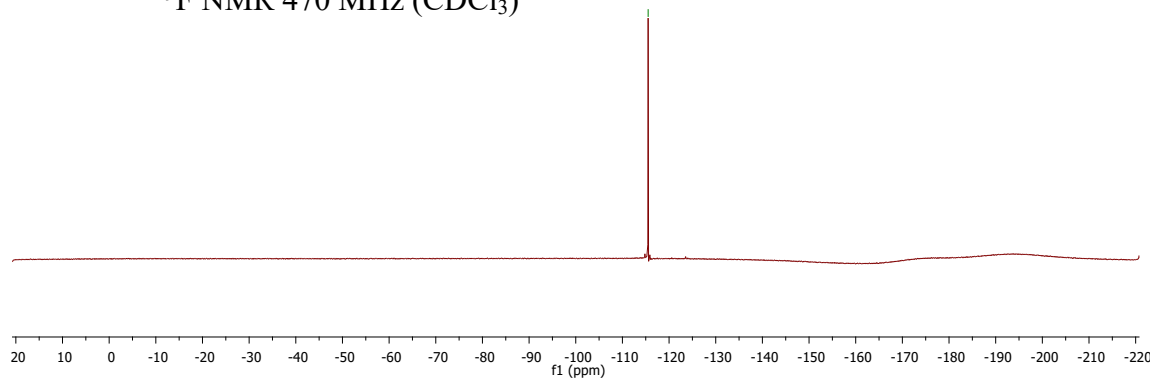

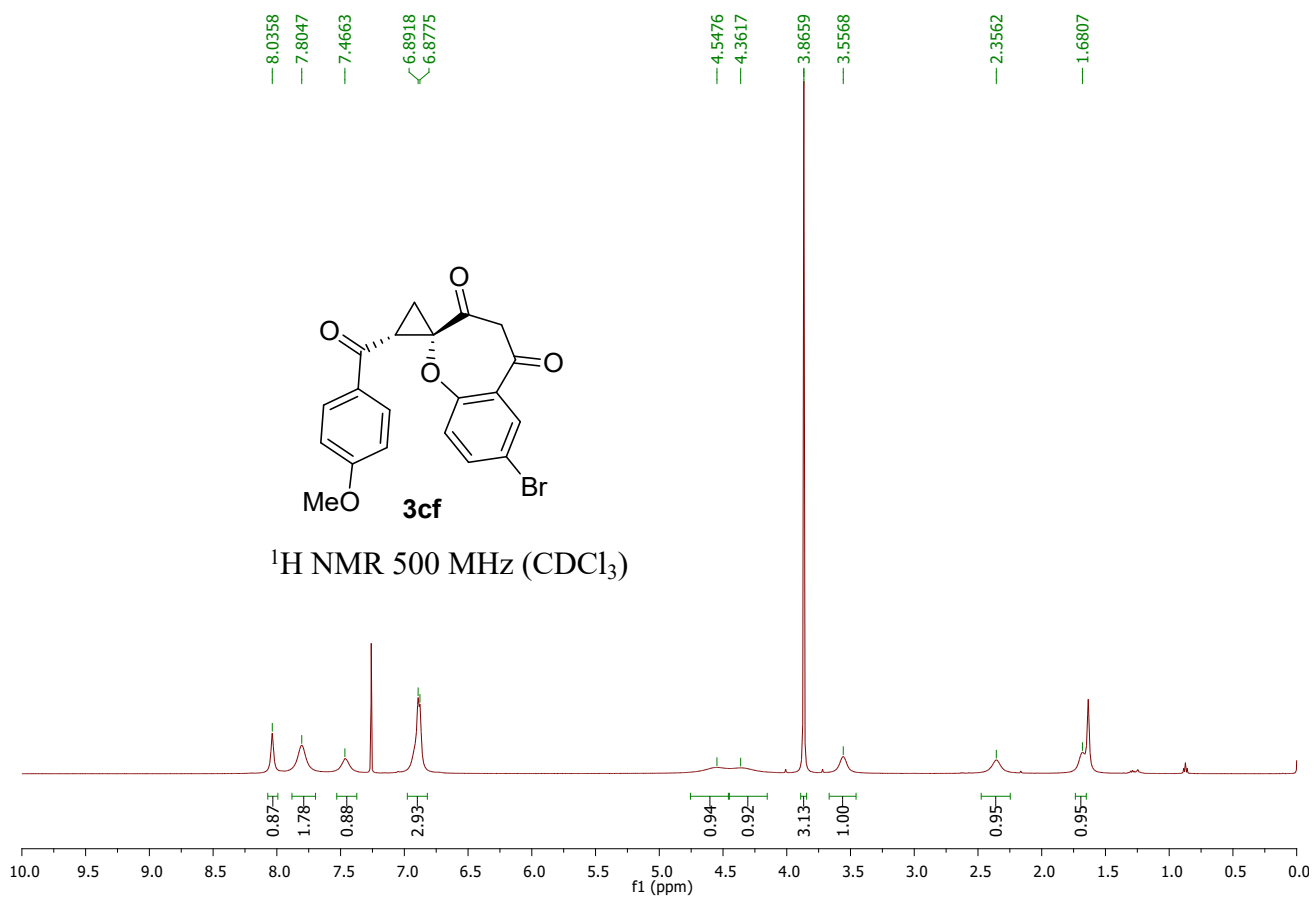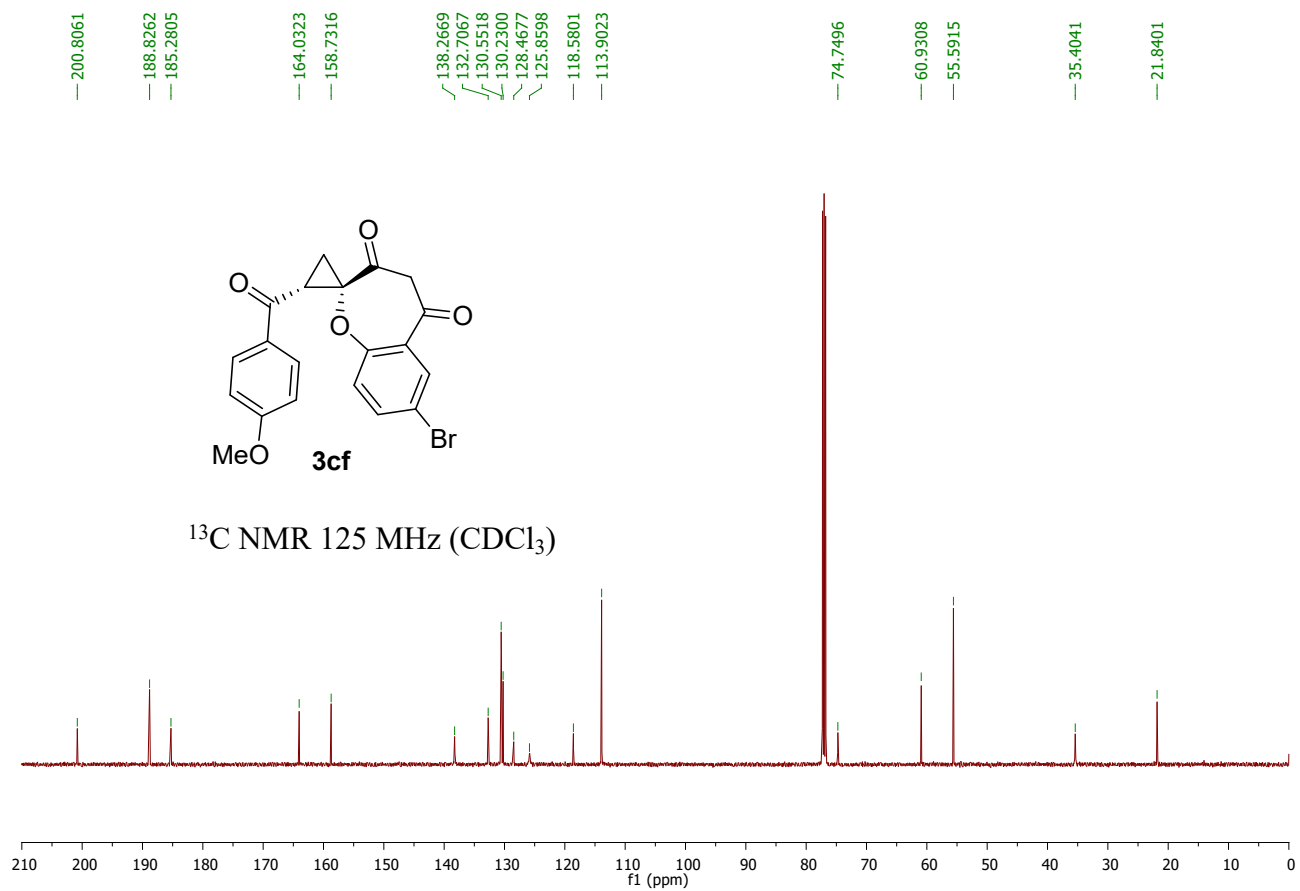

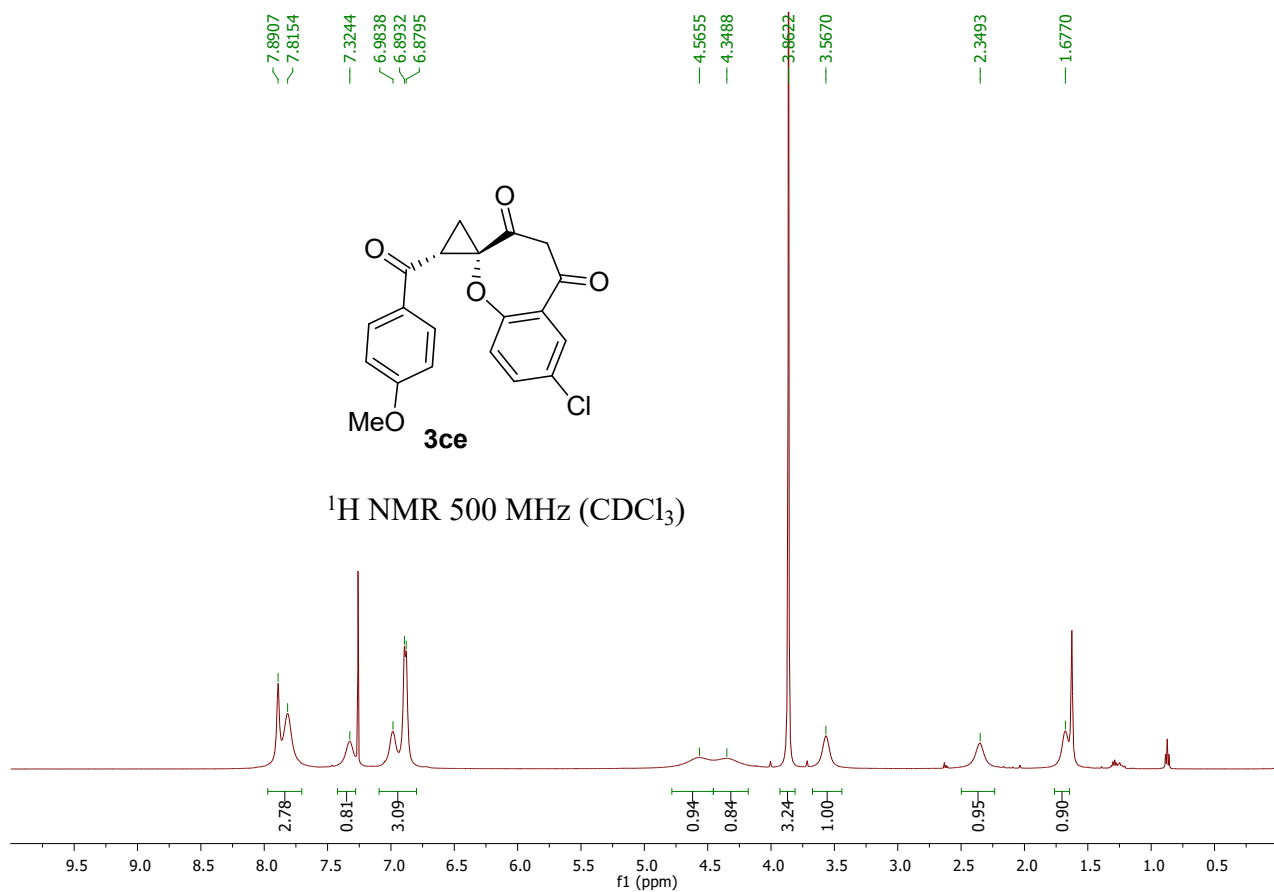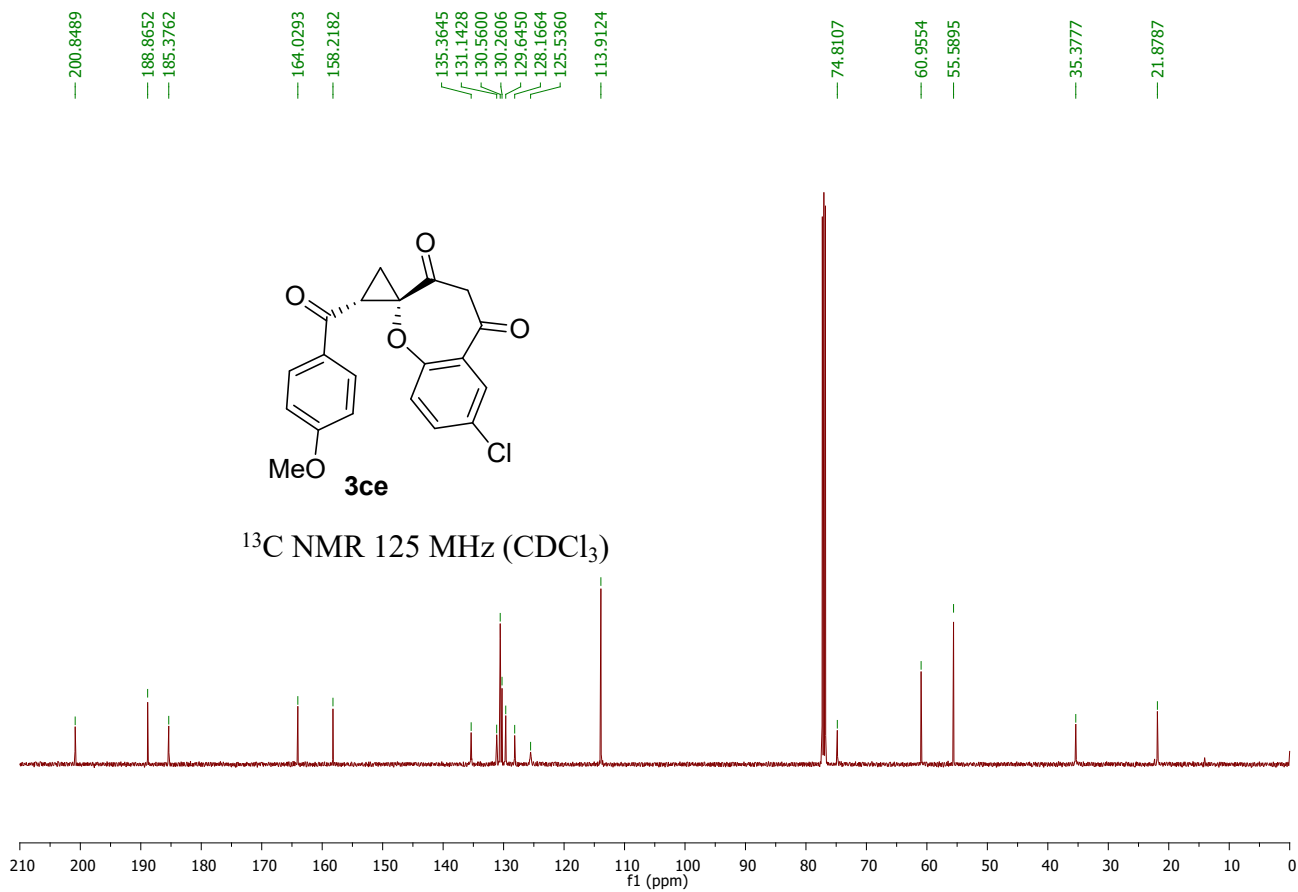

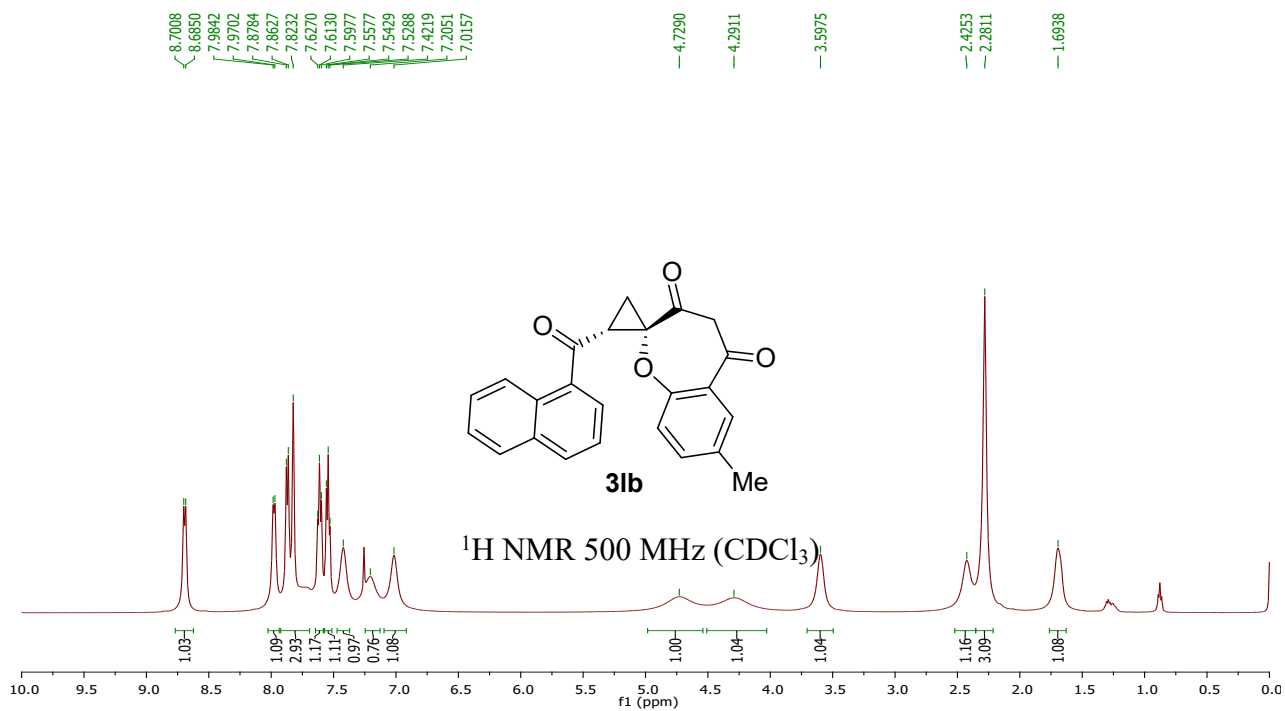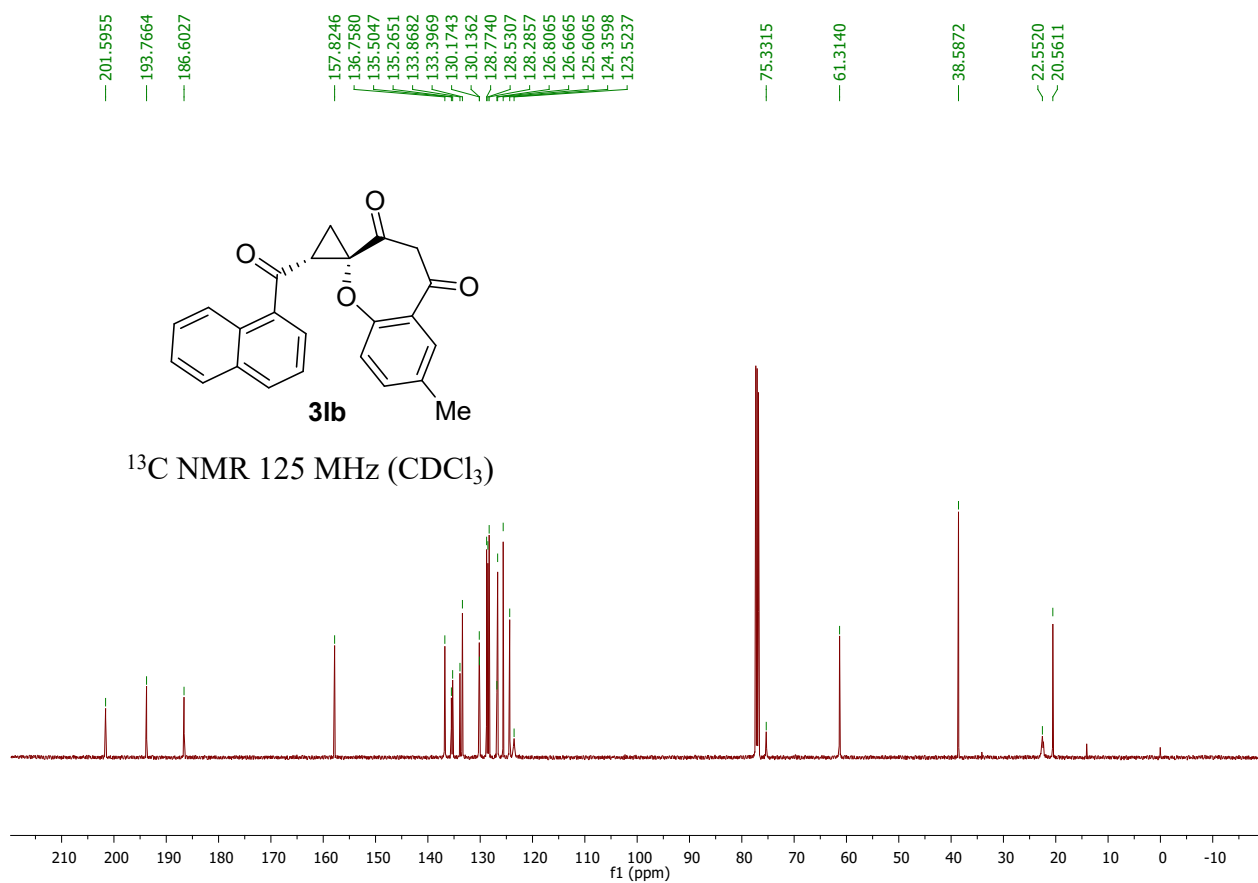

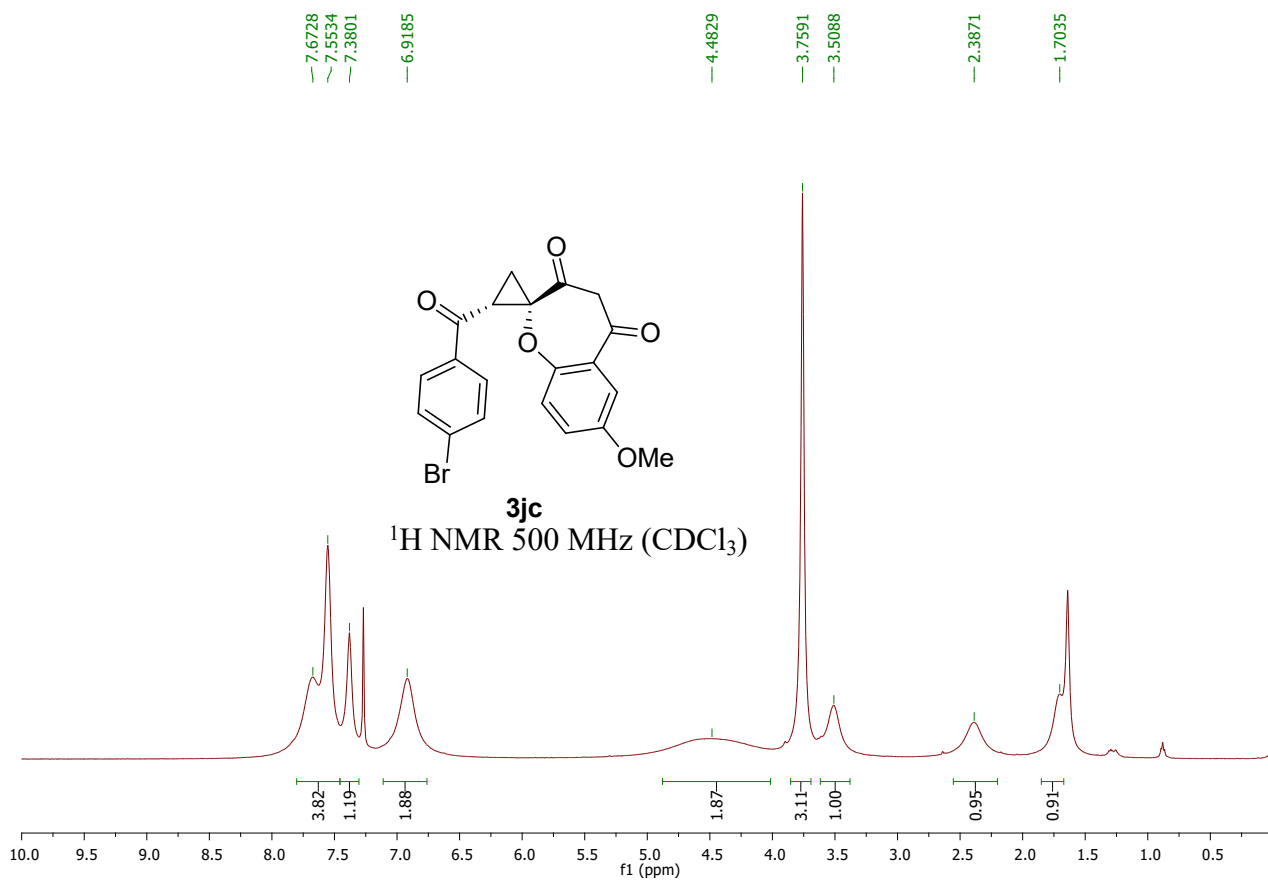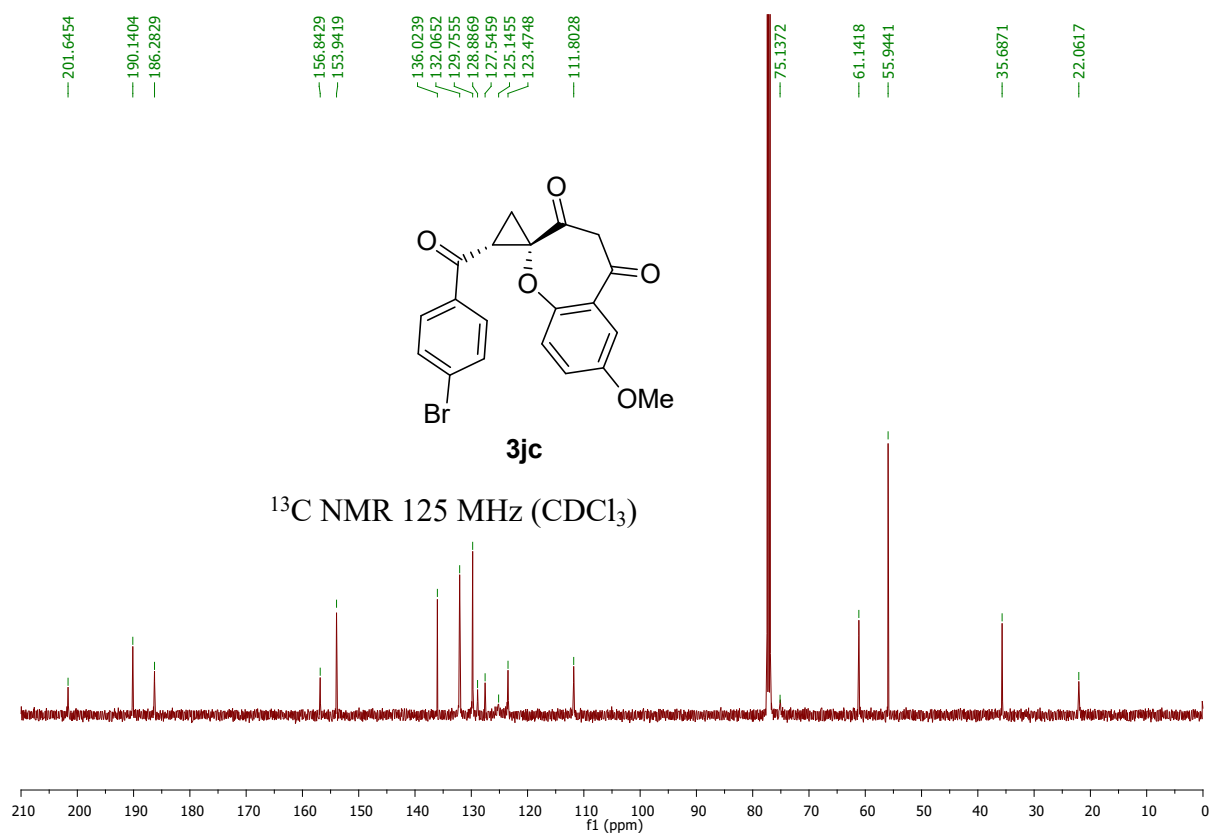



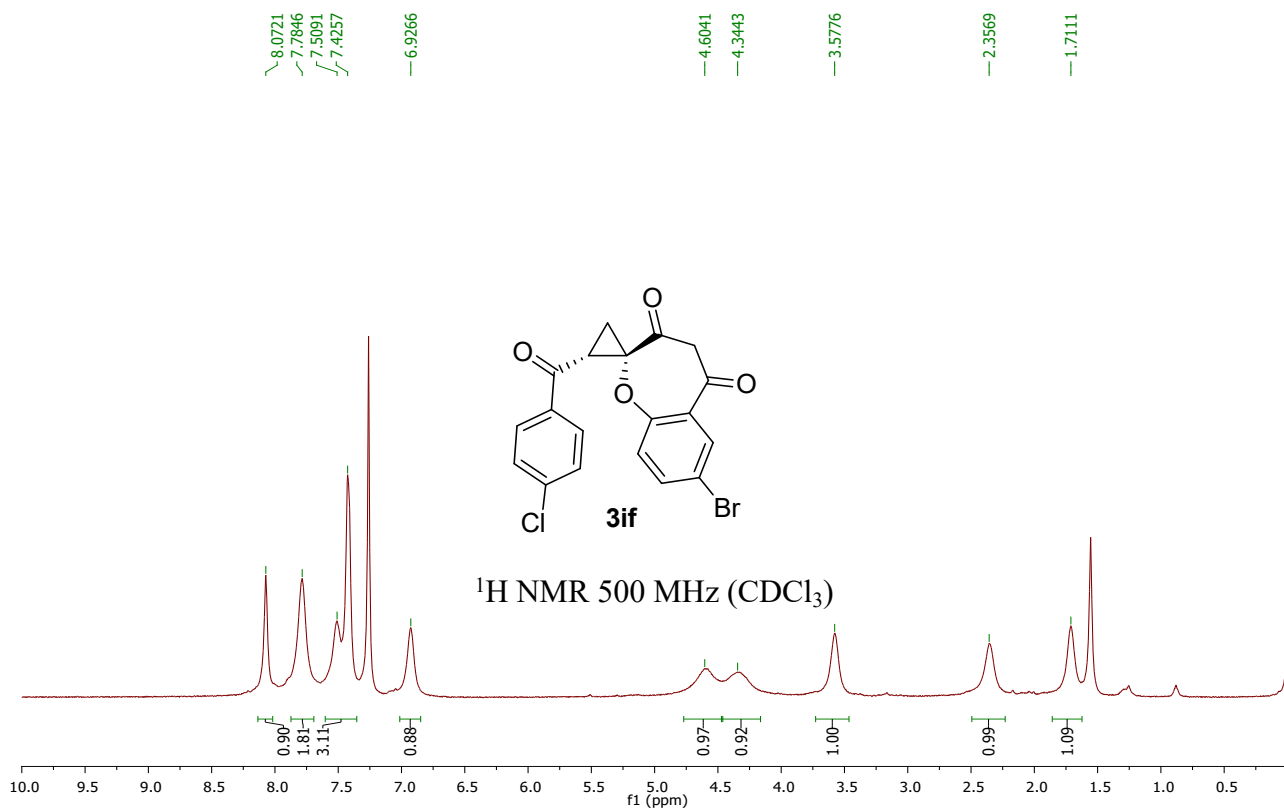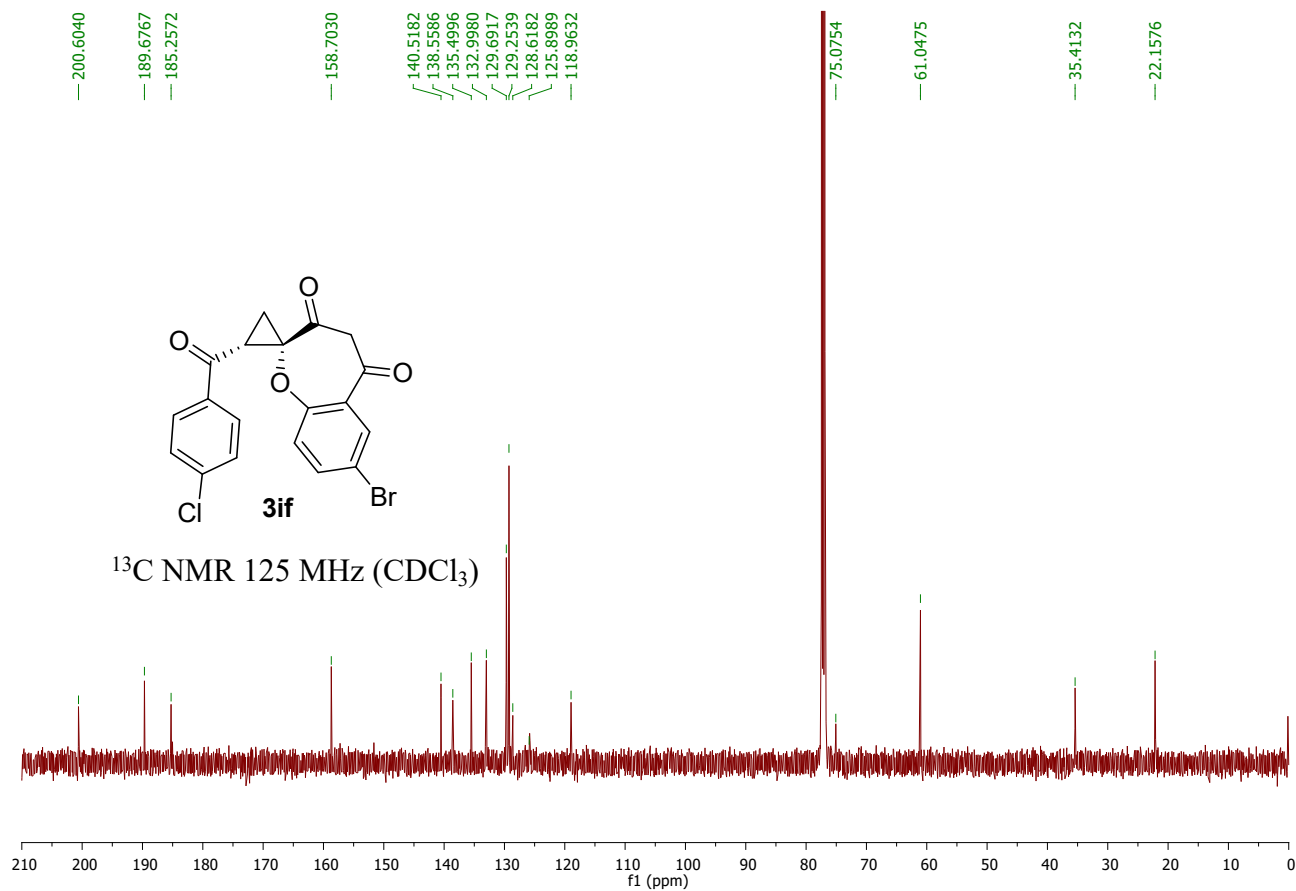

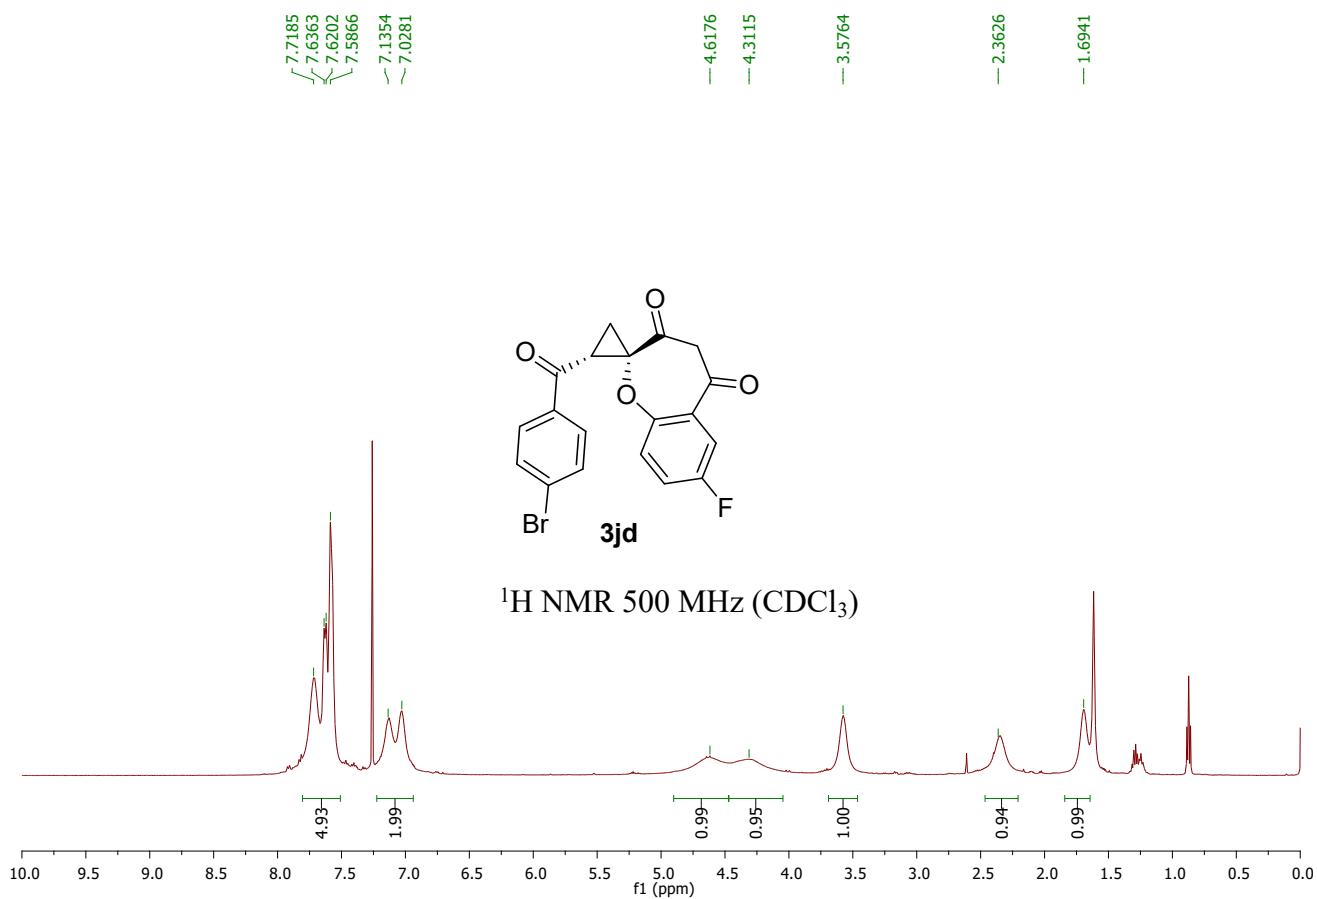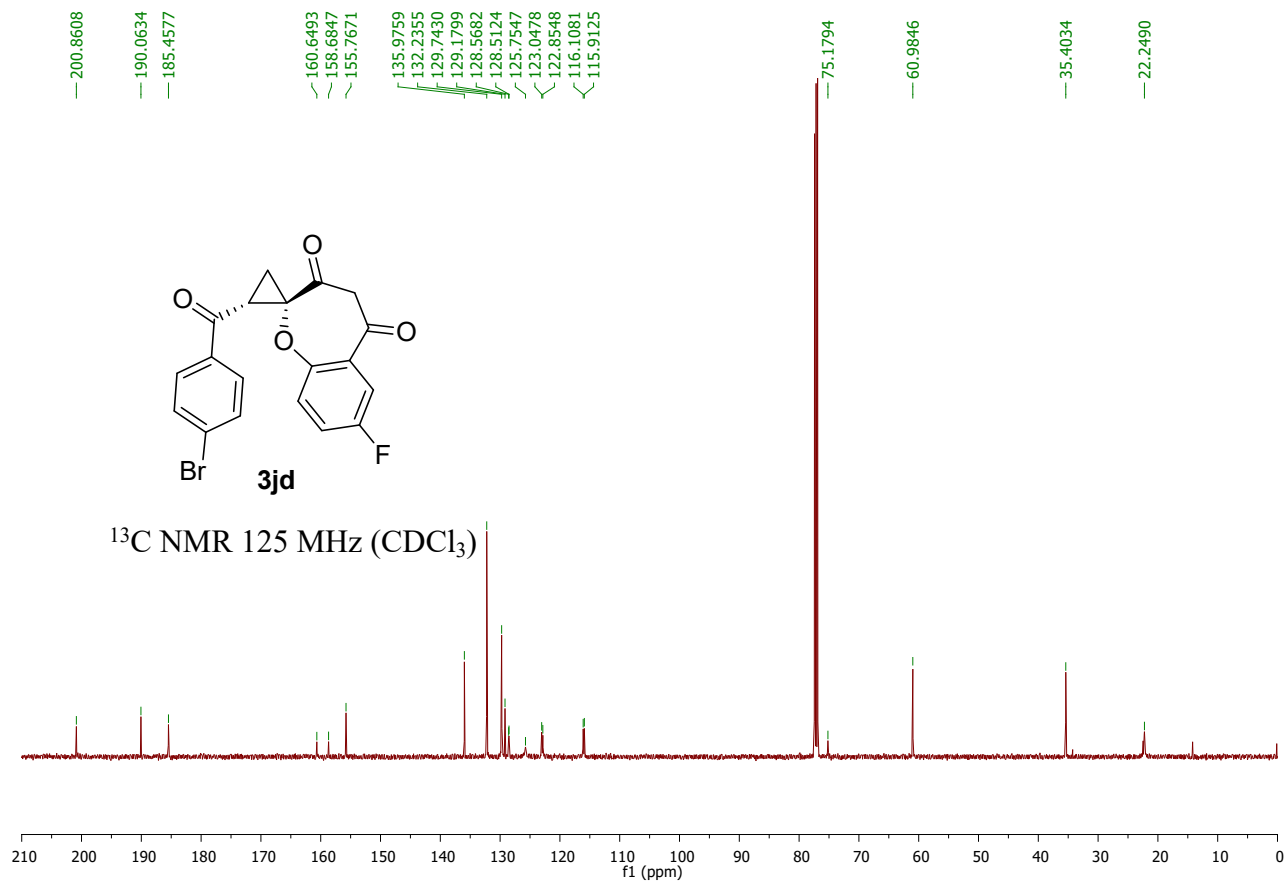

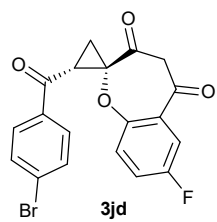

$^{19}\text{F}$  NMR 470 MHz ( $\text{CDCl}_3$ )

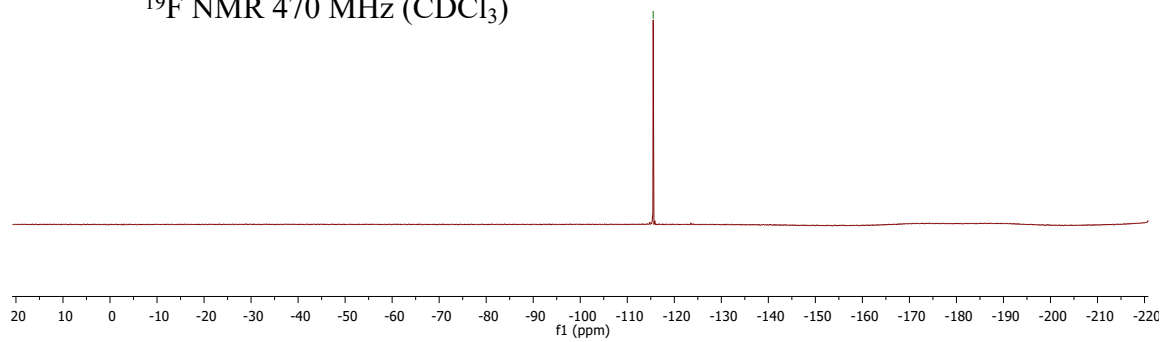

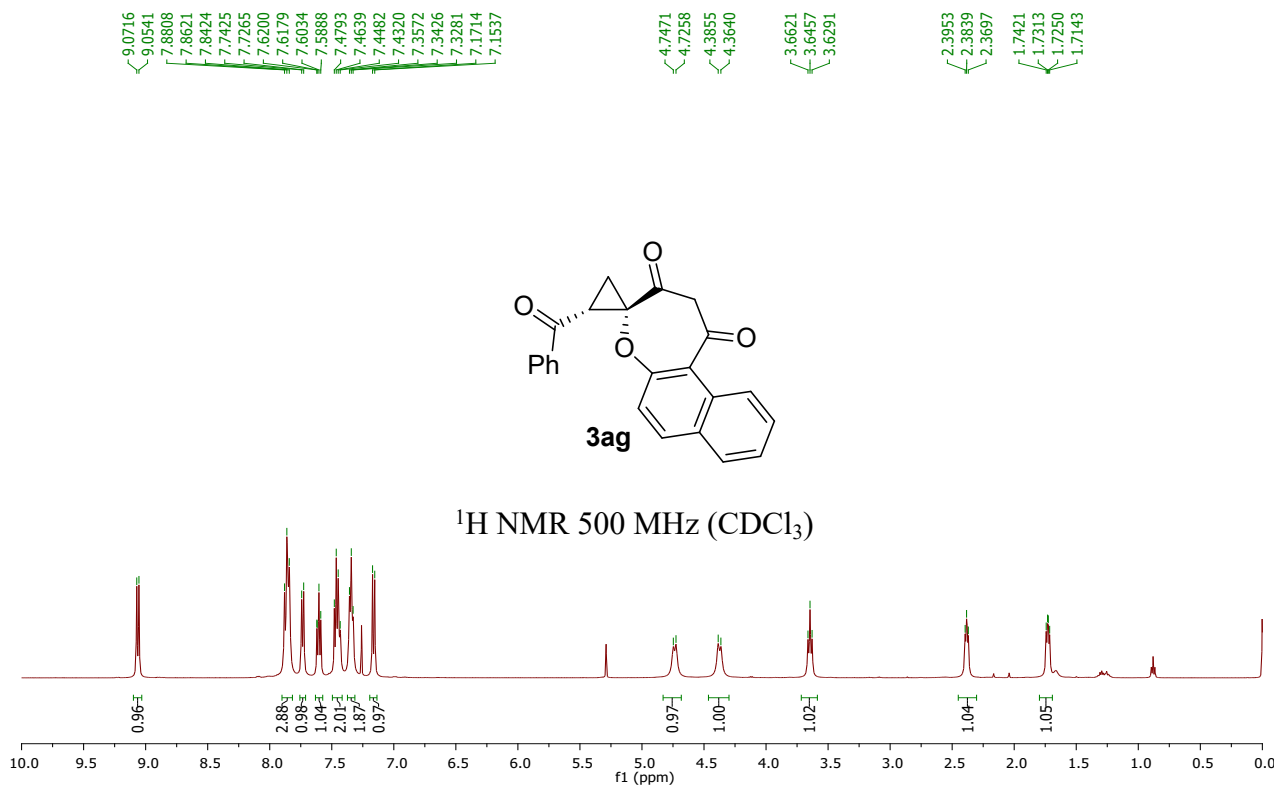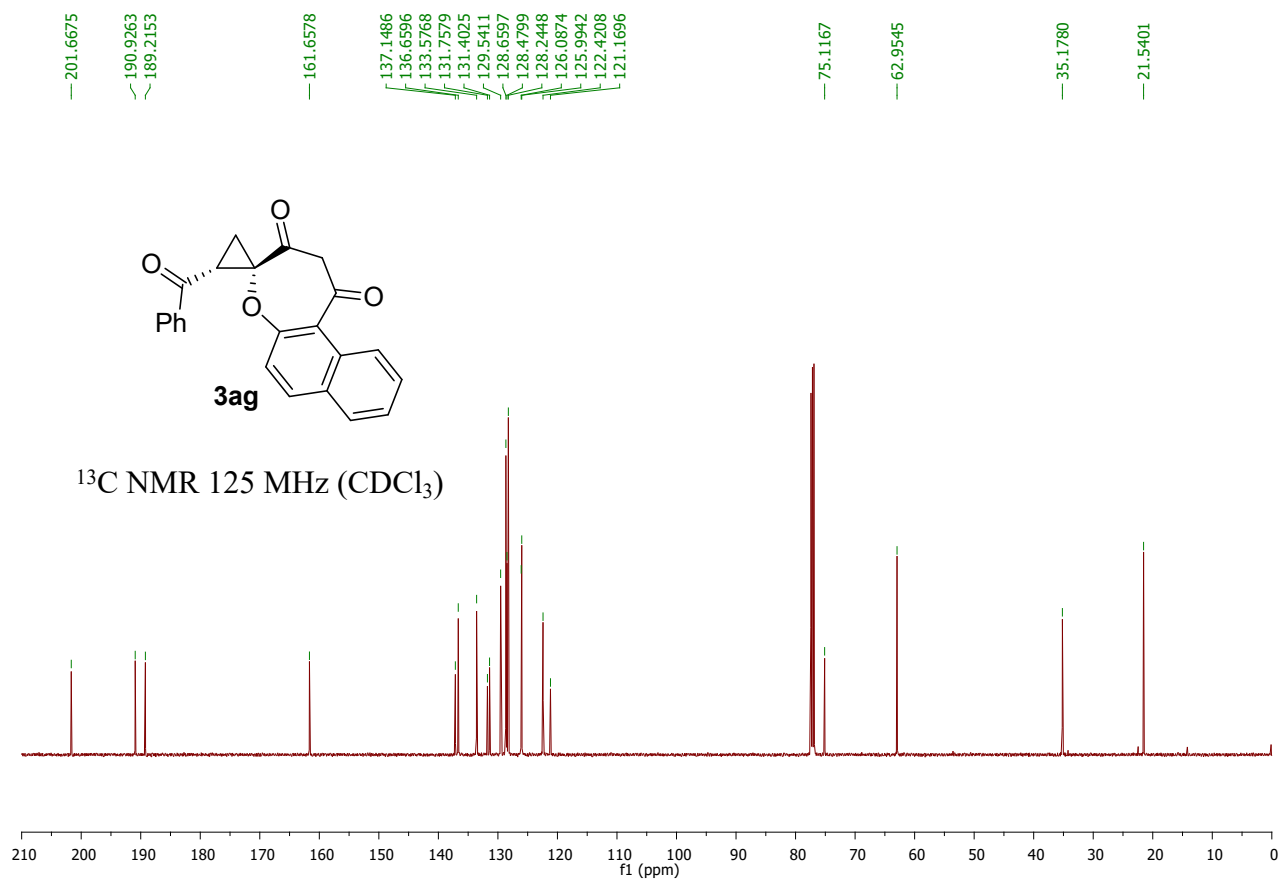

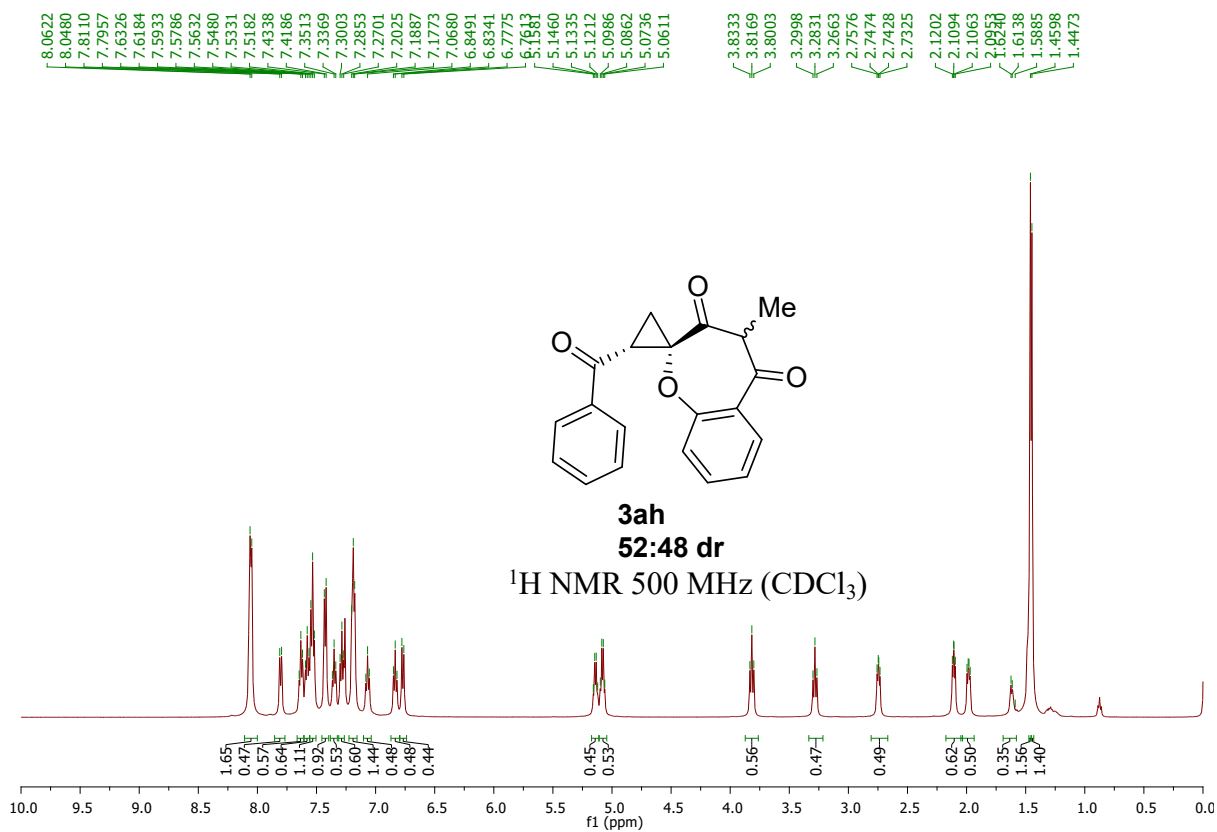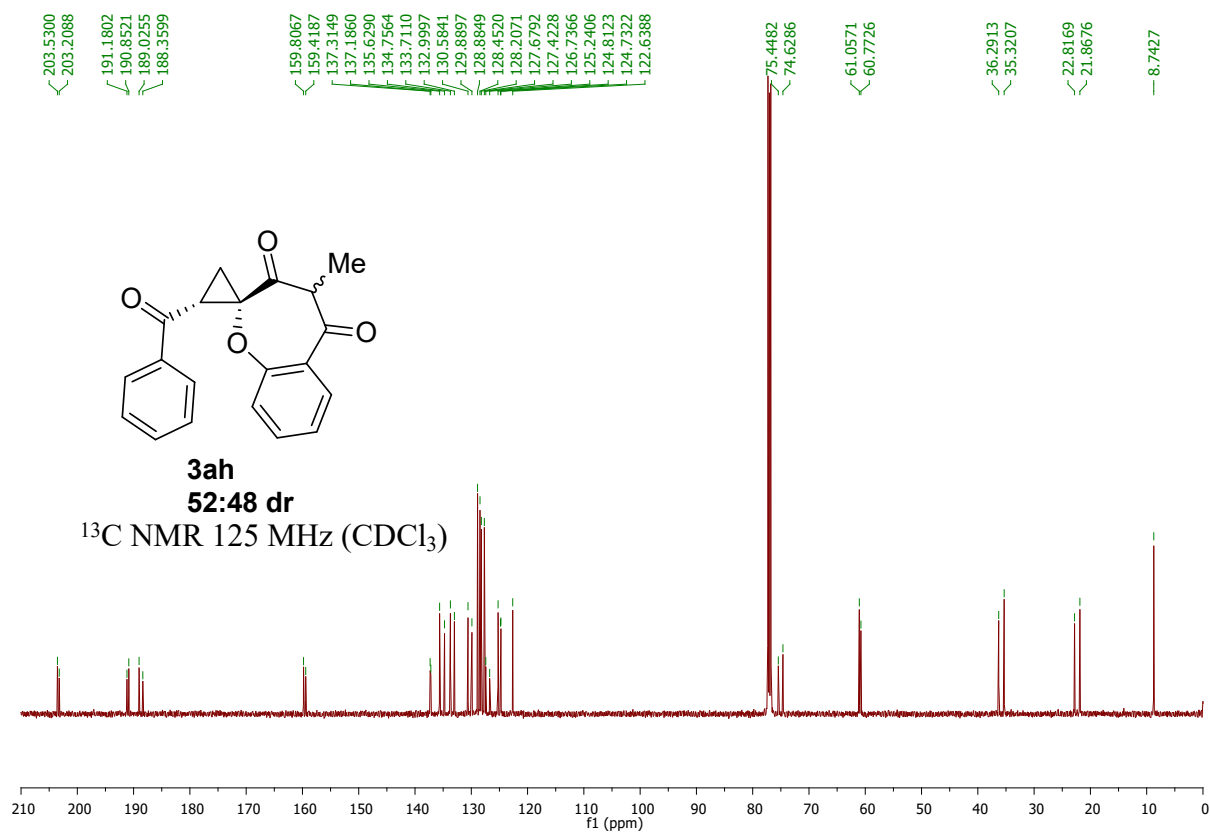

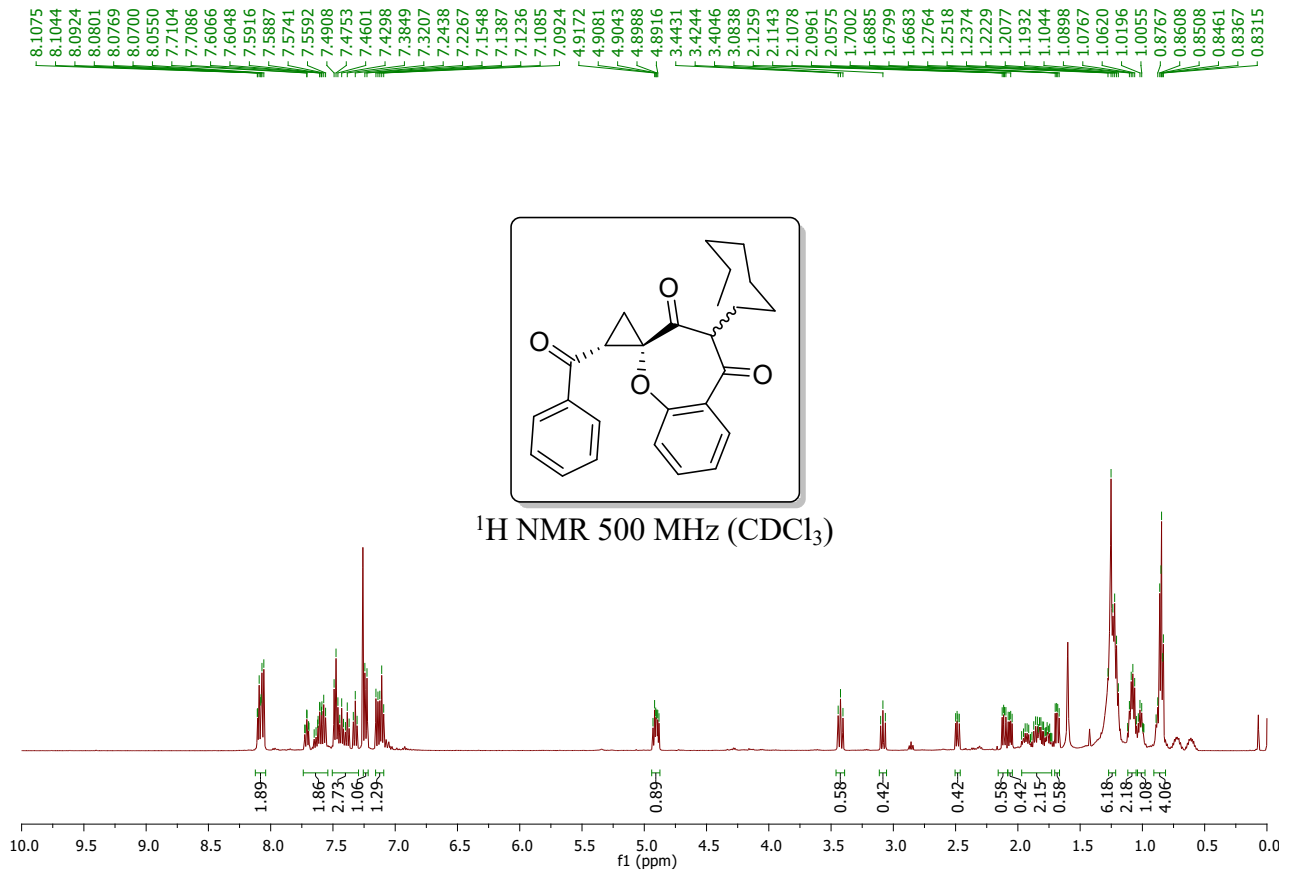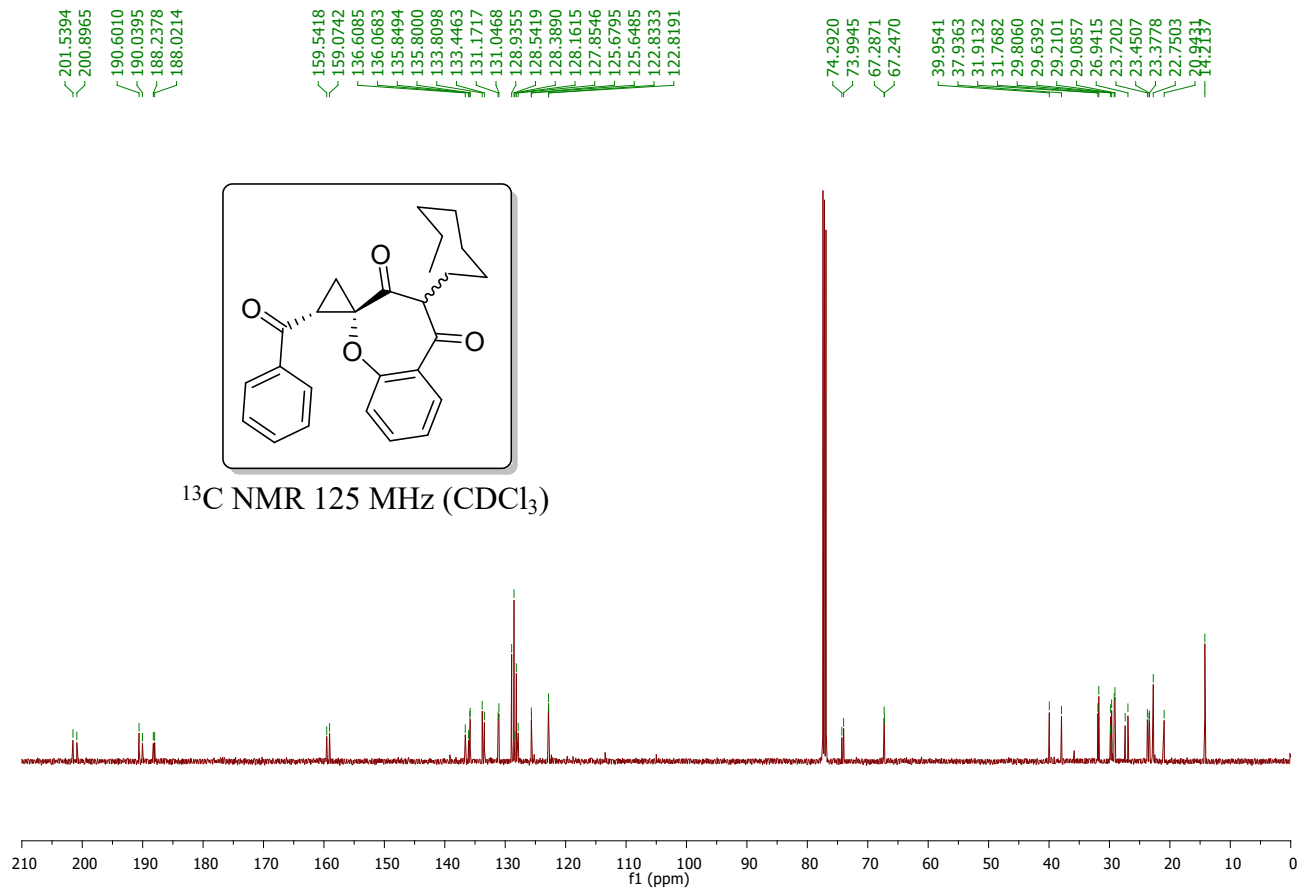

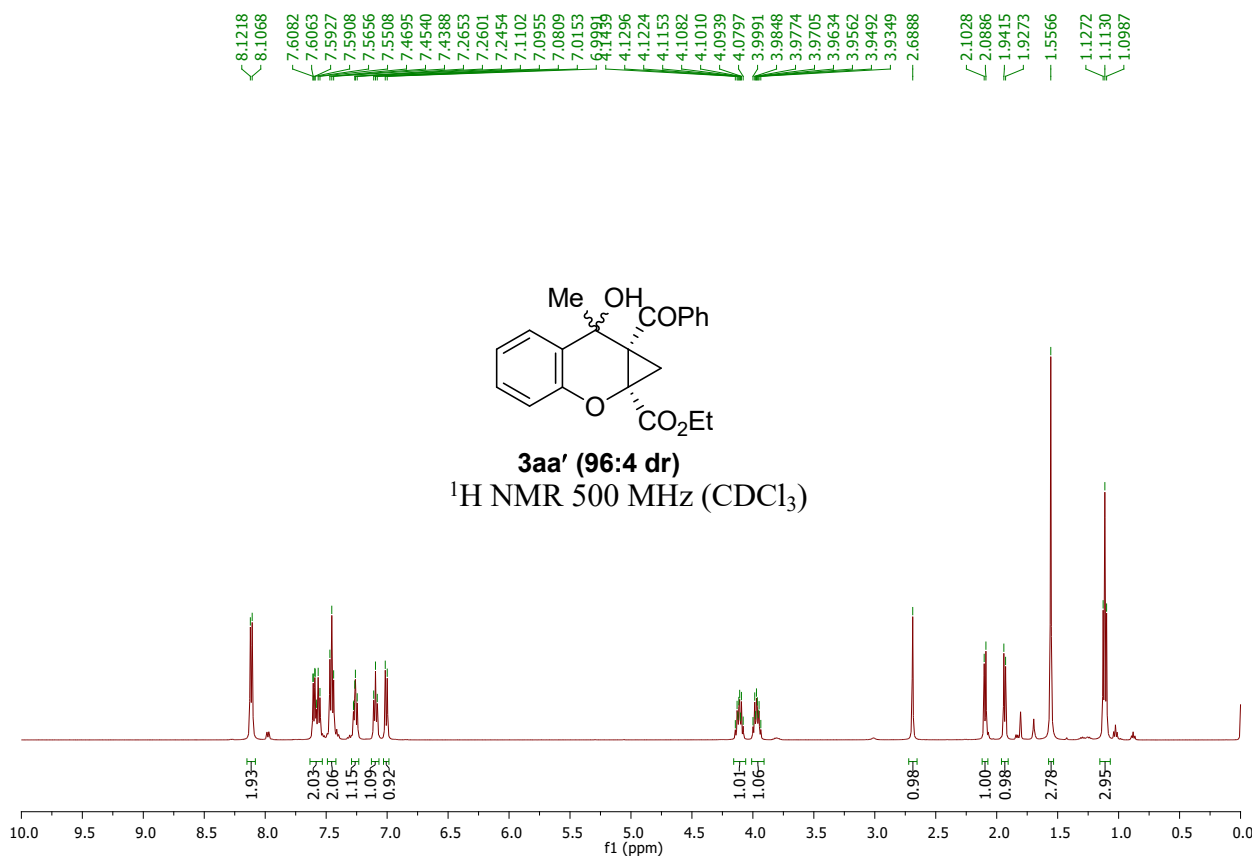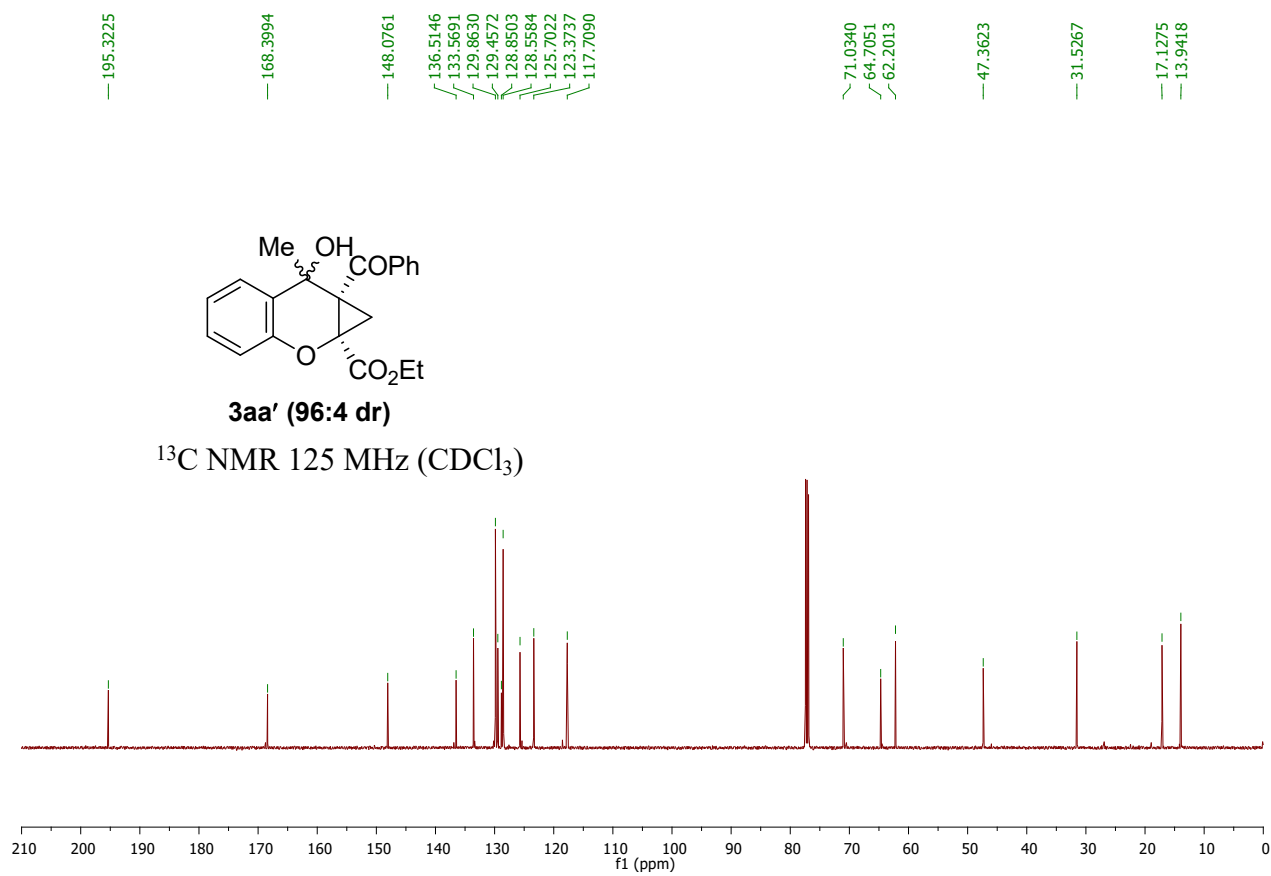

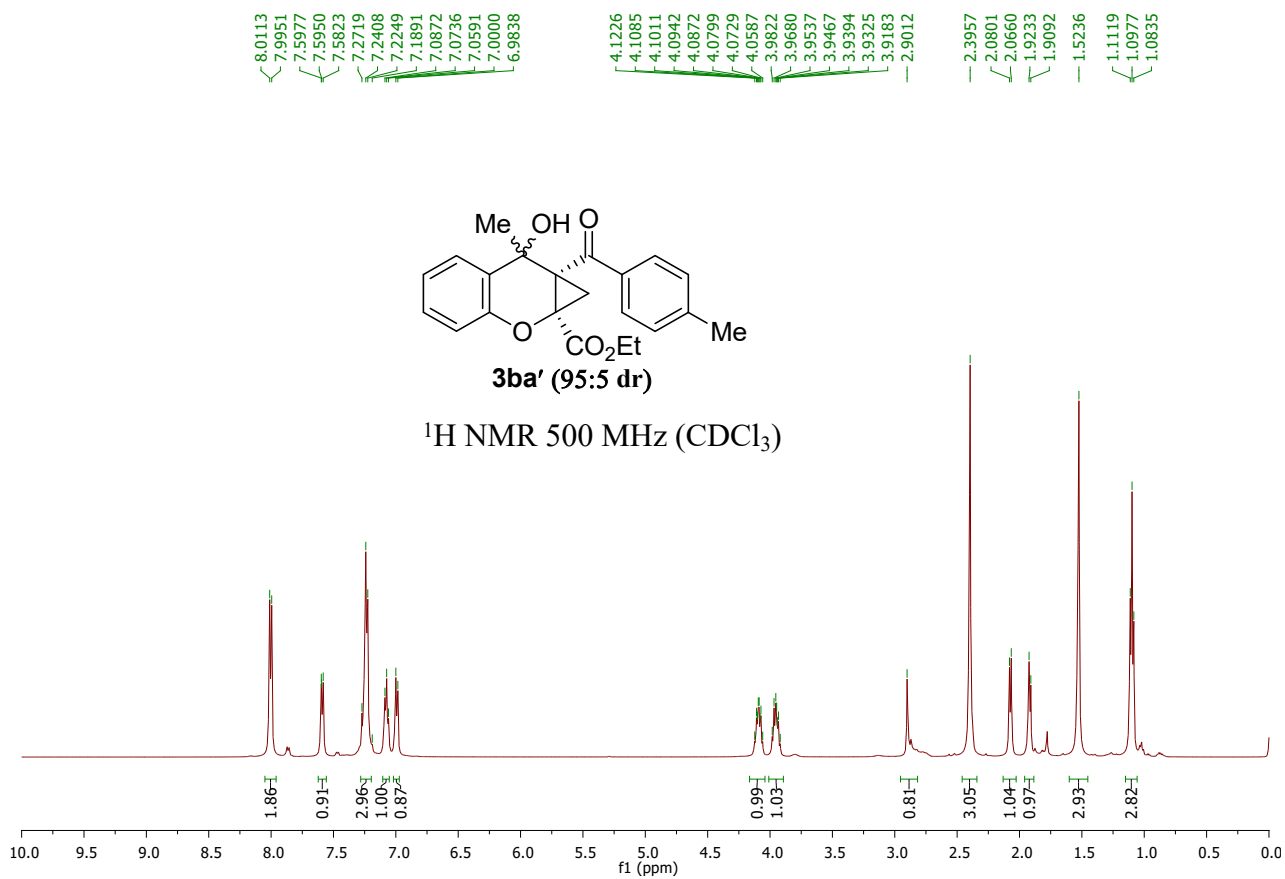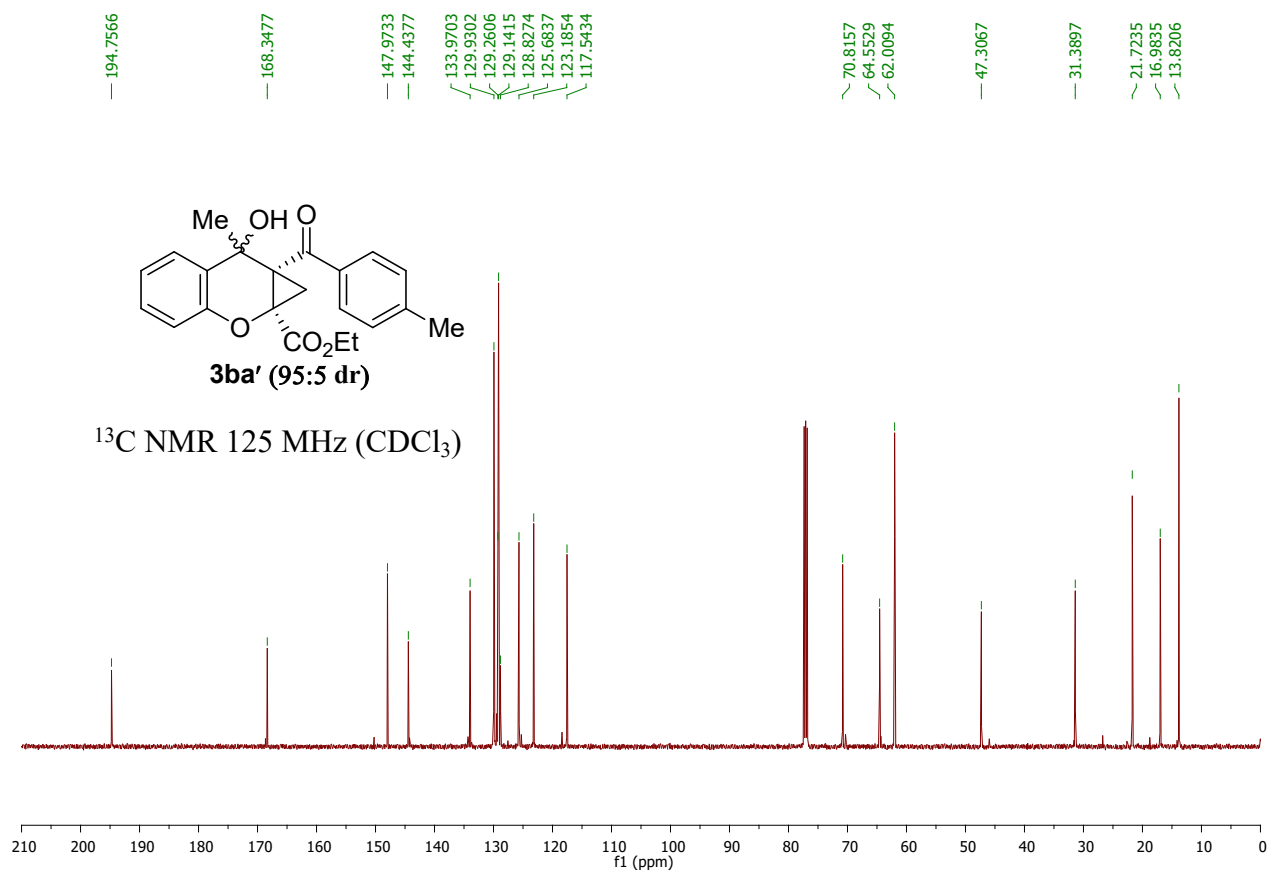



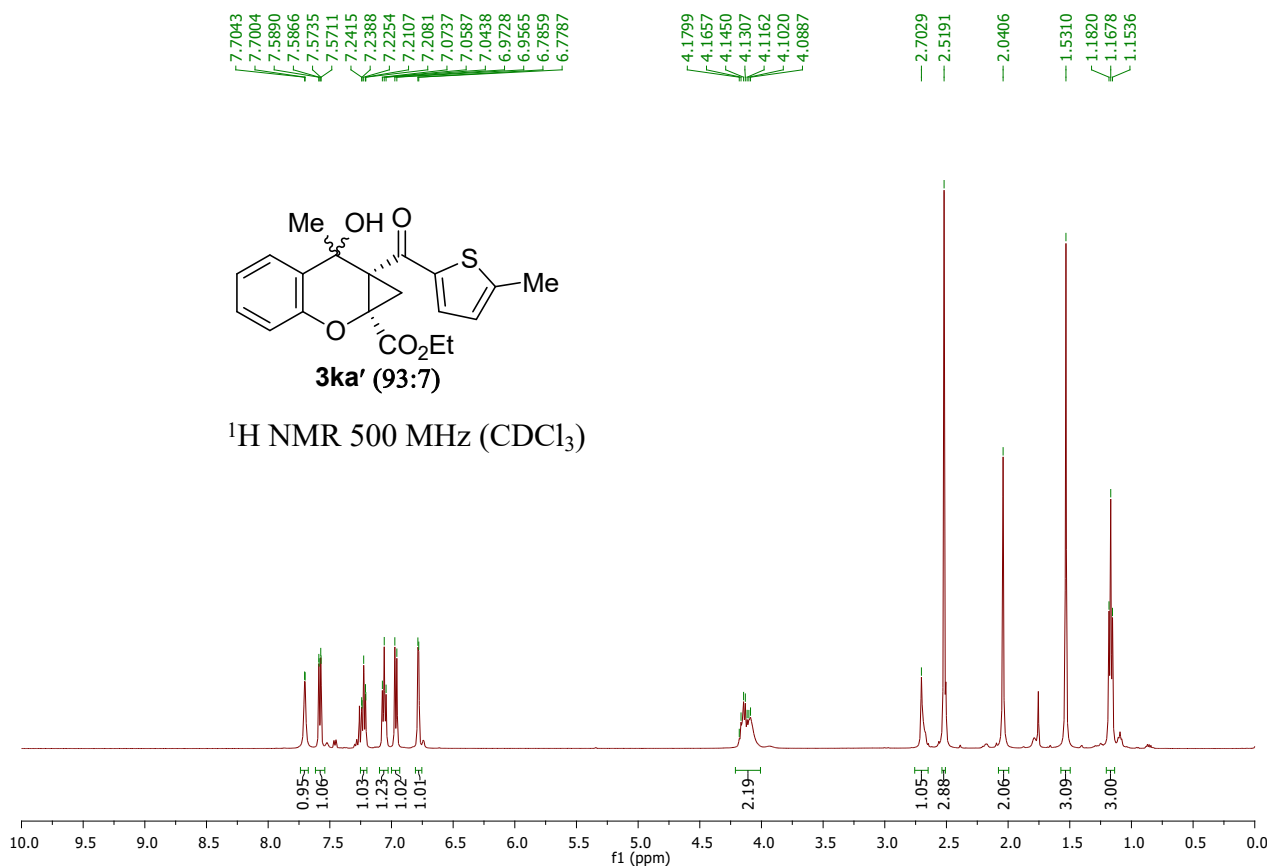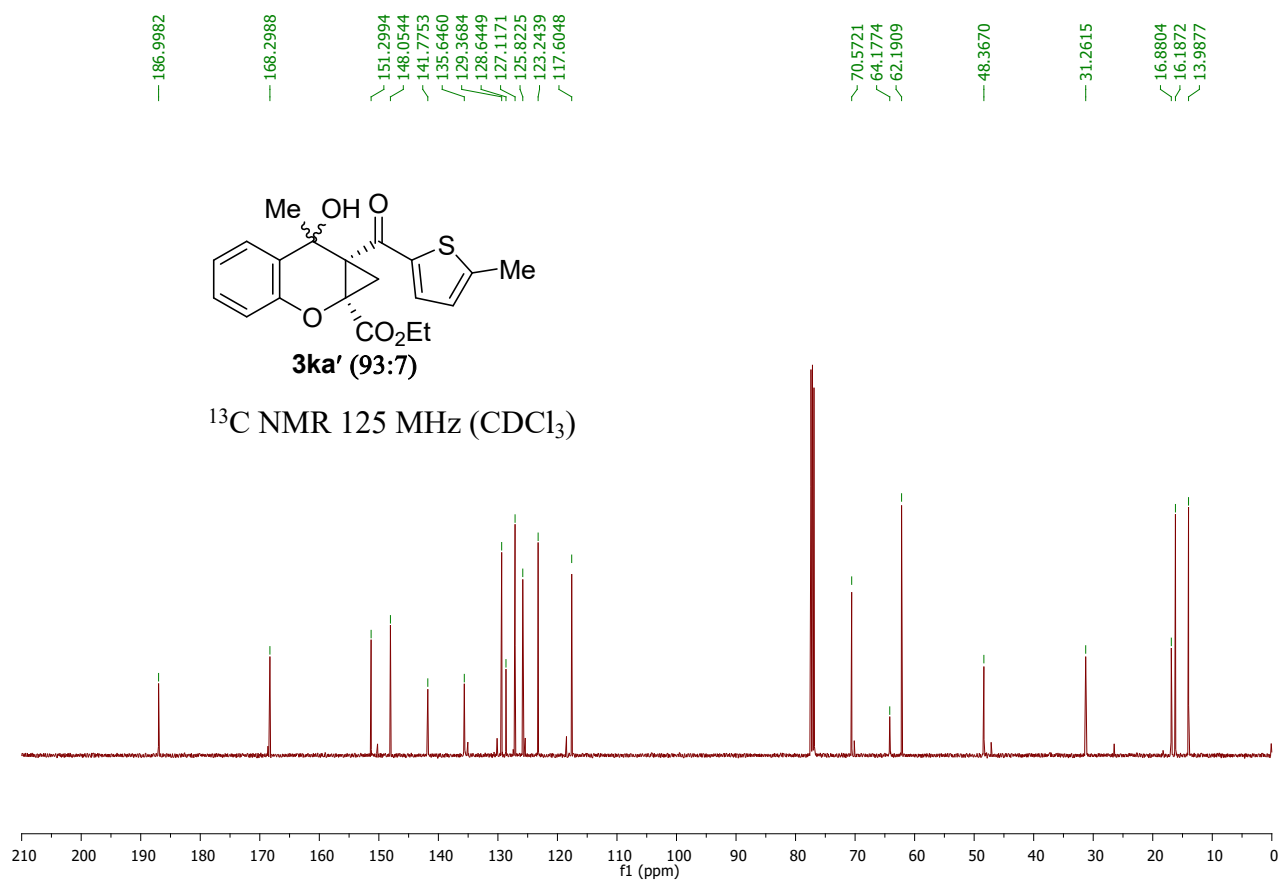

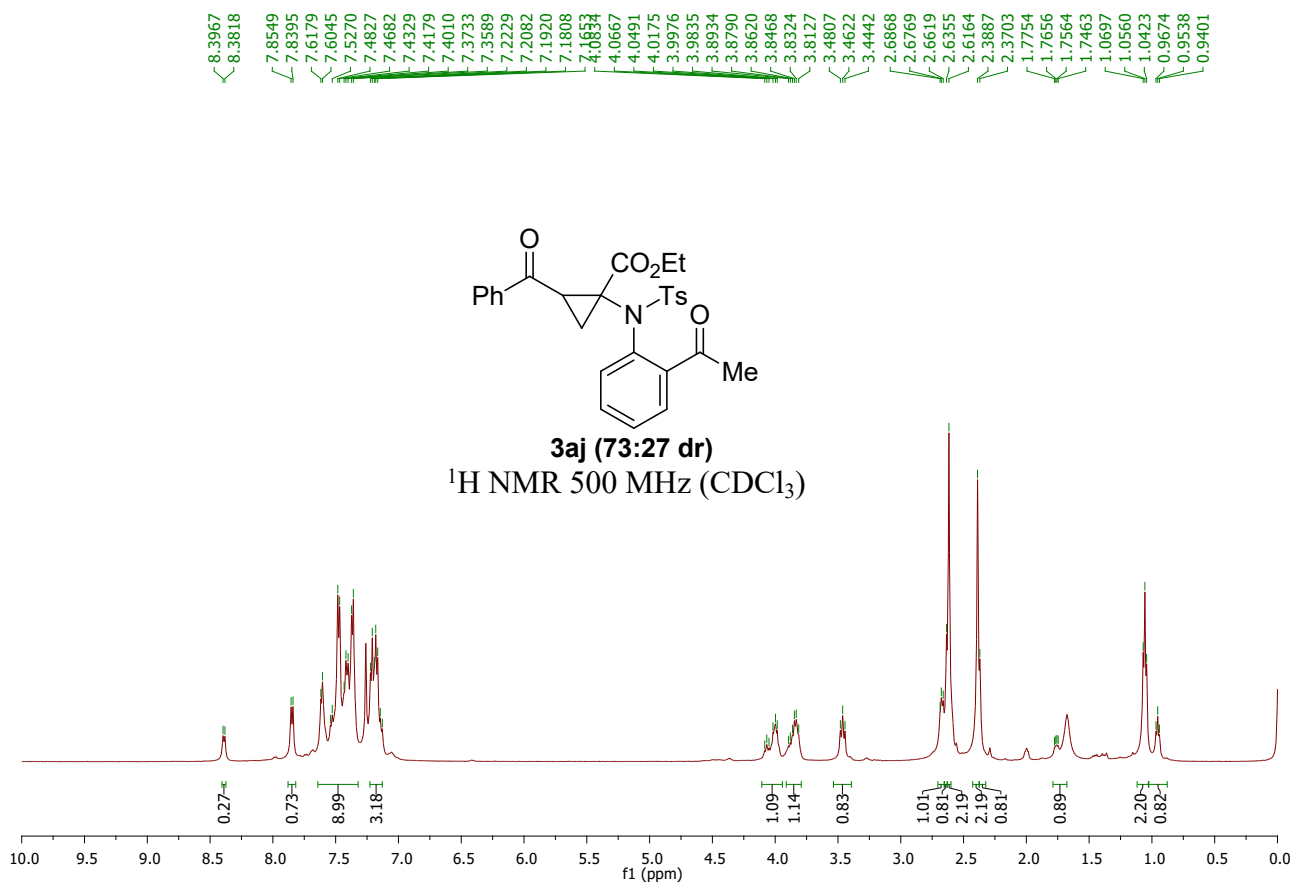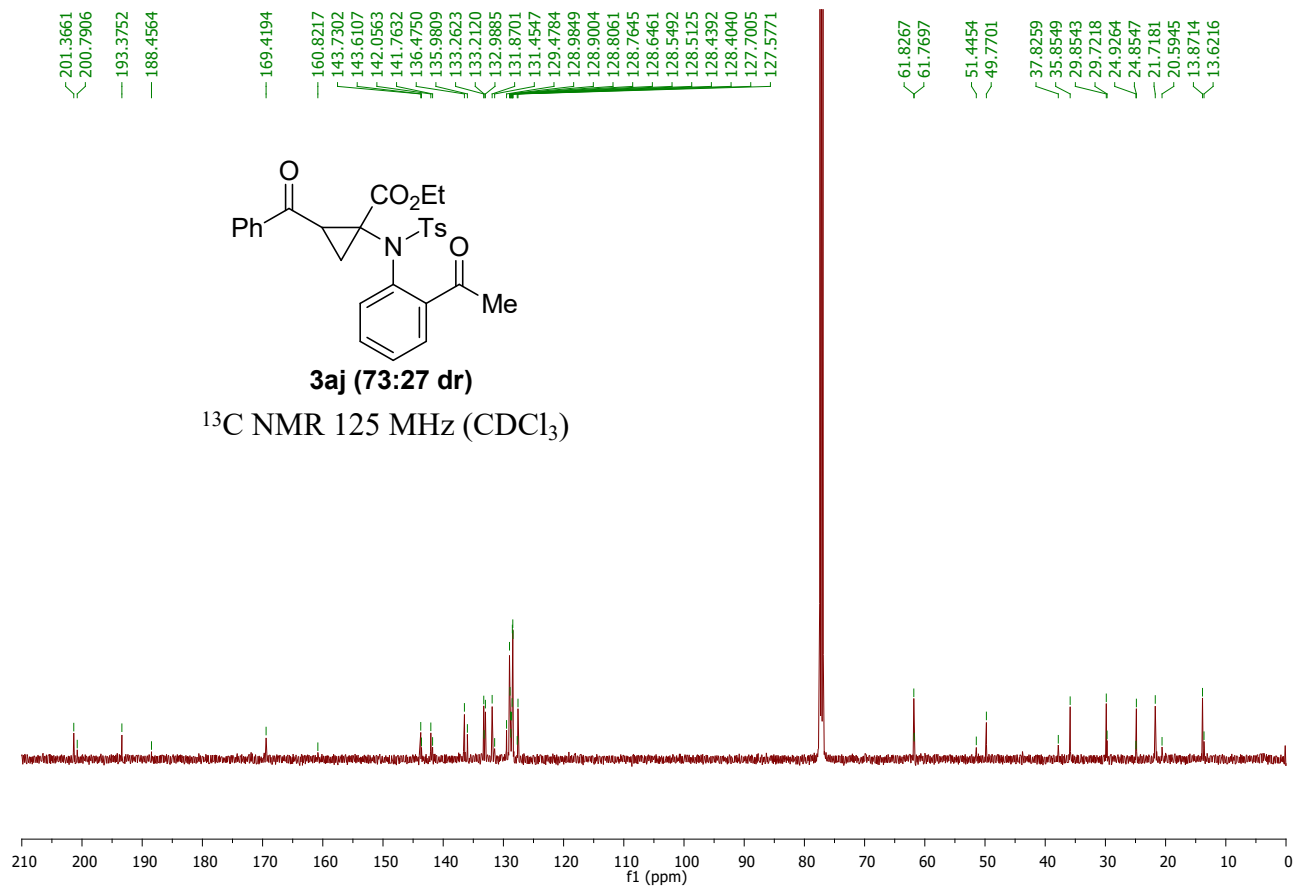

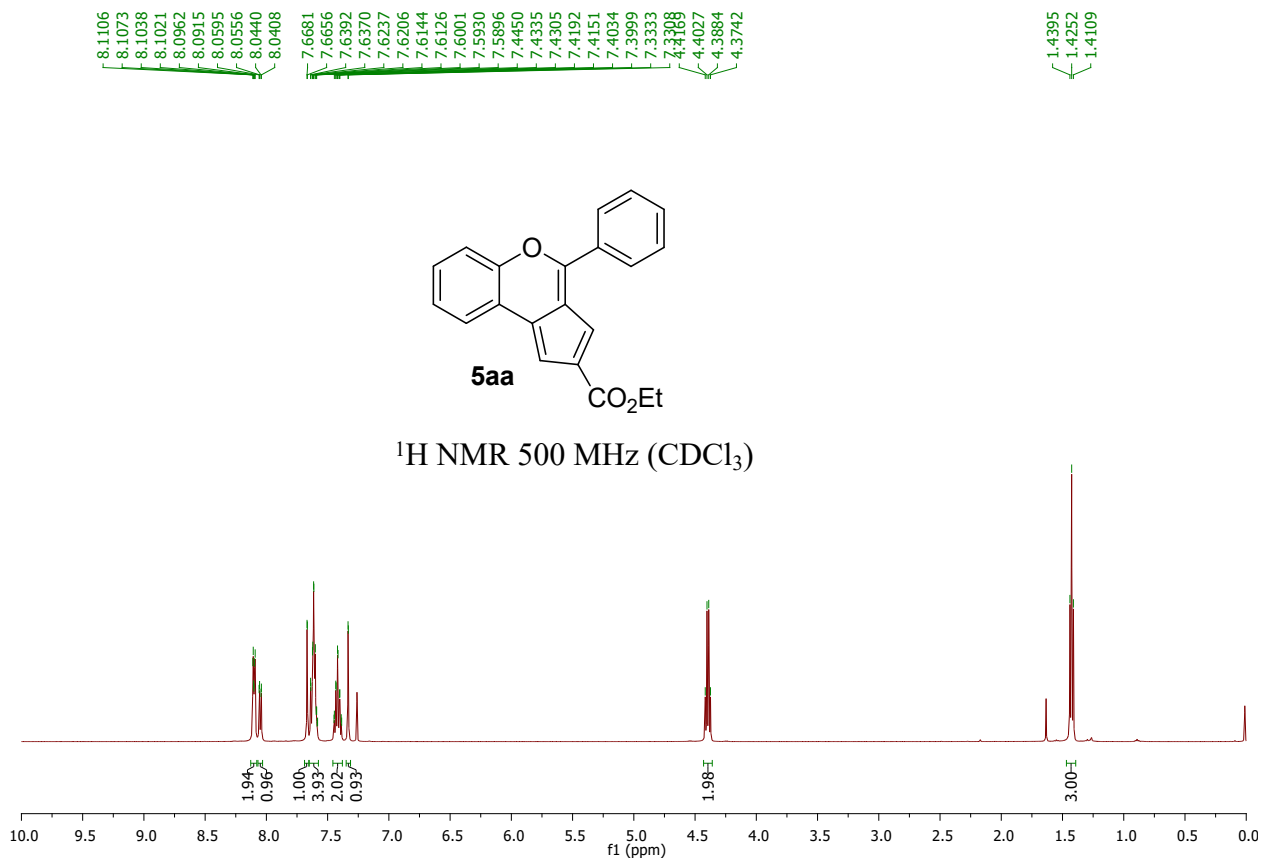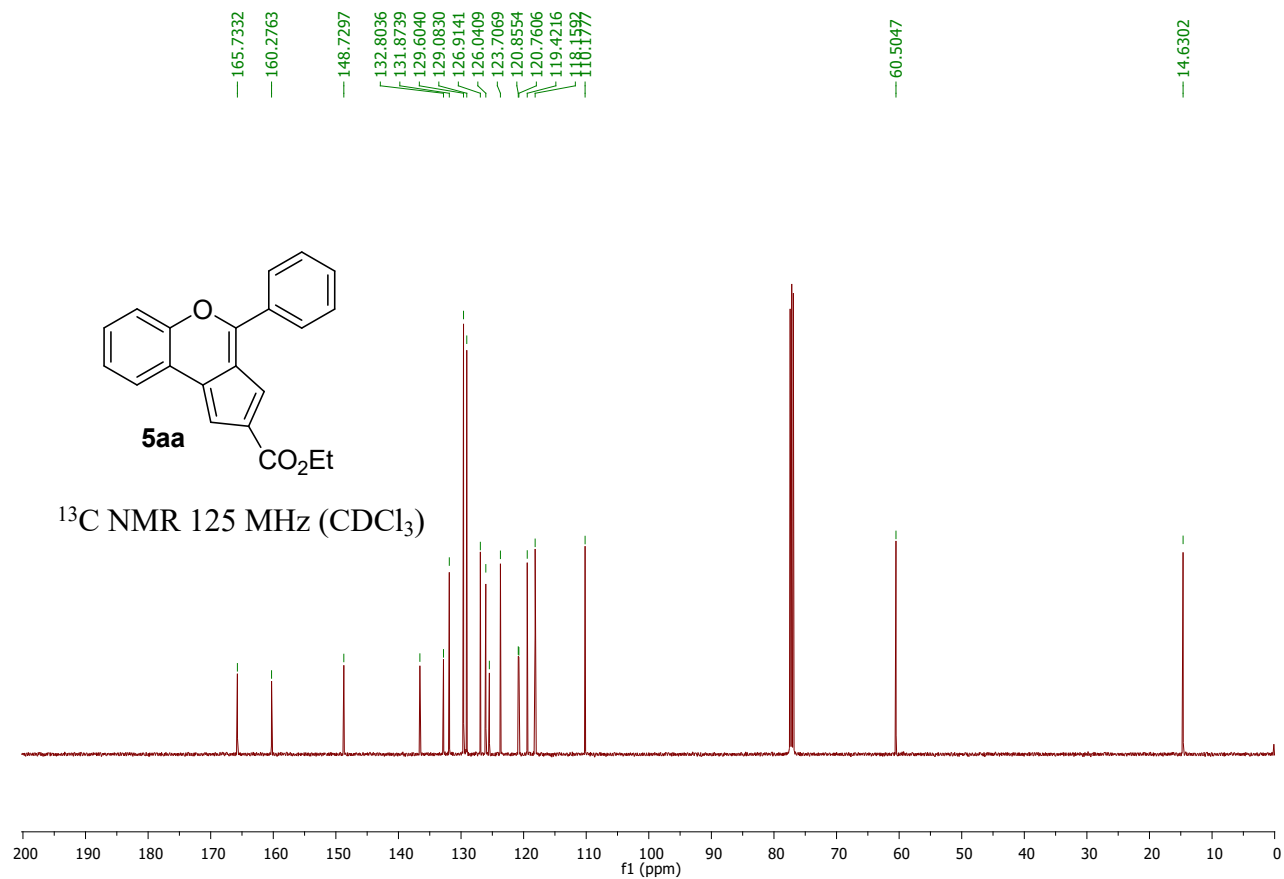

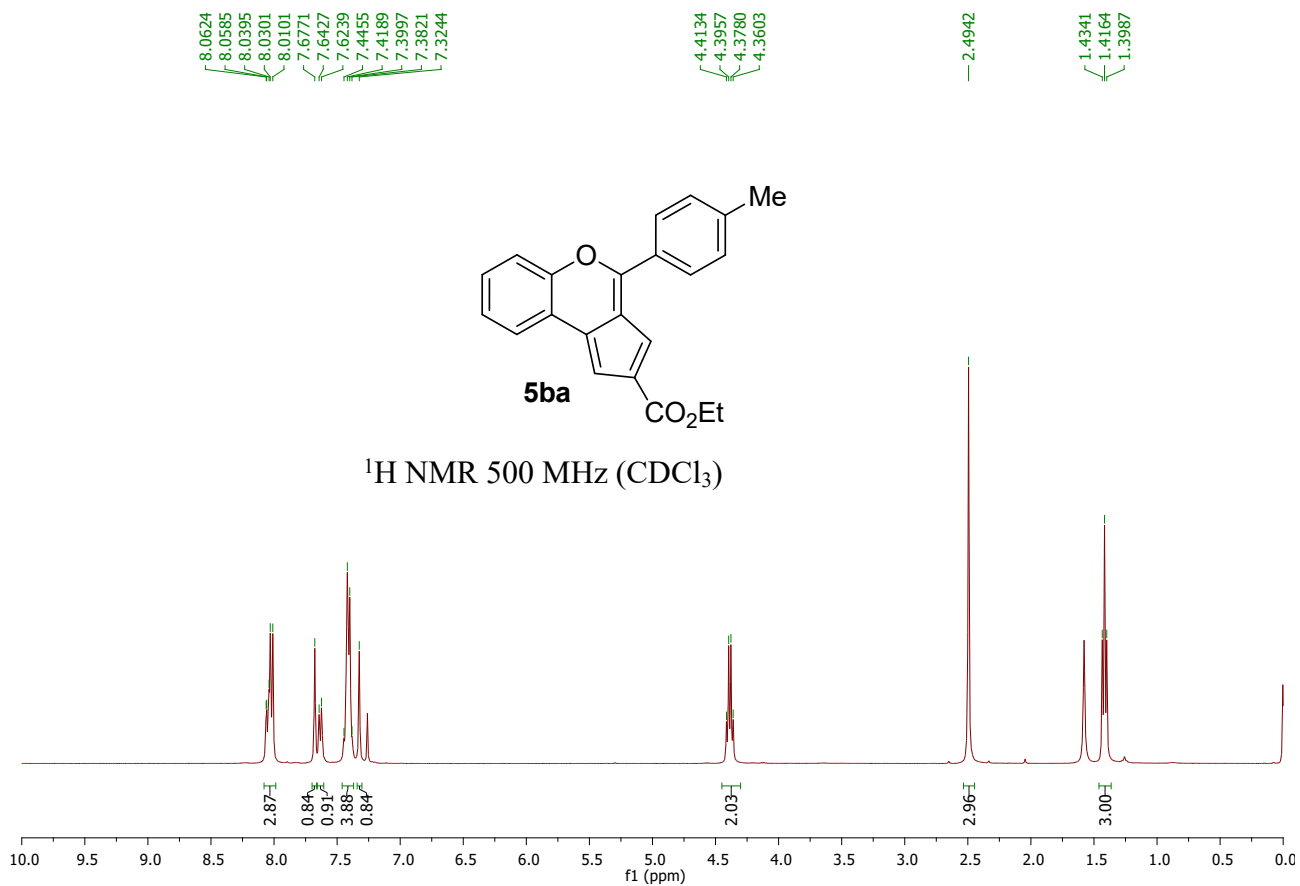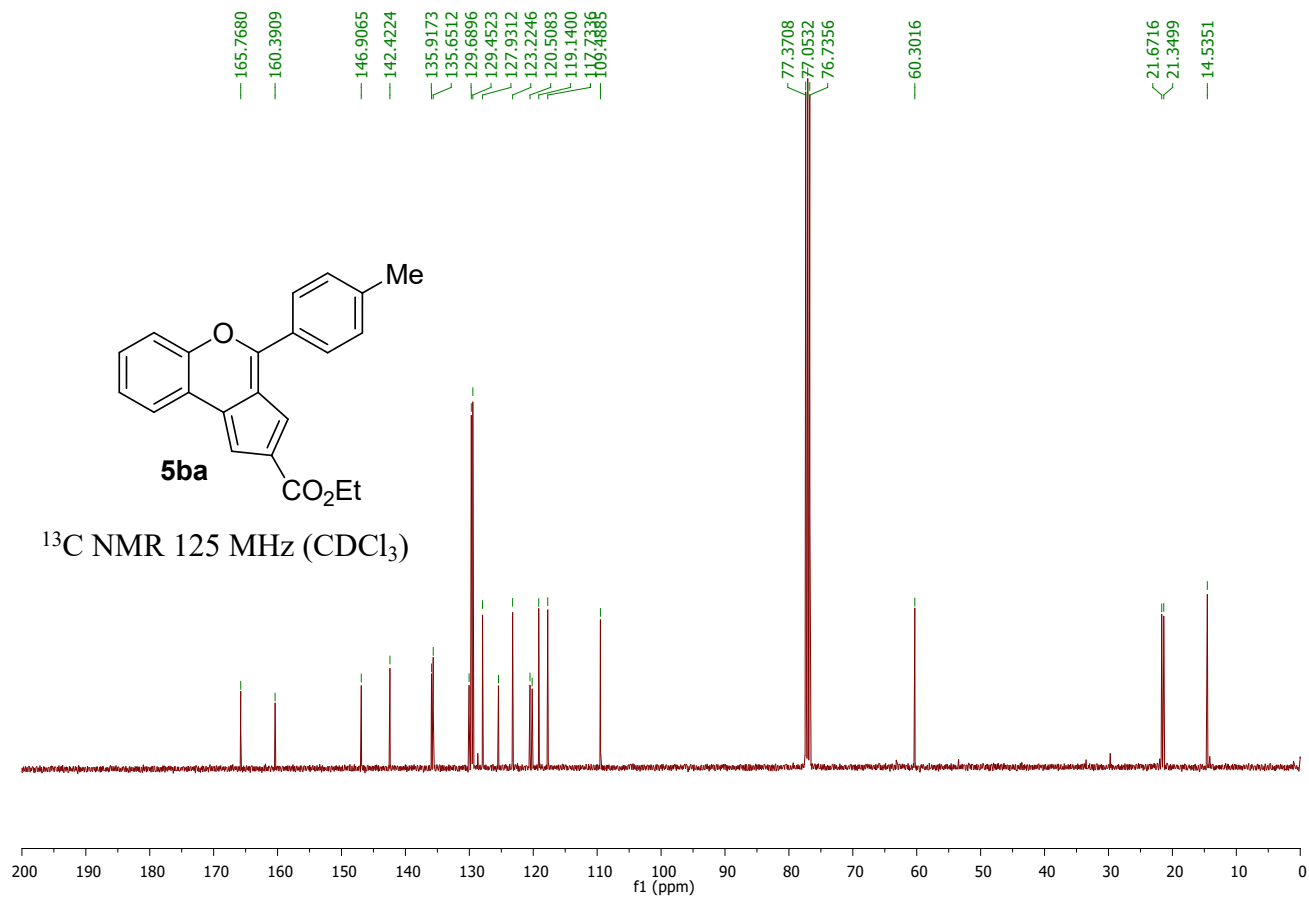

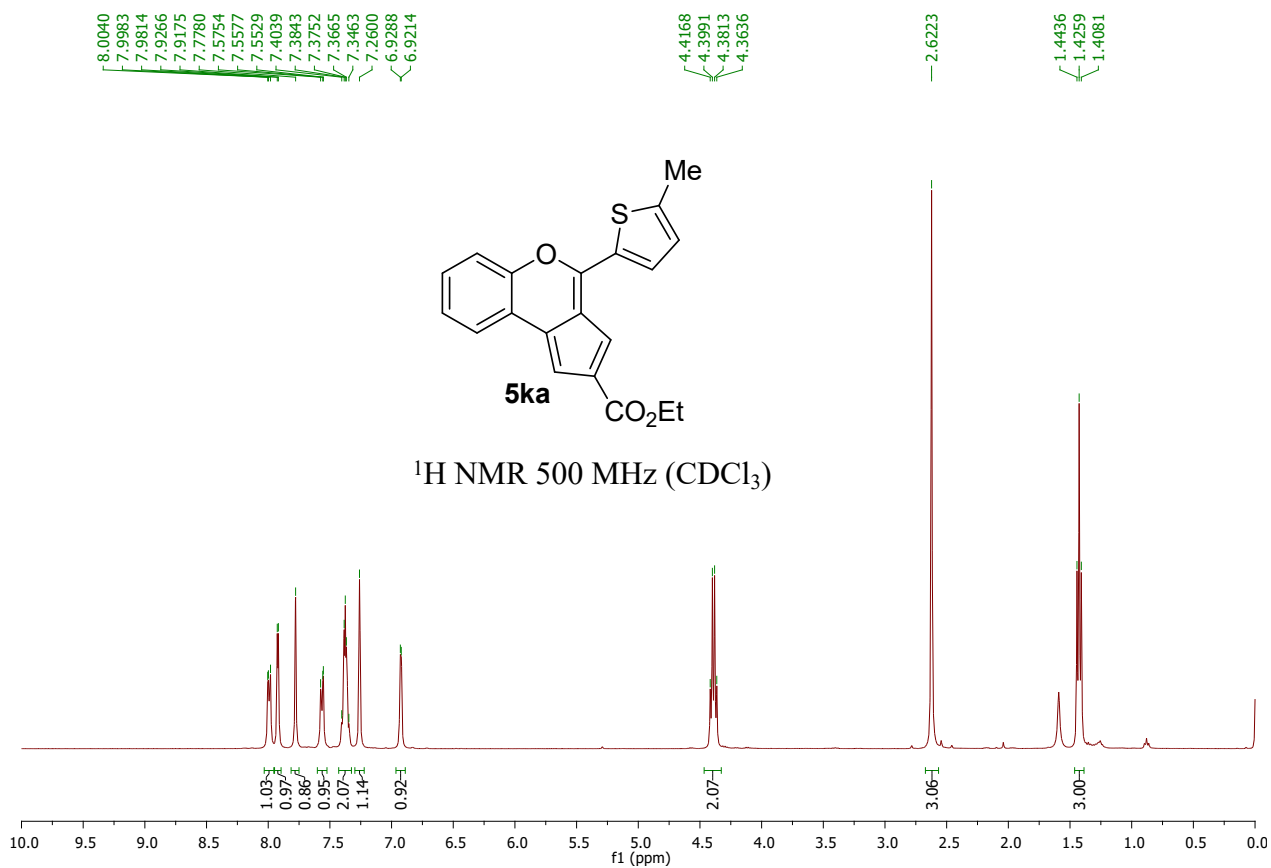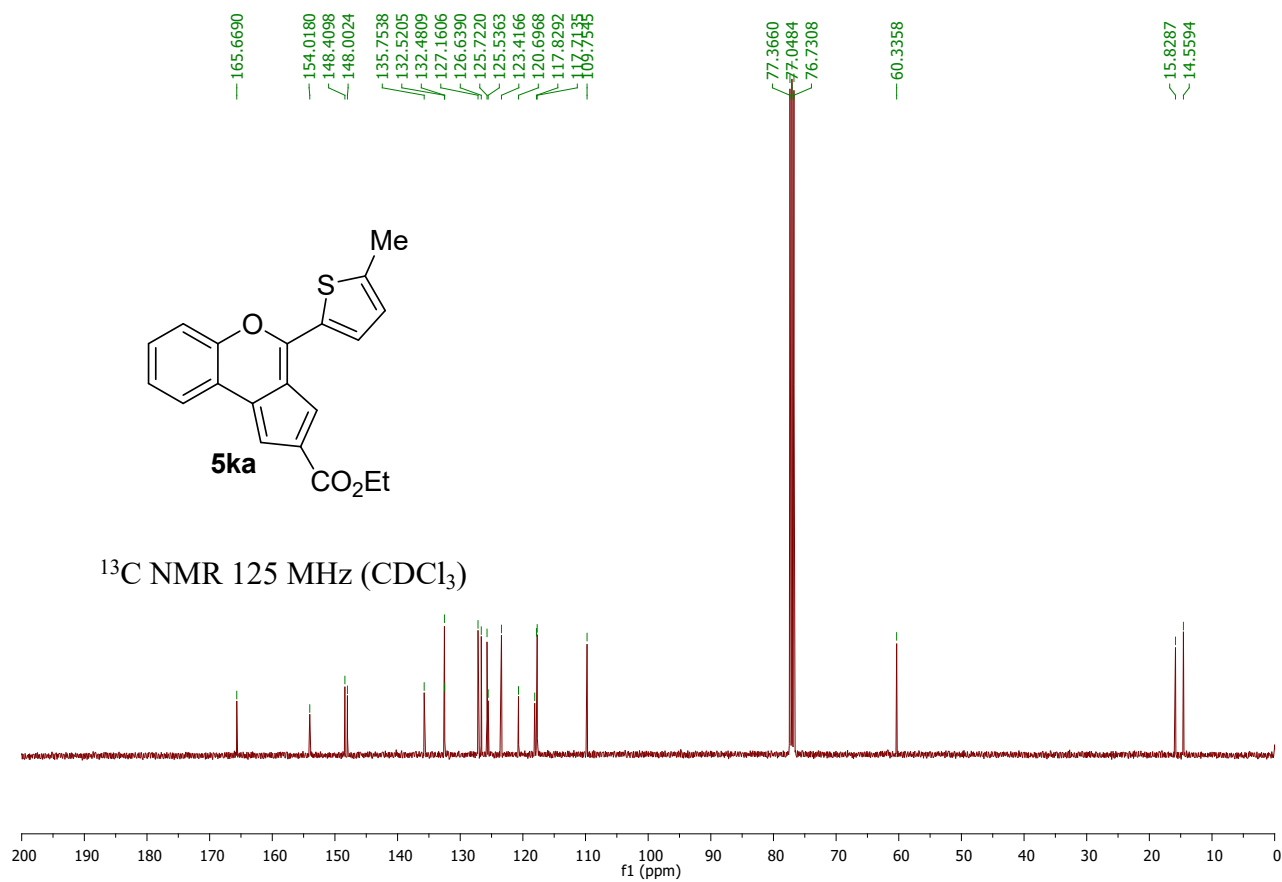

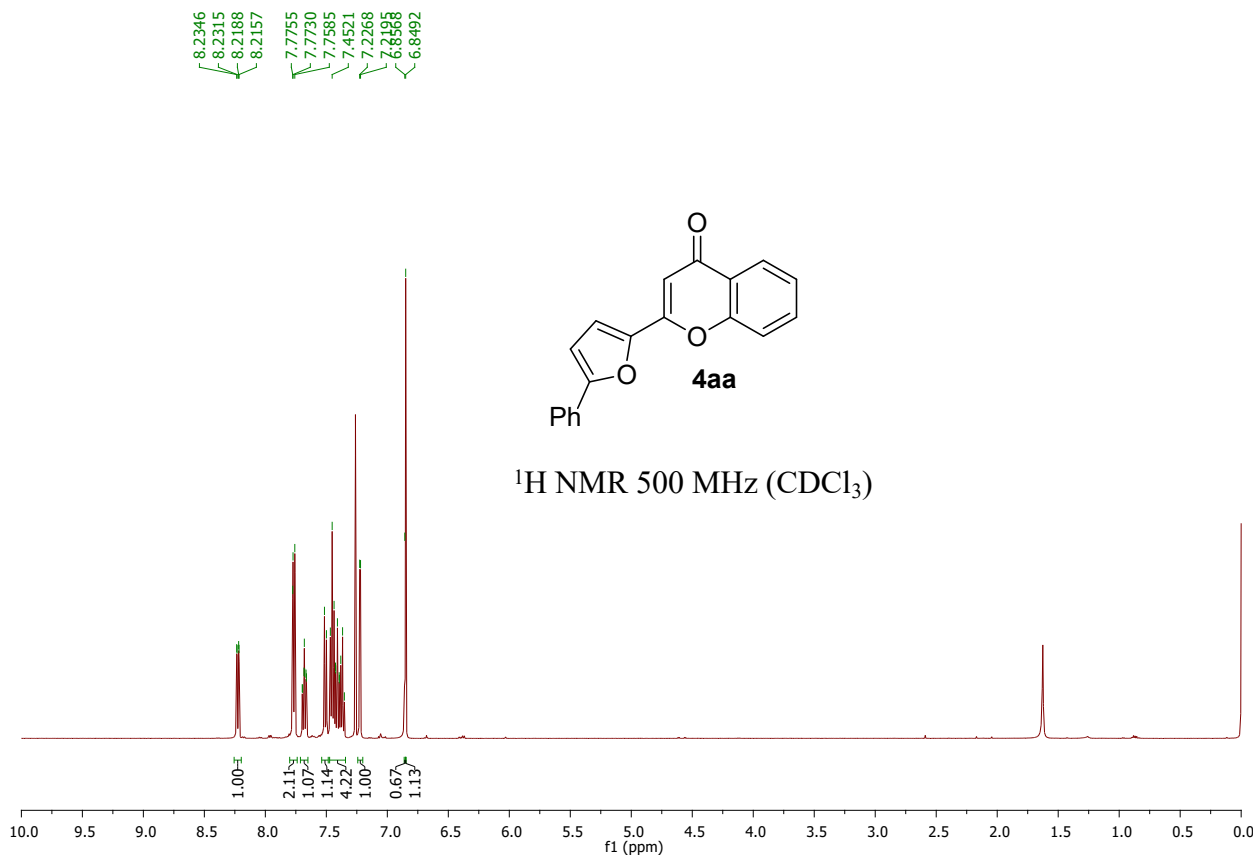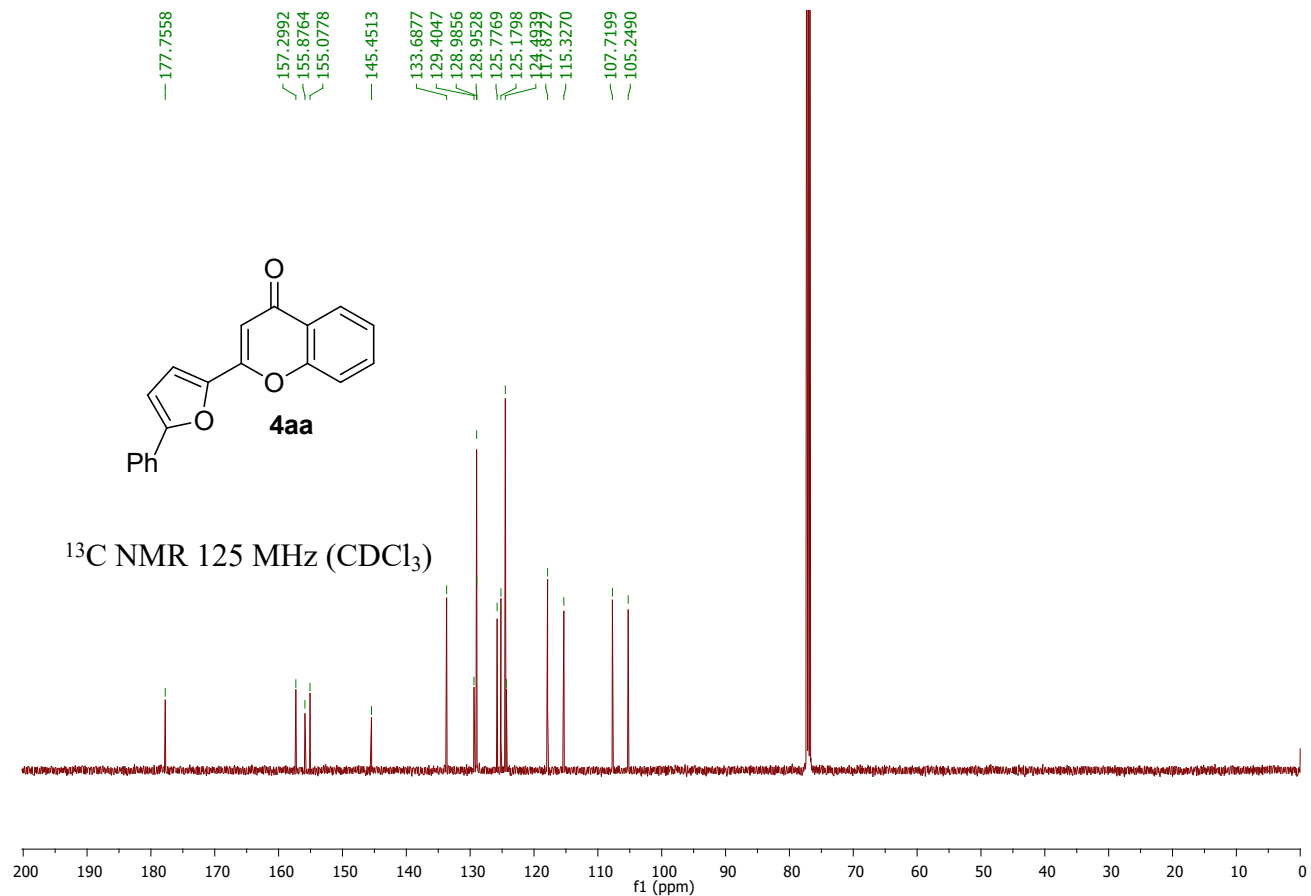

8.4536  
8.4368  
7.9291  
7.9267  
7.9147  
7.9103  
7.8412  
7.8395  
7.8268  
7.6917  
7.5697  
7.5621  
7.5547  
7.5391  
7.5235  
7.4176  
7.3310  
6.9480  
6.9425  
6.8826

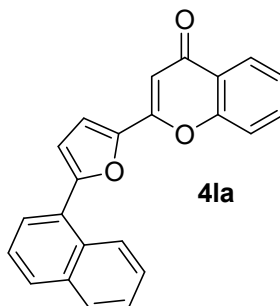

$^1\text{H NMR}$  500 MHz ( $\text{CDCl}_3$ )

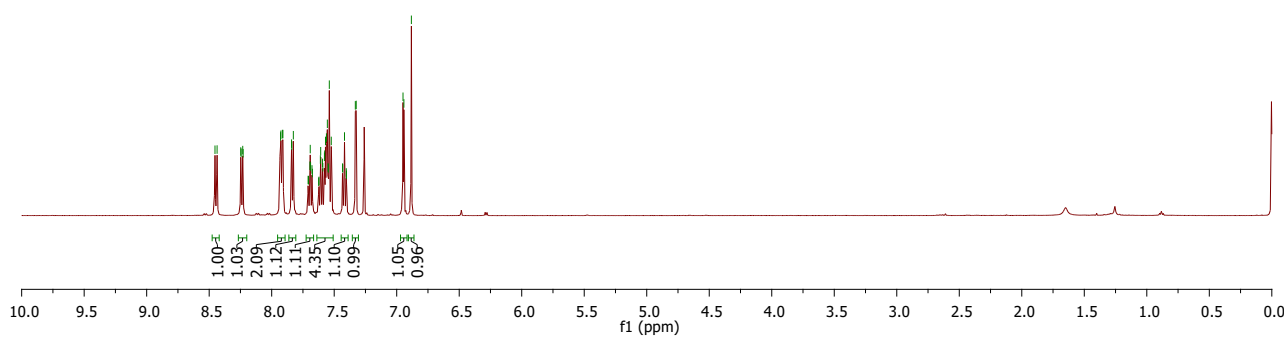

177.8074  
157.2033  
155.9023  
155.1575  
145.9390  
133.7235  
129.9739  
127.3065  
126.9564  
126.3124  
125.8016  
125.6888  
117.9888  
114.9923  
111.8761  
105.3612

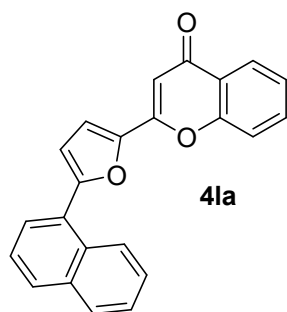

$^{13}\text{C NMR}$  125 MHz ( $\text{CDCl}_3$ )

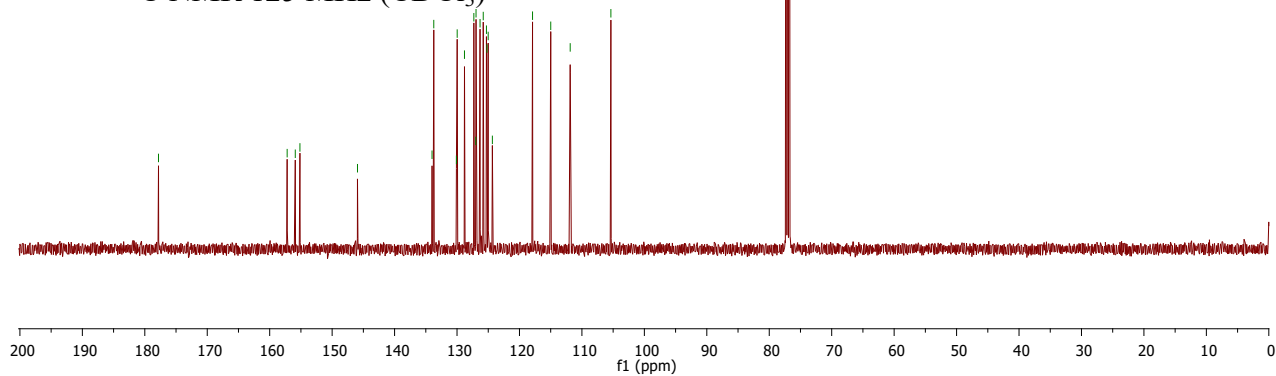

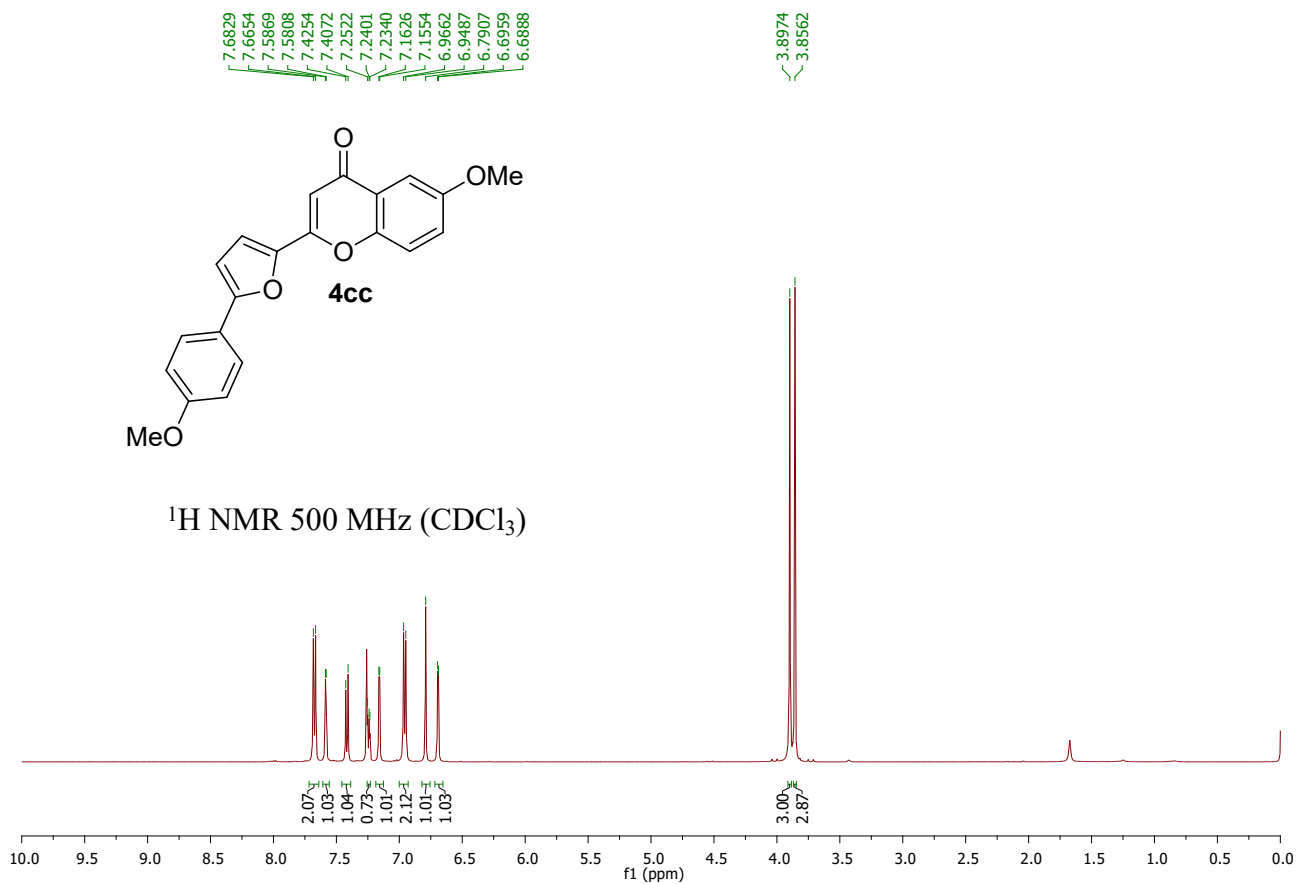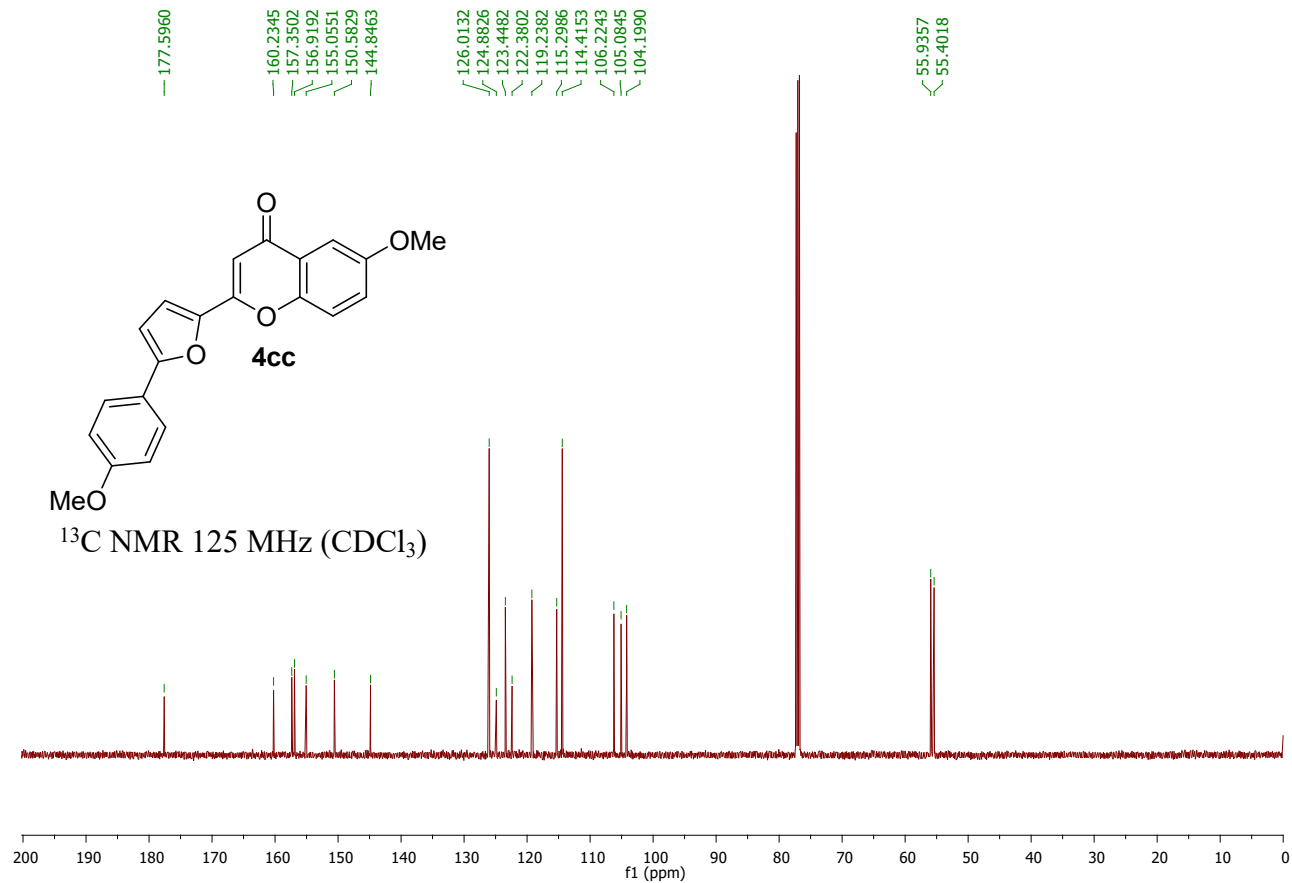



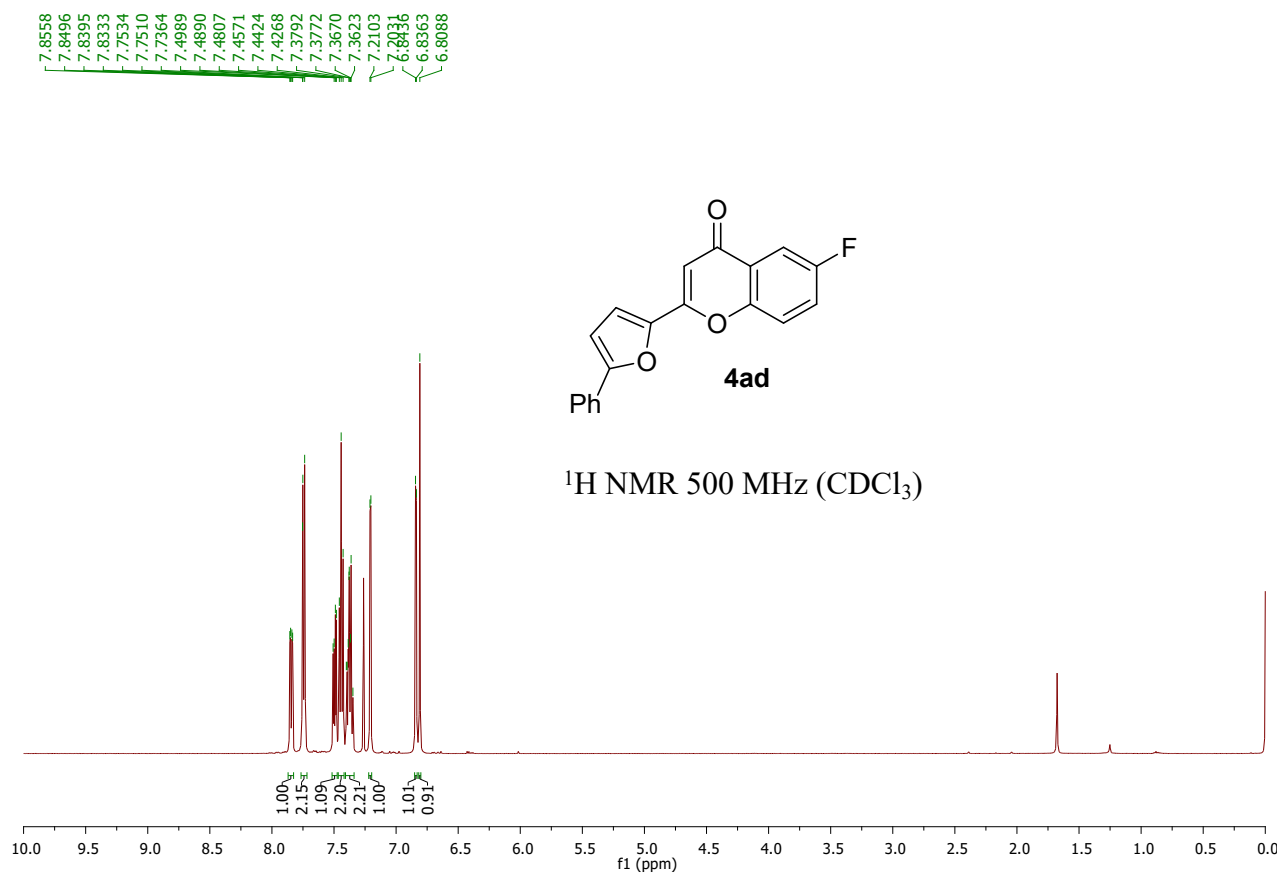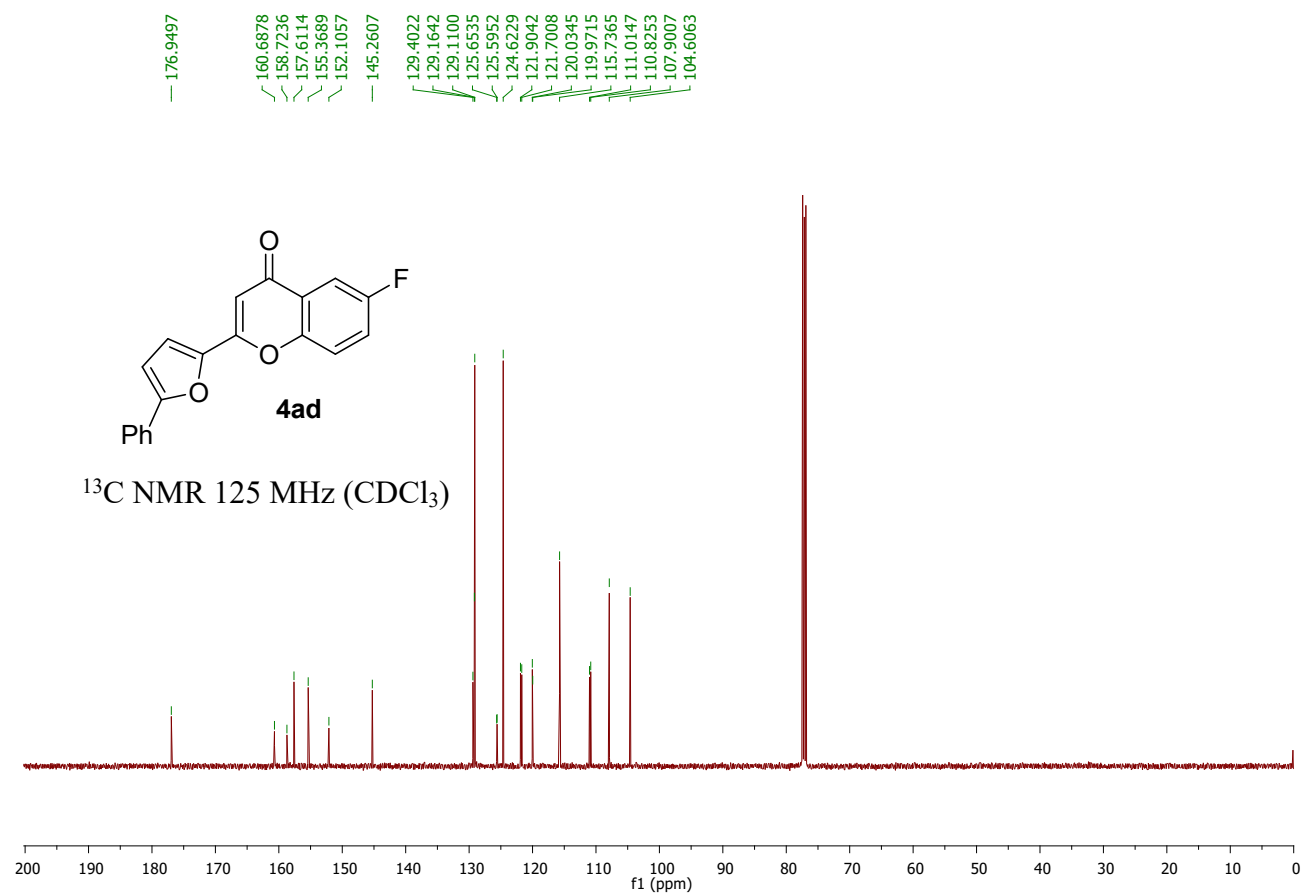

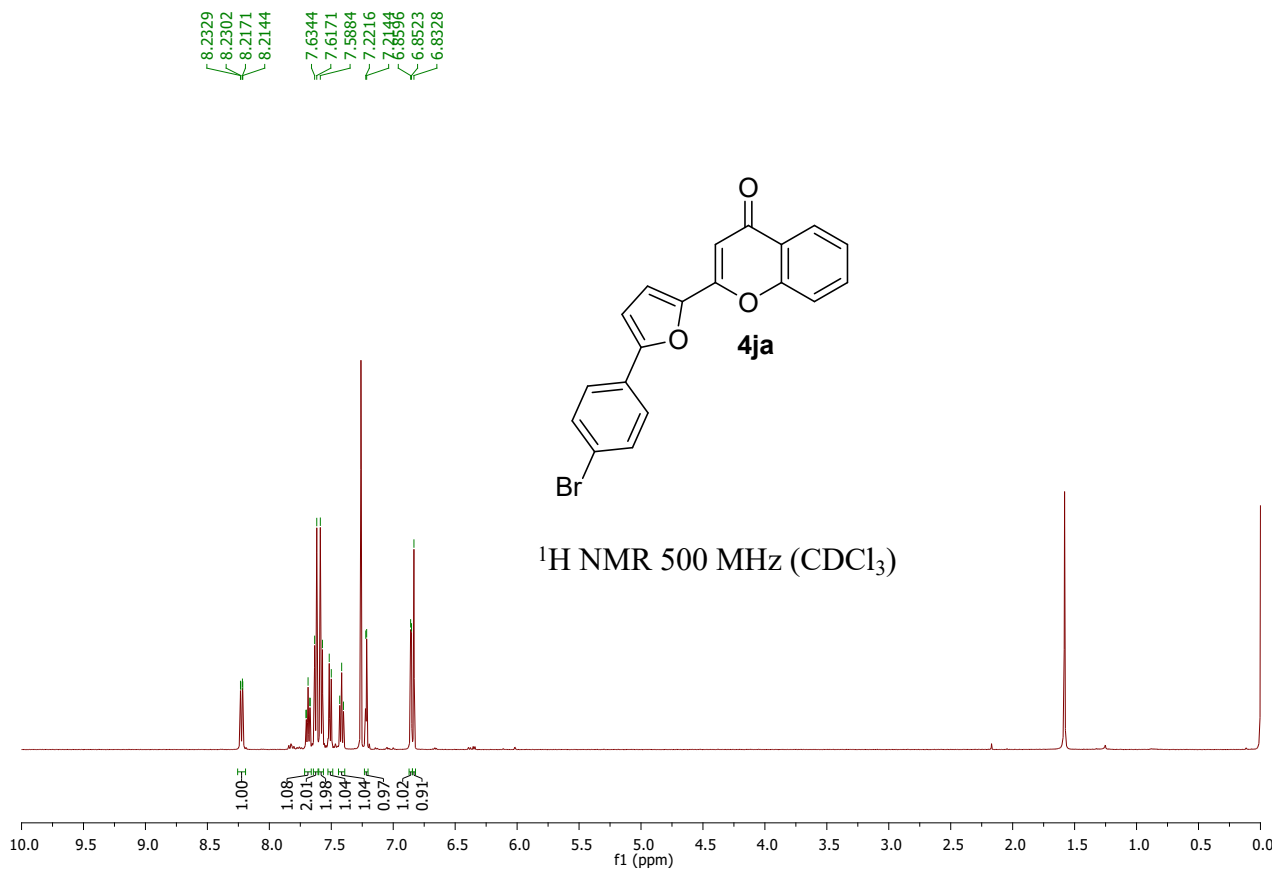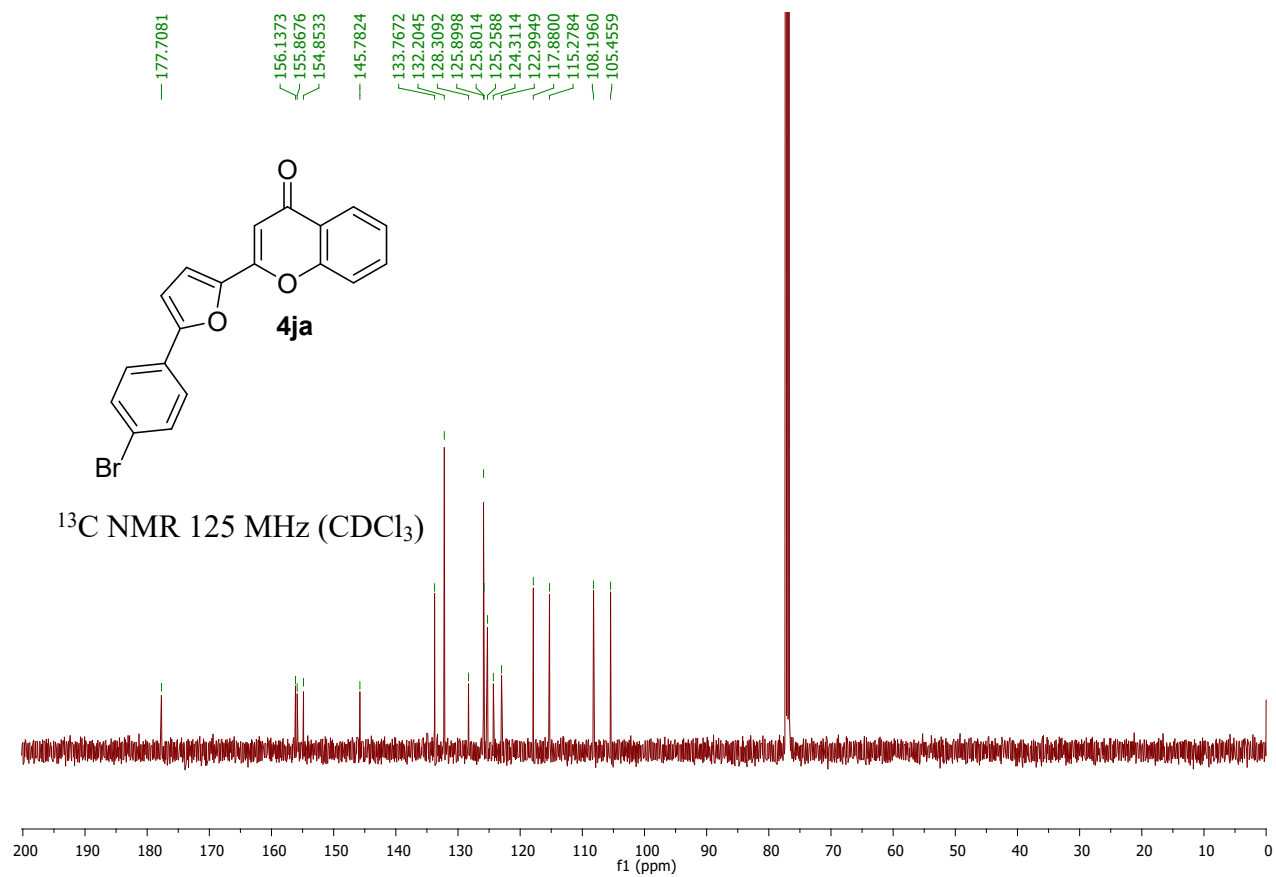

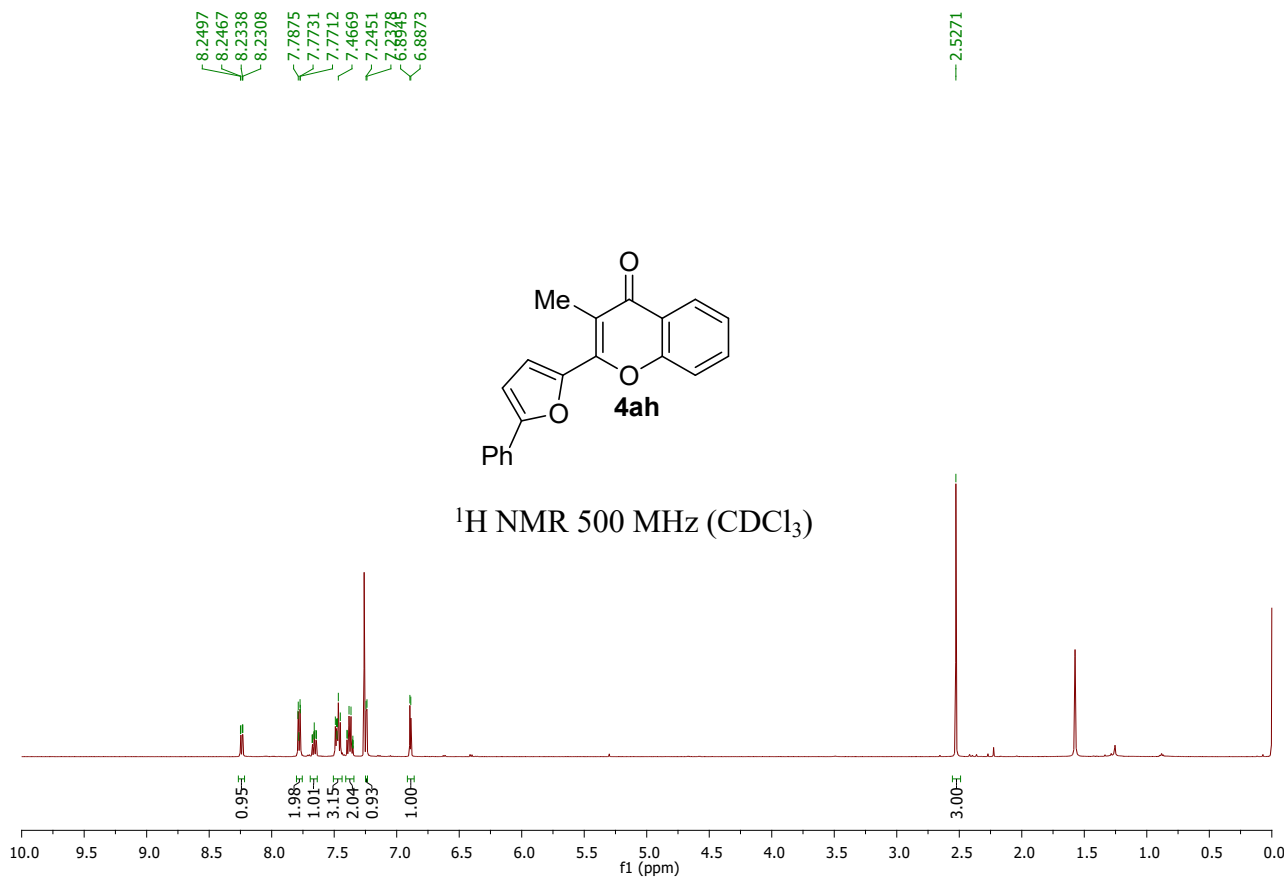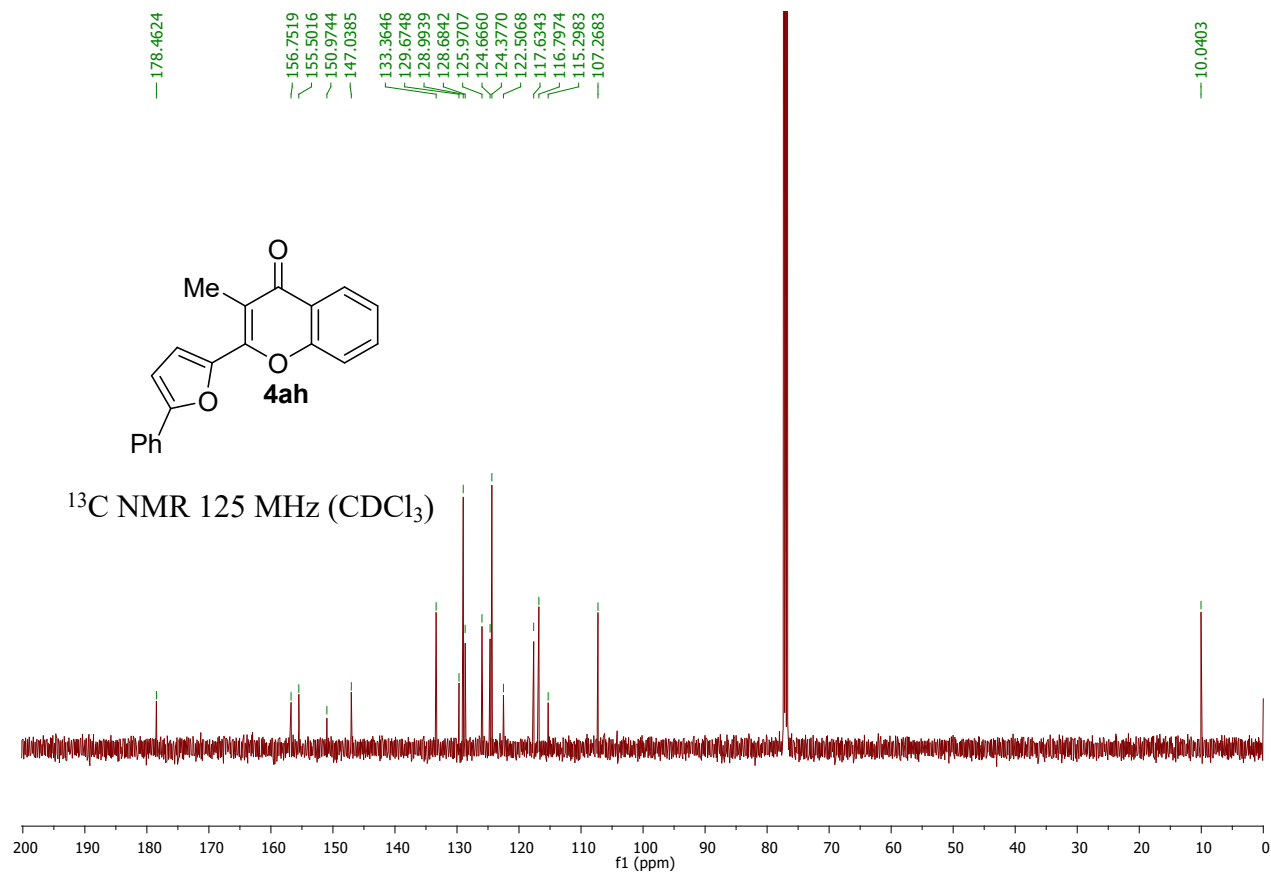

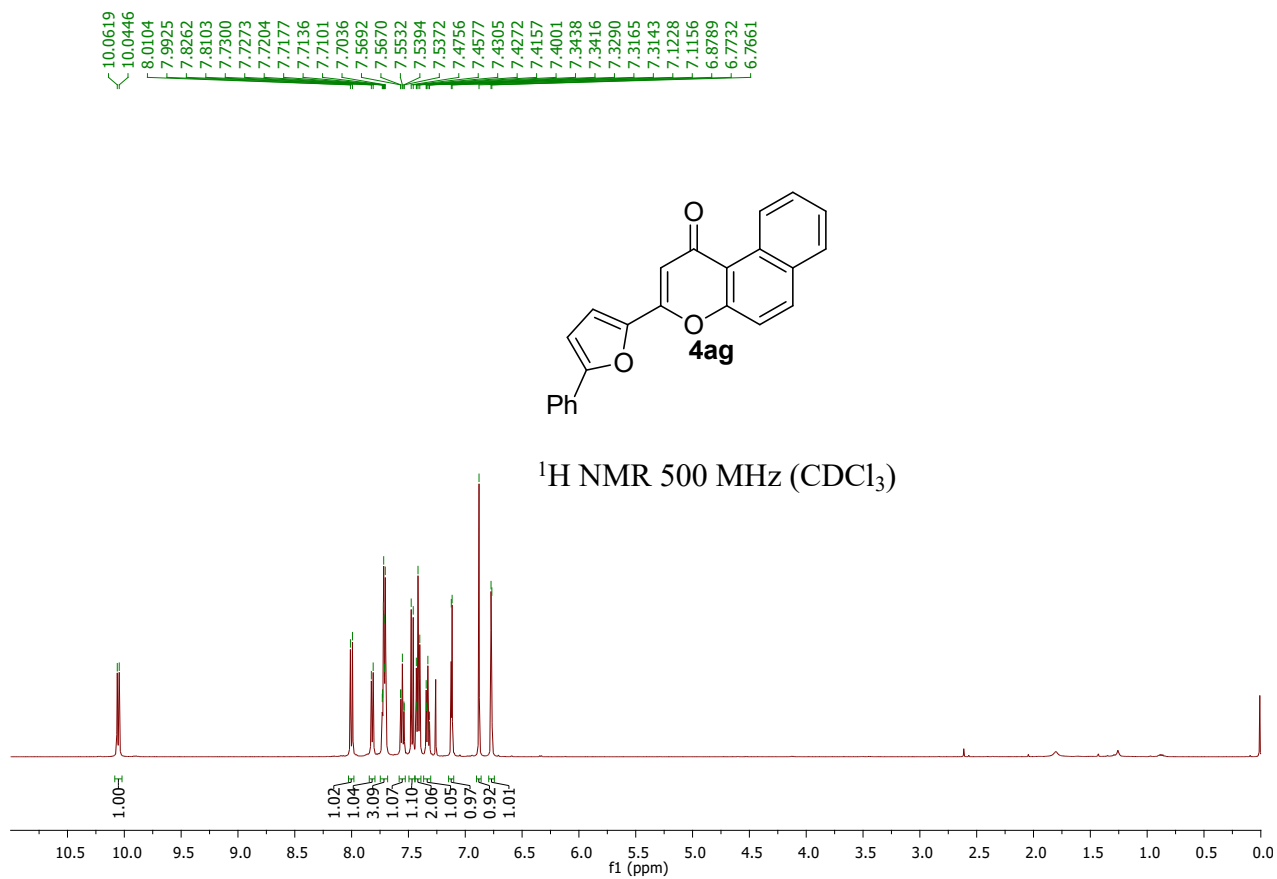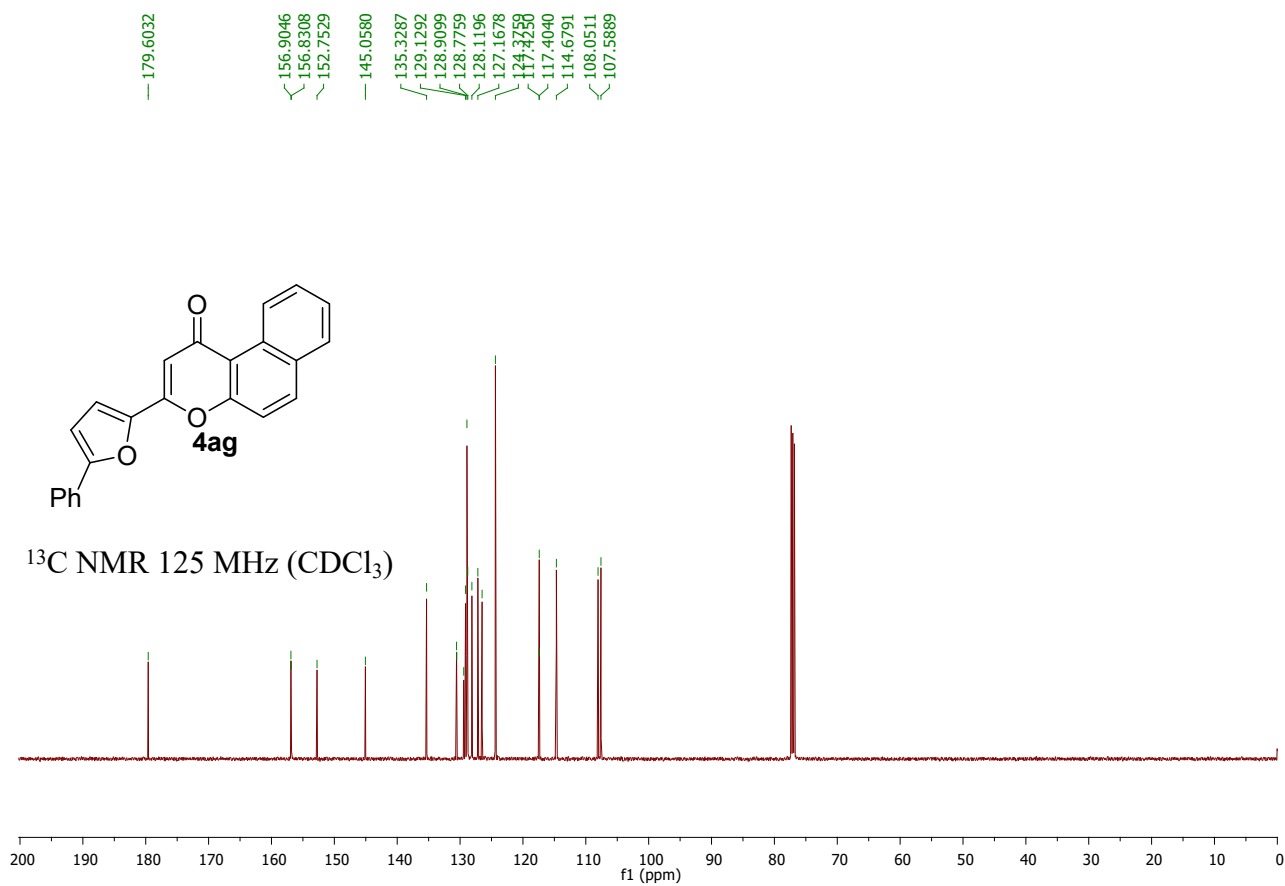

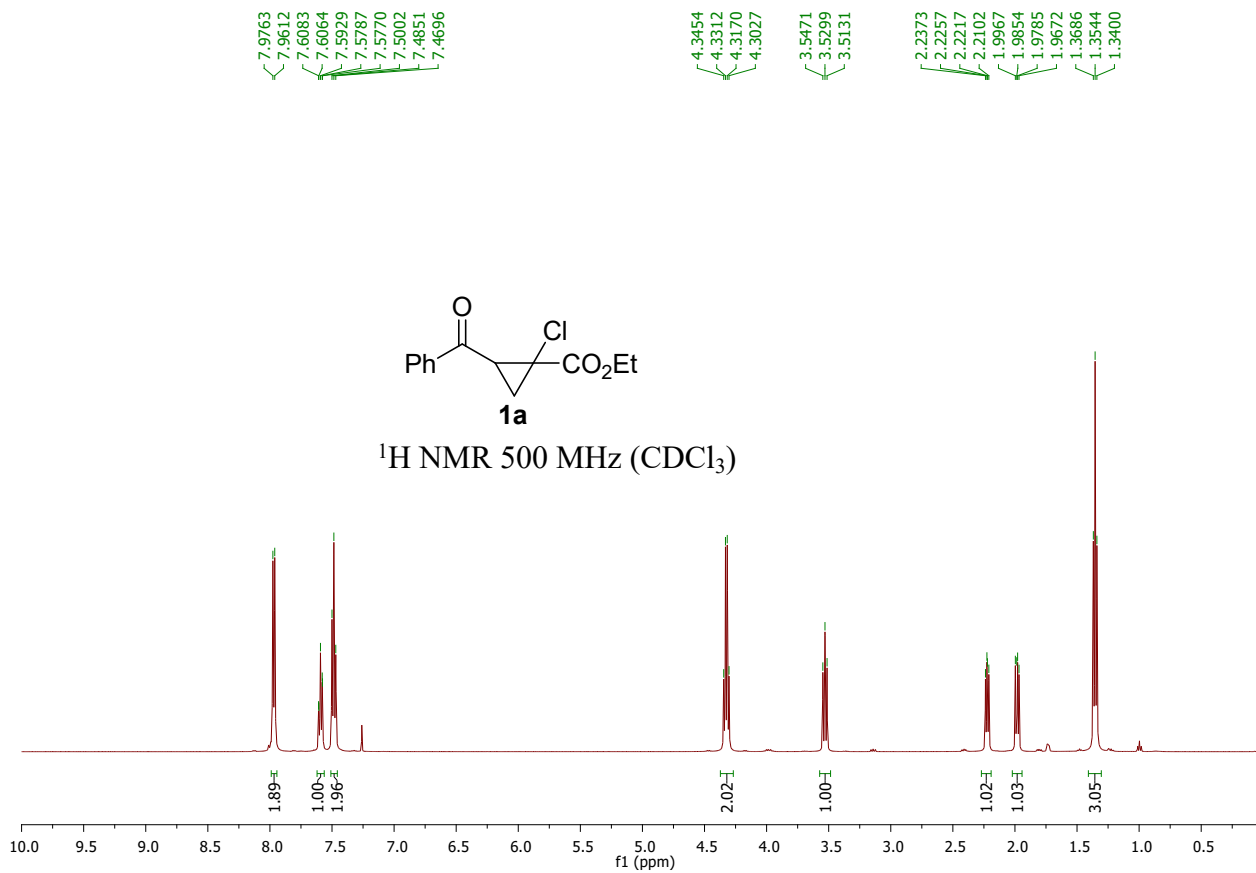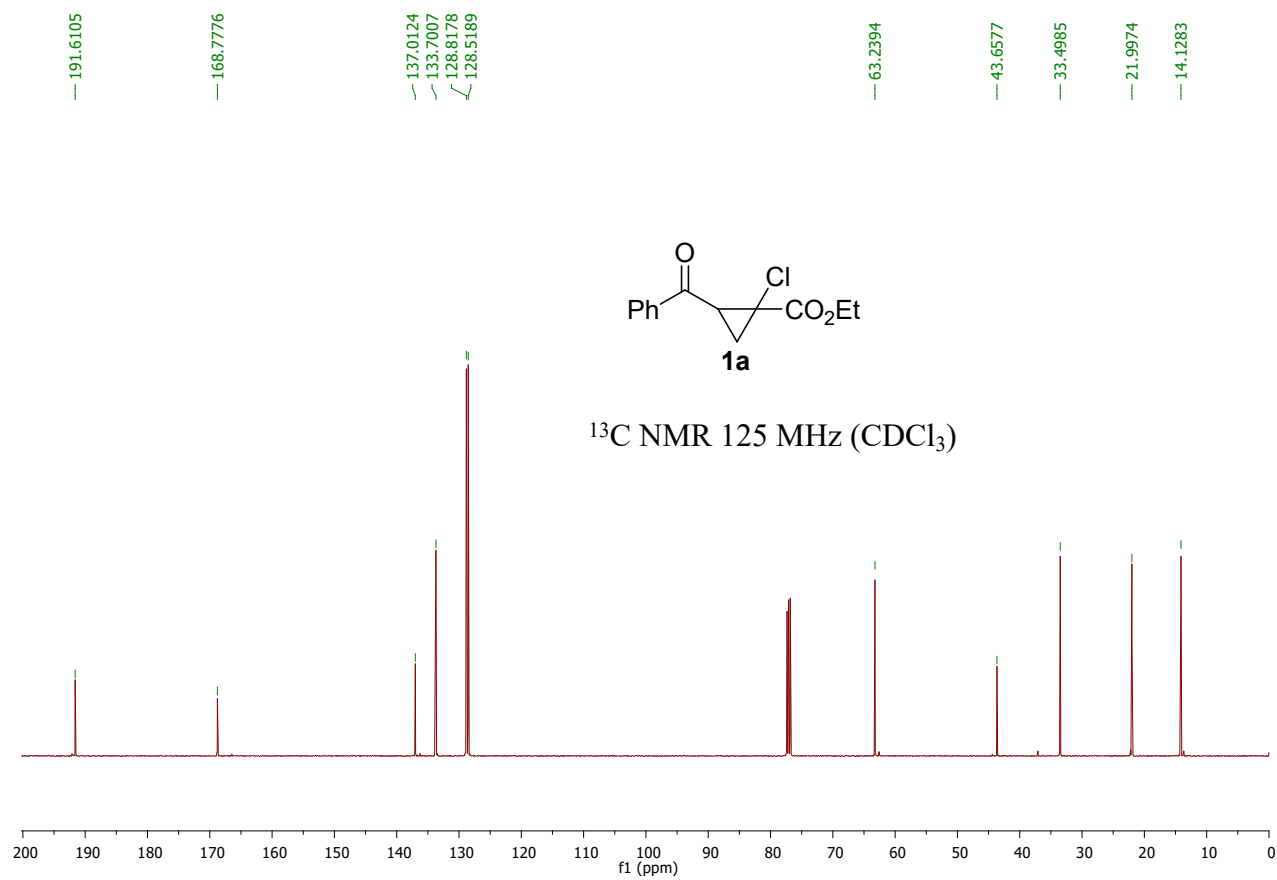

7.8884  
7.8665

6.5597  
6.5422  
6.4544

4.3346  
4.3163  
4.3055  
4.2986  
4.2880  
4.2706  
3.8572  
3.8159  
3.5869  
3.5655  
3.5440

2.2321  
2.2179  
2.2118  
2.1975  
1.9561  
1.9419  
1.9342  
1.9201  
1.3703  
1.3526  
1.3349

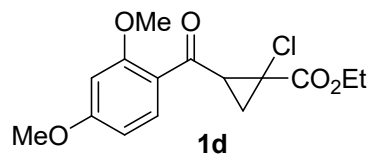

<sup>1</sup>H NMR 500 MHz (CDCl<sub>3</sub>)

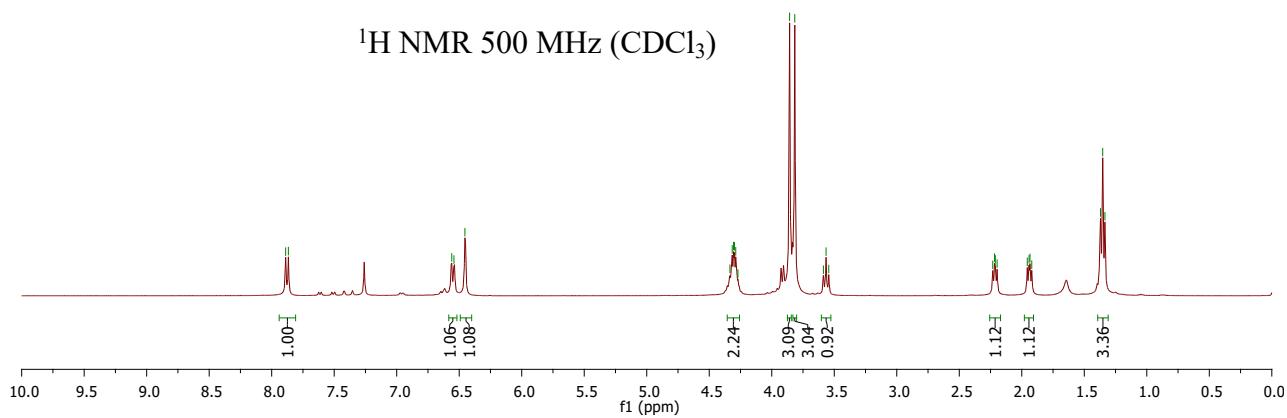

190.3900

169.7061  
165.3559  
161.7001

133.3621

120.7879

105.7583

98.5715

62.8232

55.8675  
55.7290

43.8098  
39.2415

22.5111

14.3687

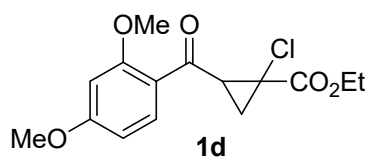

<sup>13</sup>C NMR 125 MHz (CDCl<sub>3</sub>)

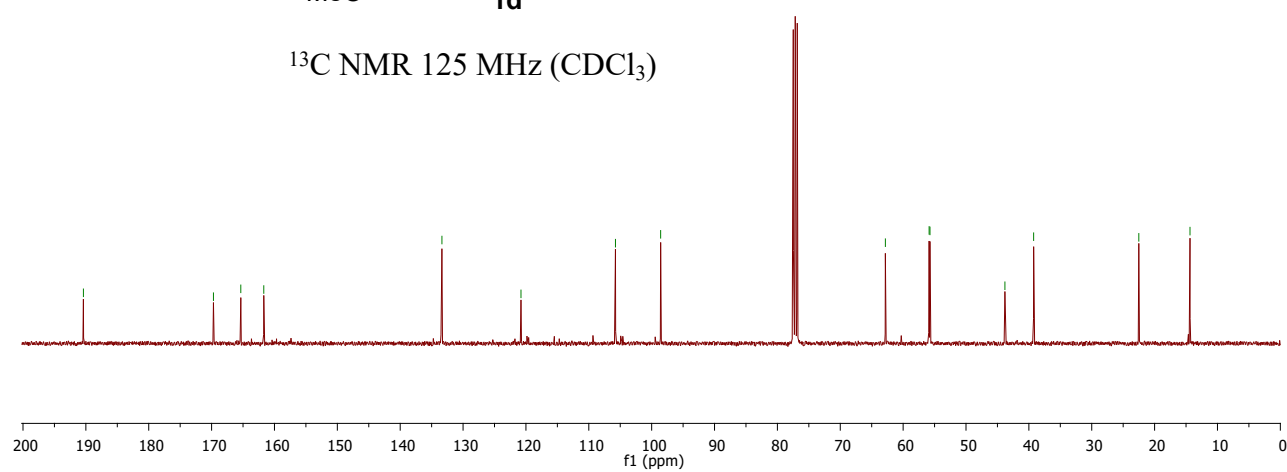

8.7264  
8.7092  
8.0405  
8.0240  
7.9731  
7.9720  
7.9588  
7.8893  
7.8831  
7.6355  
7.6333  
7.6192  
7.6048  
7.6024  
7.5661  
7.5585  
7.5519  
7.5427  
7.5277

4.3566  
4.3423  
4.3281  
4.3138

3.5400  
3.5237  
3.5062

2.3691  
2.3578  
2.3534  
2.3422  
2.0852  
2.0740  
2.0672  
2.0560  
1.3807  
1.3664  
1.3522

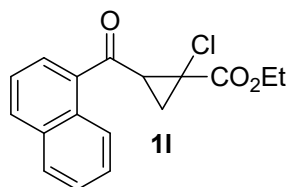

<sup>1</sup>H NMR 500 MHz (CDCl<sub>3</sub>)

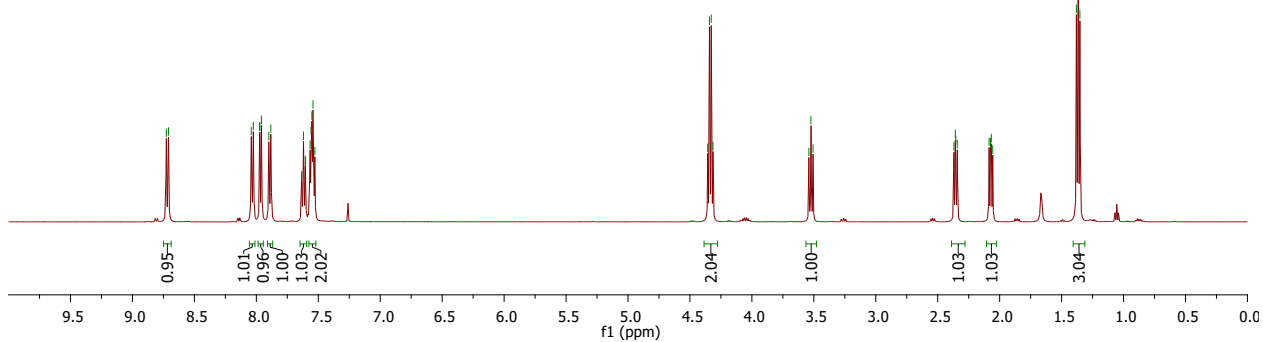

7.8895  
7.8731

7.2973  
7.2811

4.3526  
4.3384  
4.3241  
4.3098

3.5346  
3.5185  
3.5165  
3.5005

2.4196  
2.2304  
2.2192  
2.2146  
2.2034  
1.9899  
1.9786  
1.9716  
1.9604  
1.3772  
1.3629  
1.3486

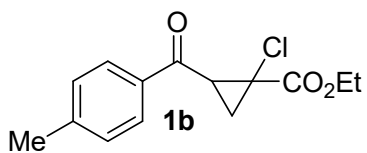

<sup>1</sup>H NMR 500 MHz (CDCl<sub>3</sub>)

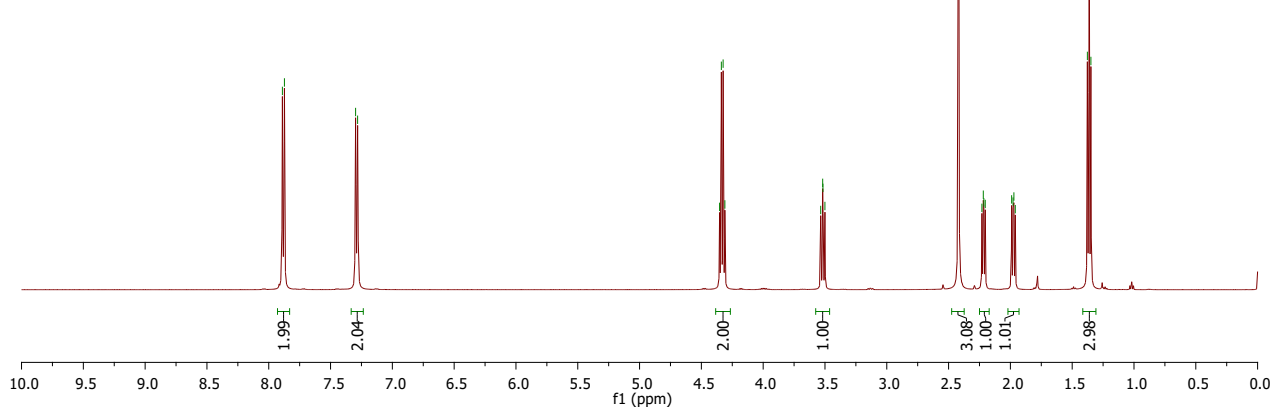

7.6070  
7.5916  
7.4331  
7.4256  
7.3668  
7.3592  
7.3511  
7.3429  
7.3344

4.3031  
4.2889  
4.2746  
4.2604

3.4854  
3.4690  
3.4518

2.2631  
2.2519  
2.2474  
2.2362  
2.0850  
2.0739  
2.0672  
2.0561  
1.3353  
1.3210  
1.3067

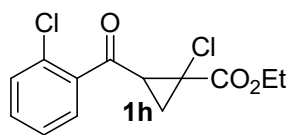

$^1\text{H NMR}$  500 MHz ( $\text{CDCl}_3$ )

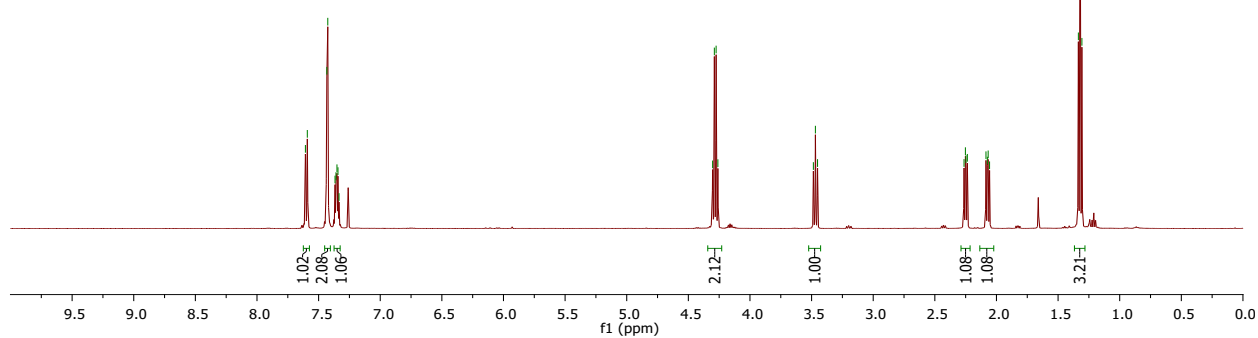

193.4755

168.6119

138.4787  
132.8867  
132.2345  
130.8752  
130.4149  
127.2781

63.2486

45.7457

37.4100

23.6104

14.2196

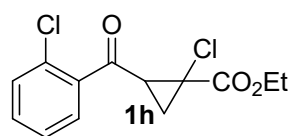

$^{13}\text{C NMR}$  125 MHz ( $\text{CDCl}_3$ )

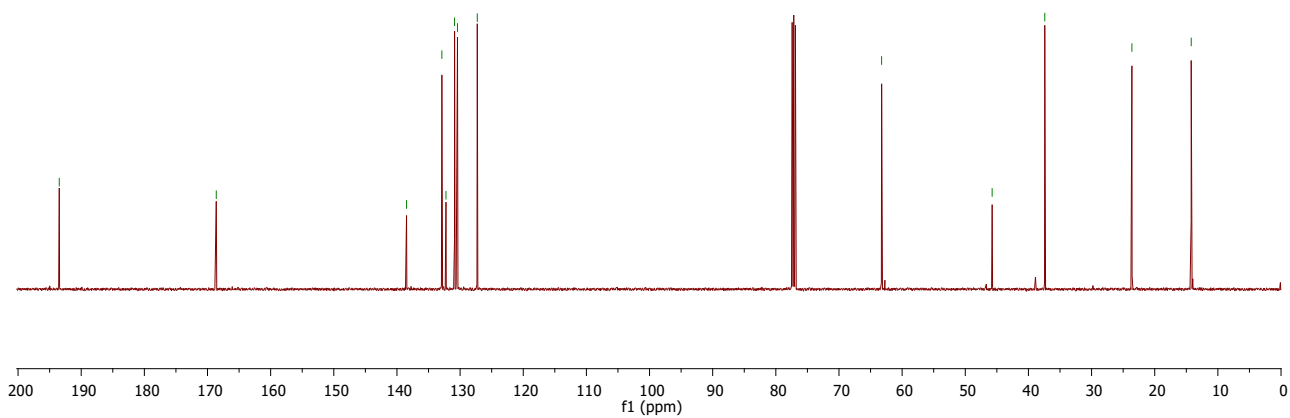



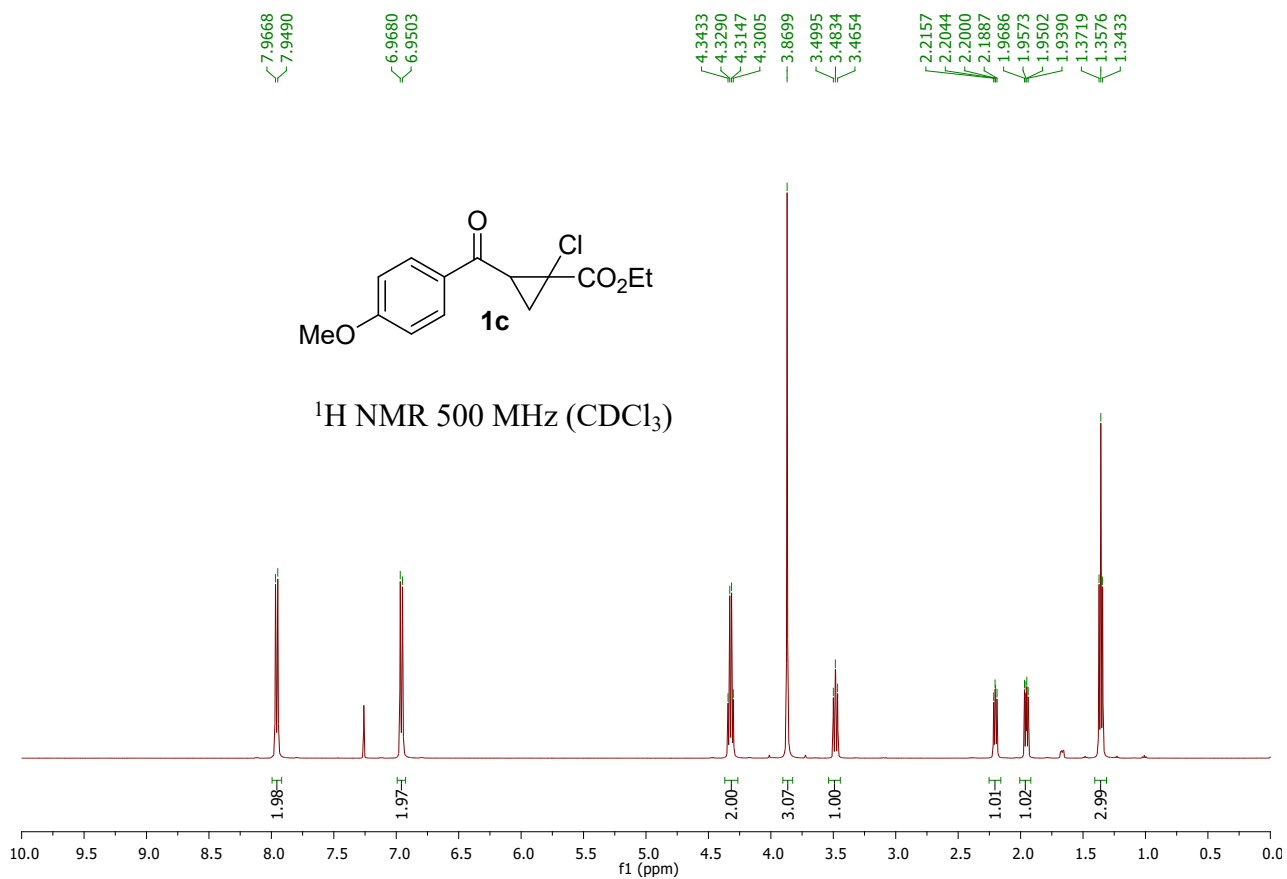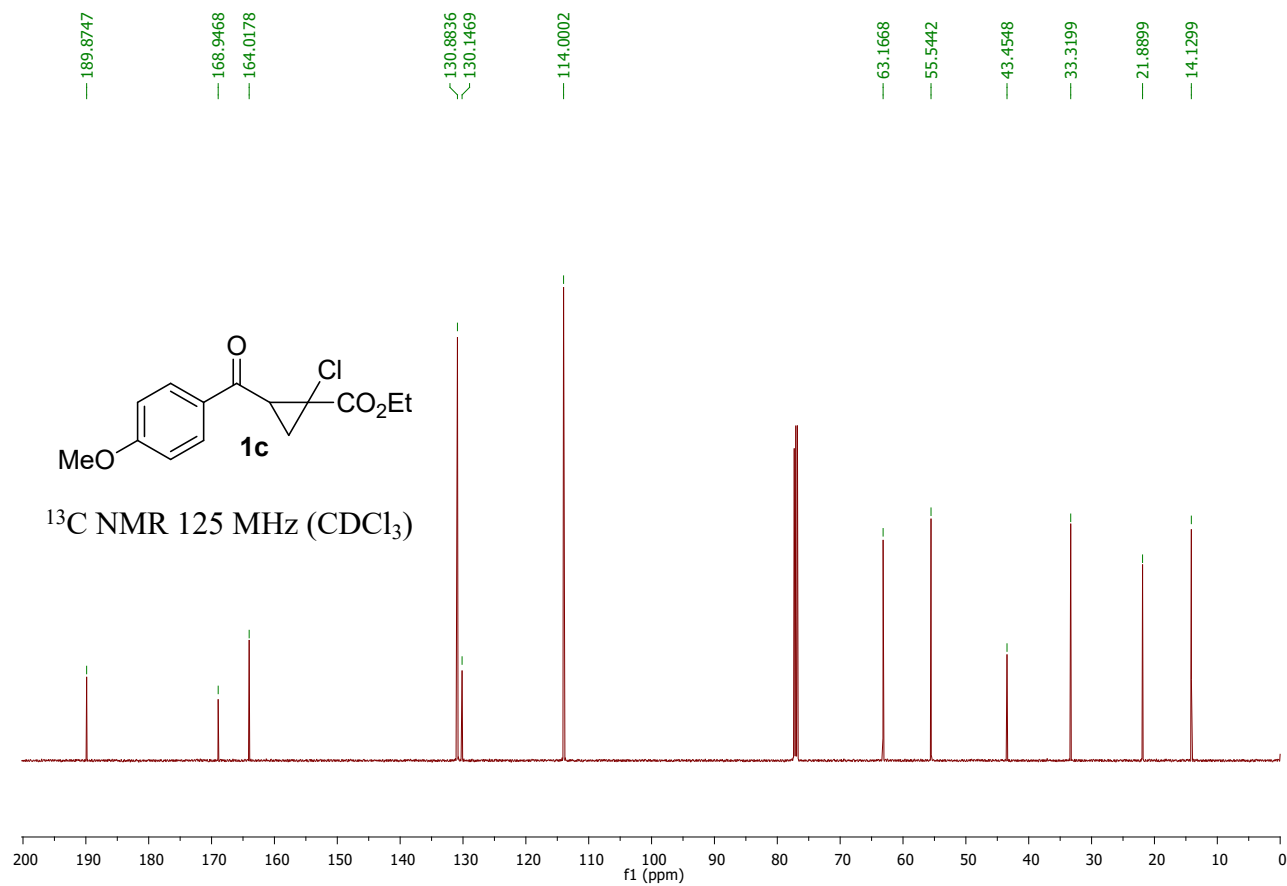

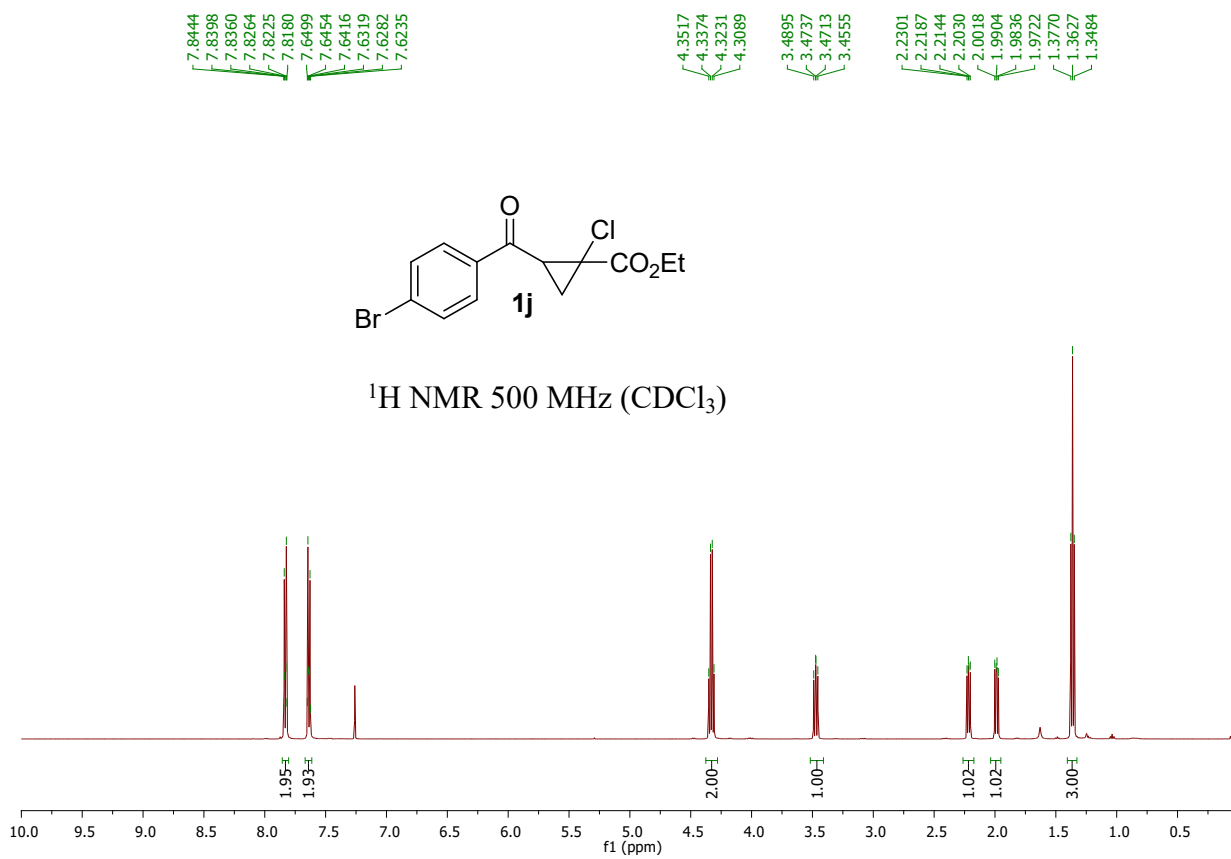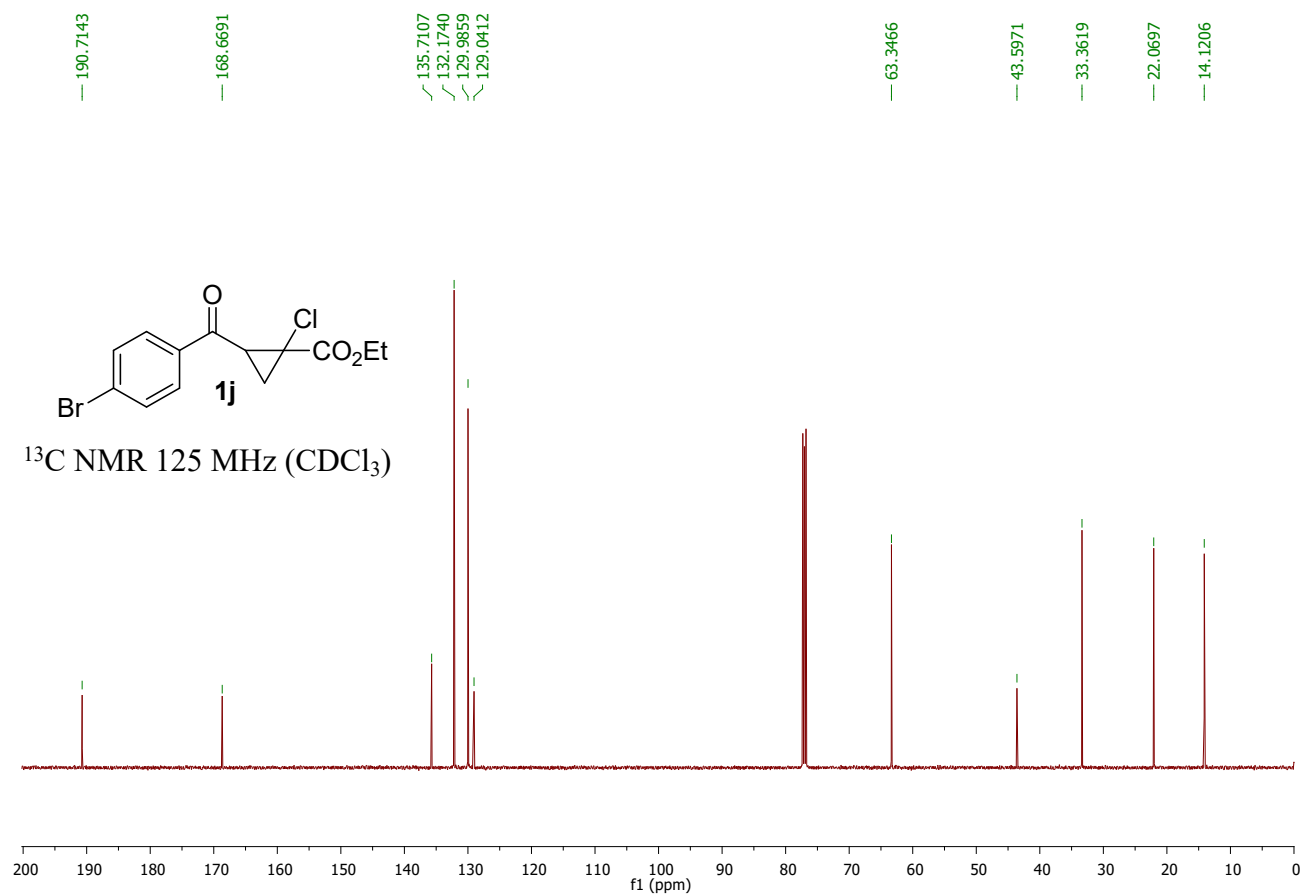

7.9189  
7.9019  
7.4763  
7.4594

4.3529  
4.3386  
4.3243  
4.3101

3.4966  
3.4808  
3.4785  
3.4627

2.2315  
2.2200  
2.2160  
2.2044  
2.0022  
1.9907  
1.9839  
1.9725  
1.3778  
1.3636  
1.3493

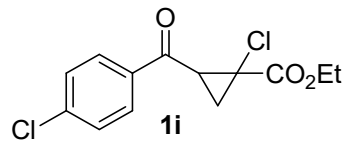

$^1\text{H}$  NMR 500 MHz ( $\text{CDCl}_3$ )

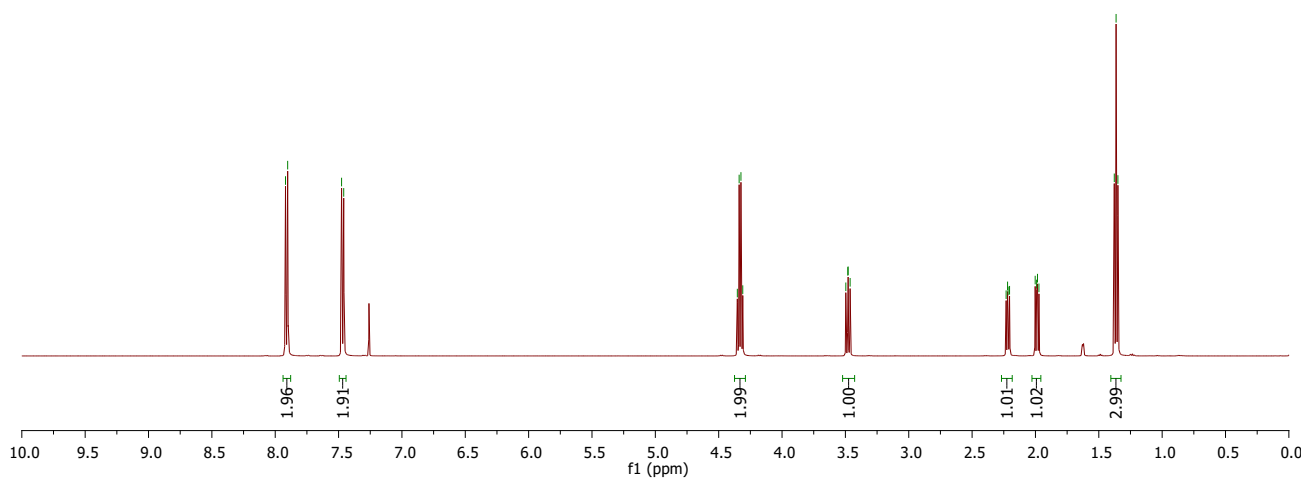

190.6129

168.7942

140.3864

135.4319

130.0241

129.2936

63.4557

43.7102

33.4988

22.1838

14.2354

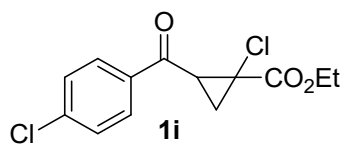

$^{13}\text{C}$  NMR 125 MHz ( $\text{CDCl}_3$ )

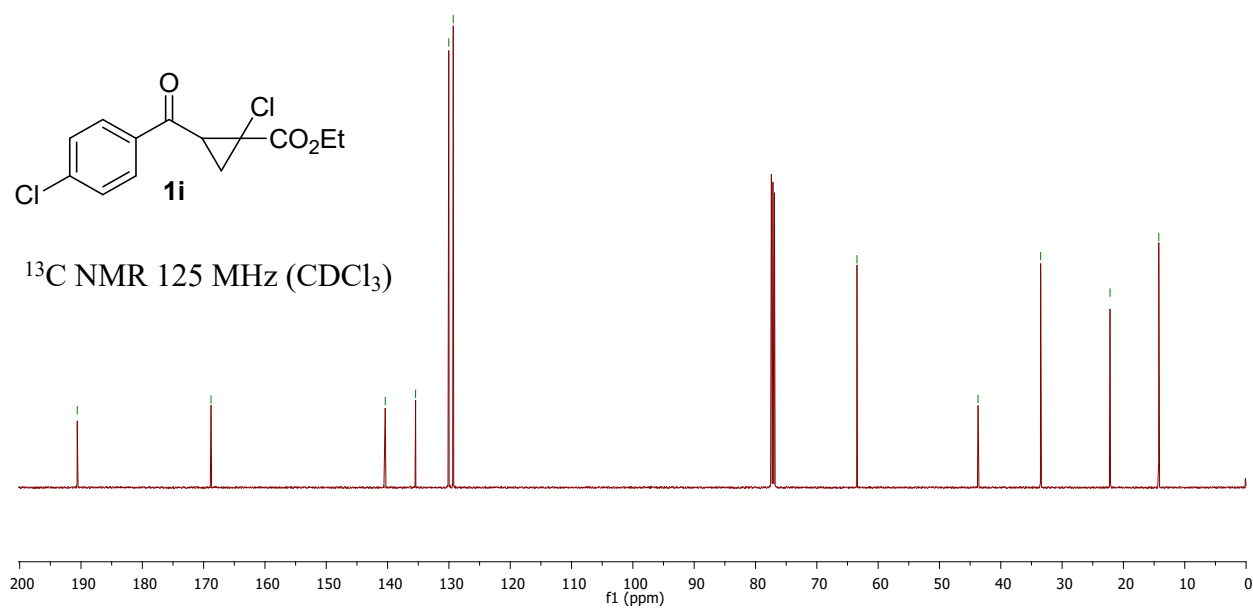

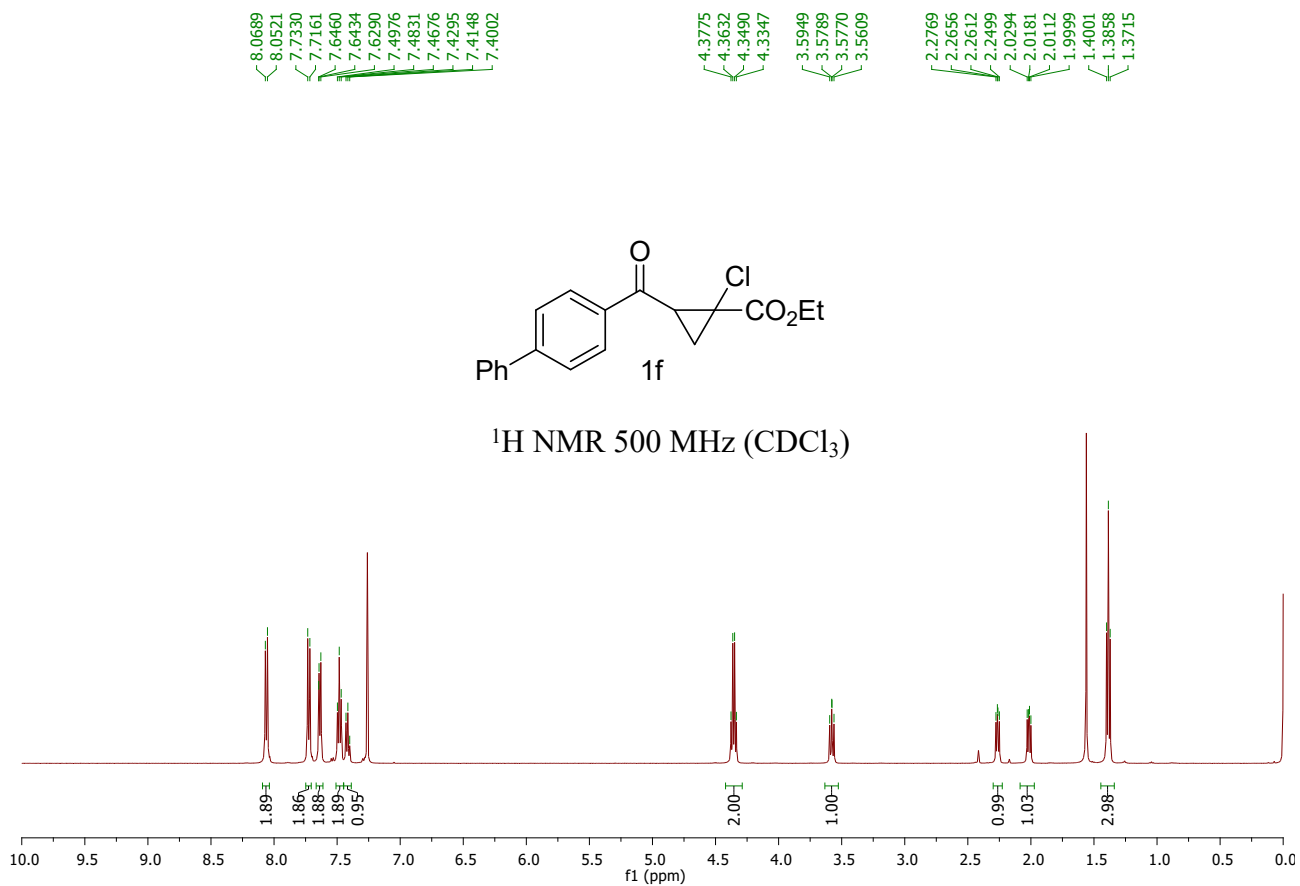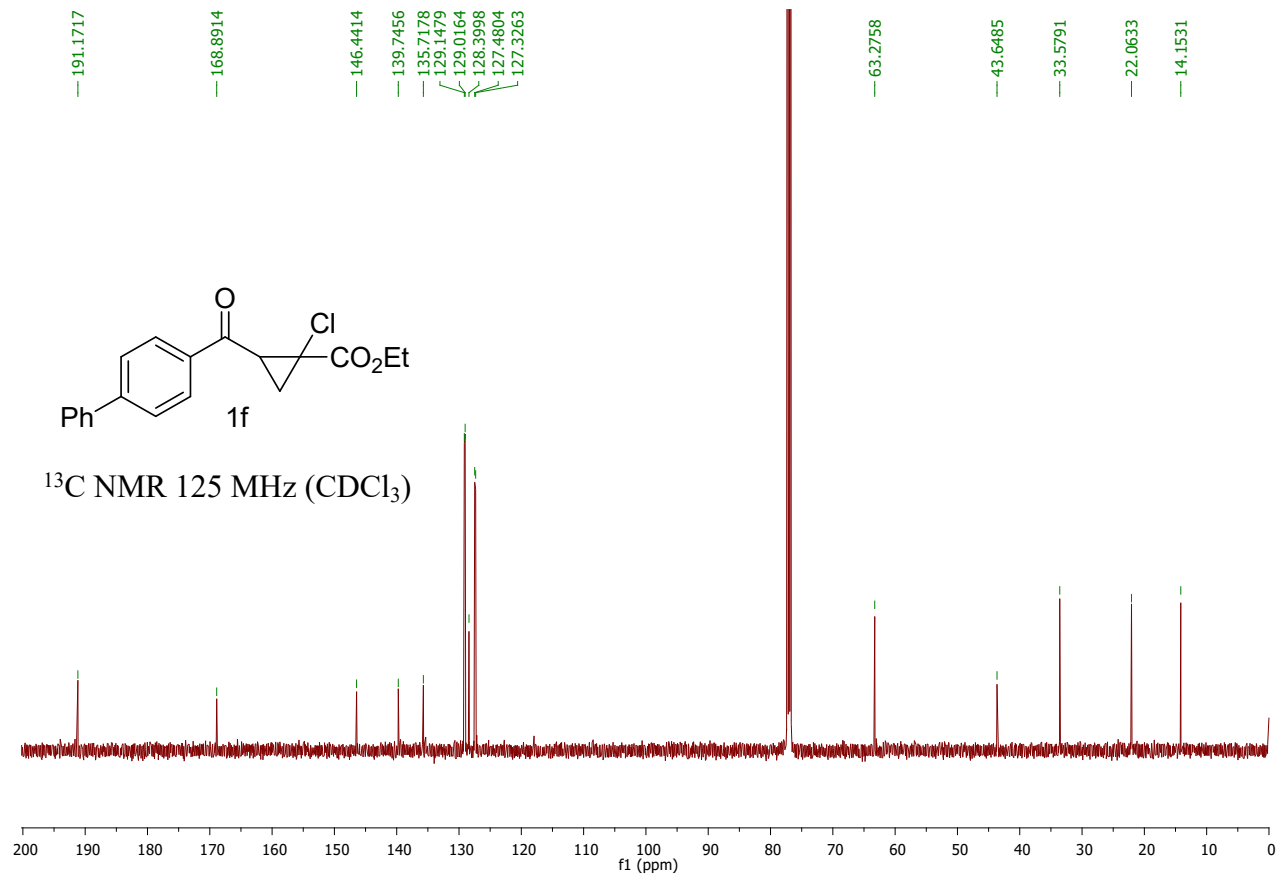

8.0151  
8.0109  
8.0044  
8.0007  
7.9974  
7.9909  
7.9867  
7.1852  
7.1795  
7.1755  
7.1623  
7.1492  
7.1451  
7.1394

4.3502  
4.3359  
4.3216  
4.3074

3.5009  
3.4851  
3.4828  
3.4669

2.2284  
2.2170  
2.2127  
2.2013  
1.9947  
1.9834  
1.9765  
1.9651  
1.3752  
1.3609  
1.3466

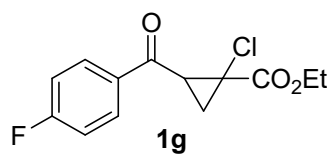

$^1\text{H}$  NMR 500 MHz ( $\text{CDCl}_3$ )

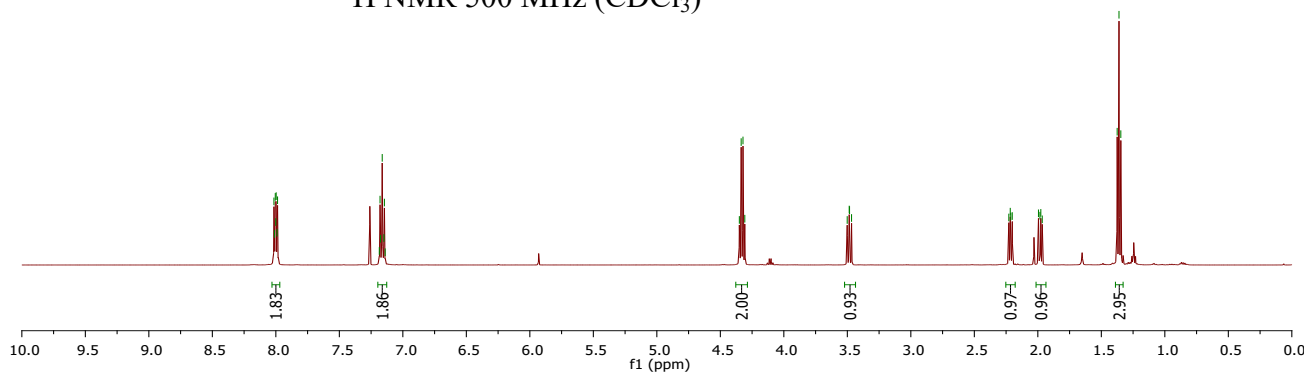

190.1701  
168.8332  
167.2391  
165.2029  
133.5943  
133.5707  
131.3660  
131.2914  
116.2051  
116.0300  
63.4230  
43.6616  
33.4806  
22.1384  
14.2249

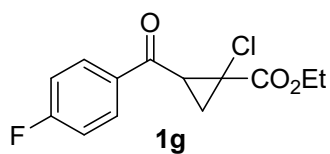

$^{13}\text{C}$  NMR 125 MHz ( $\text{CDCl}_3$ )

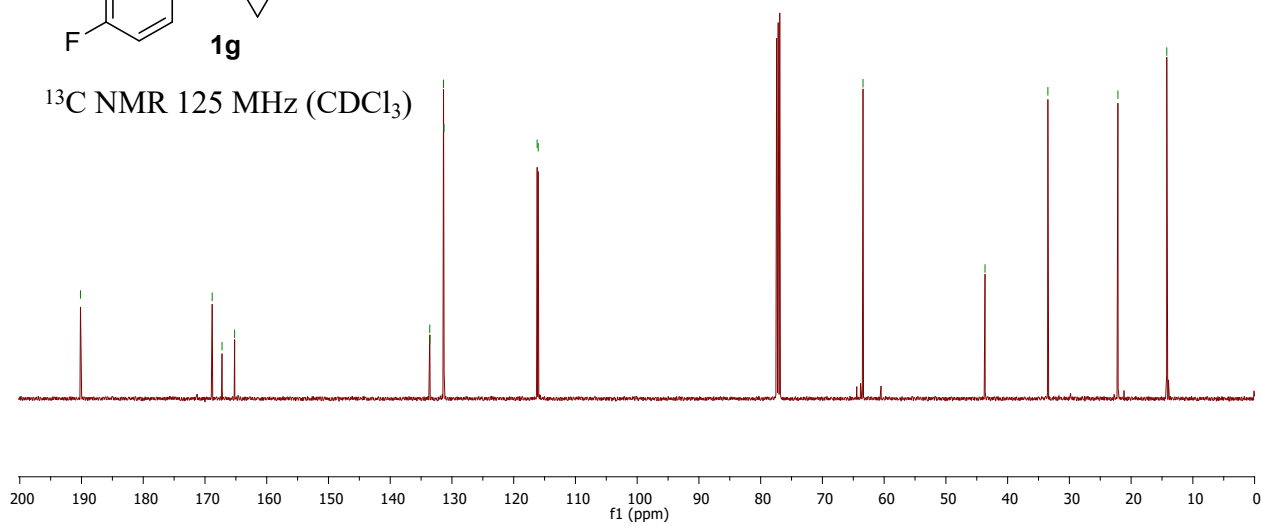

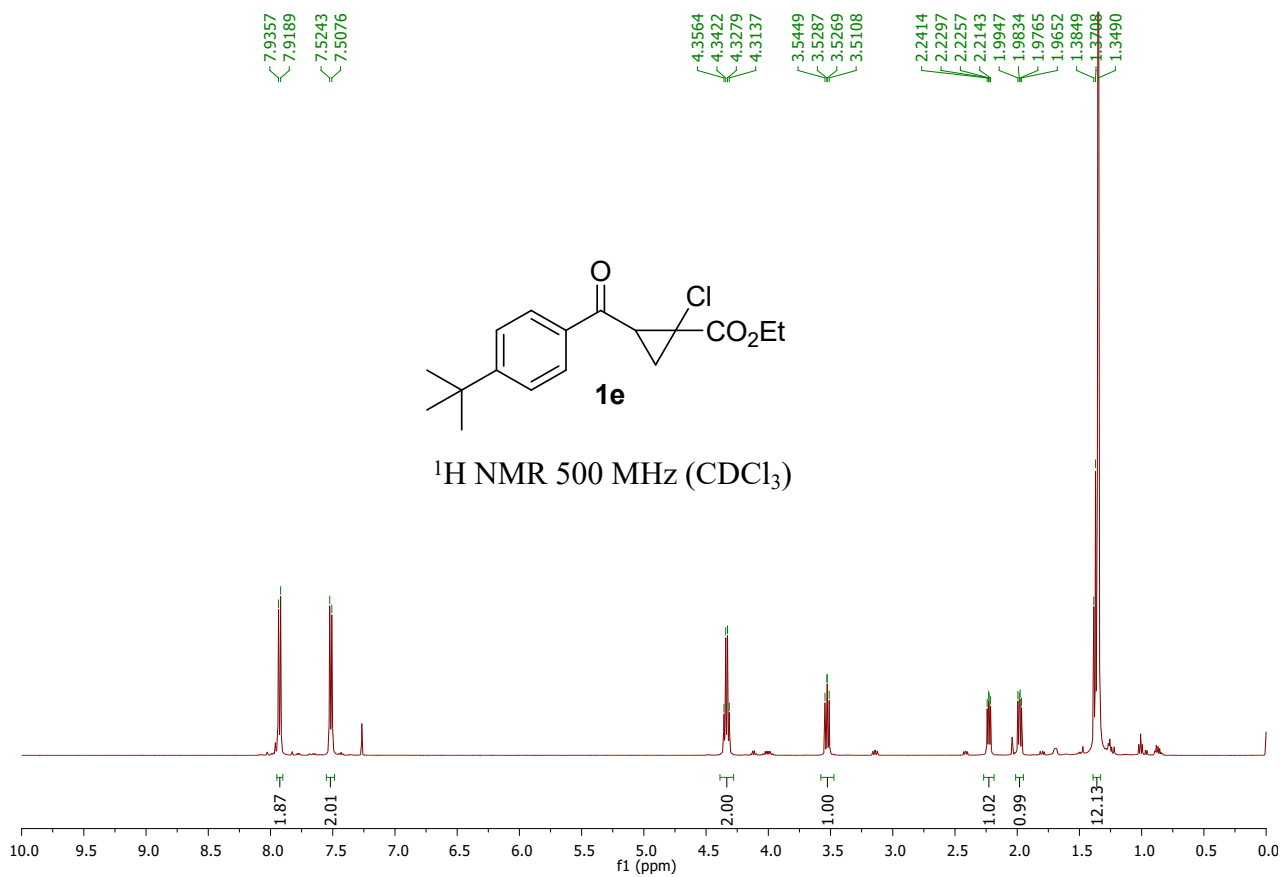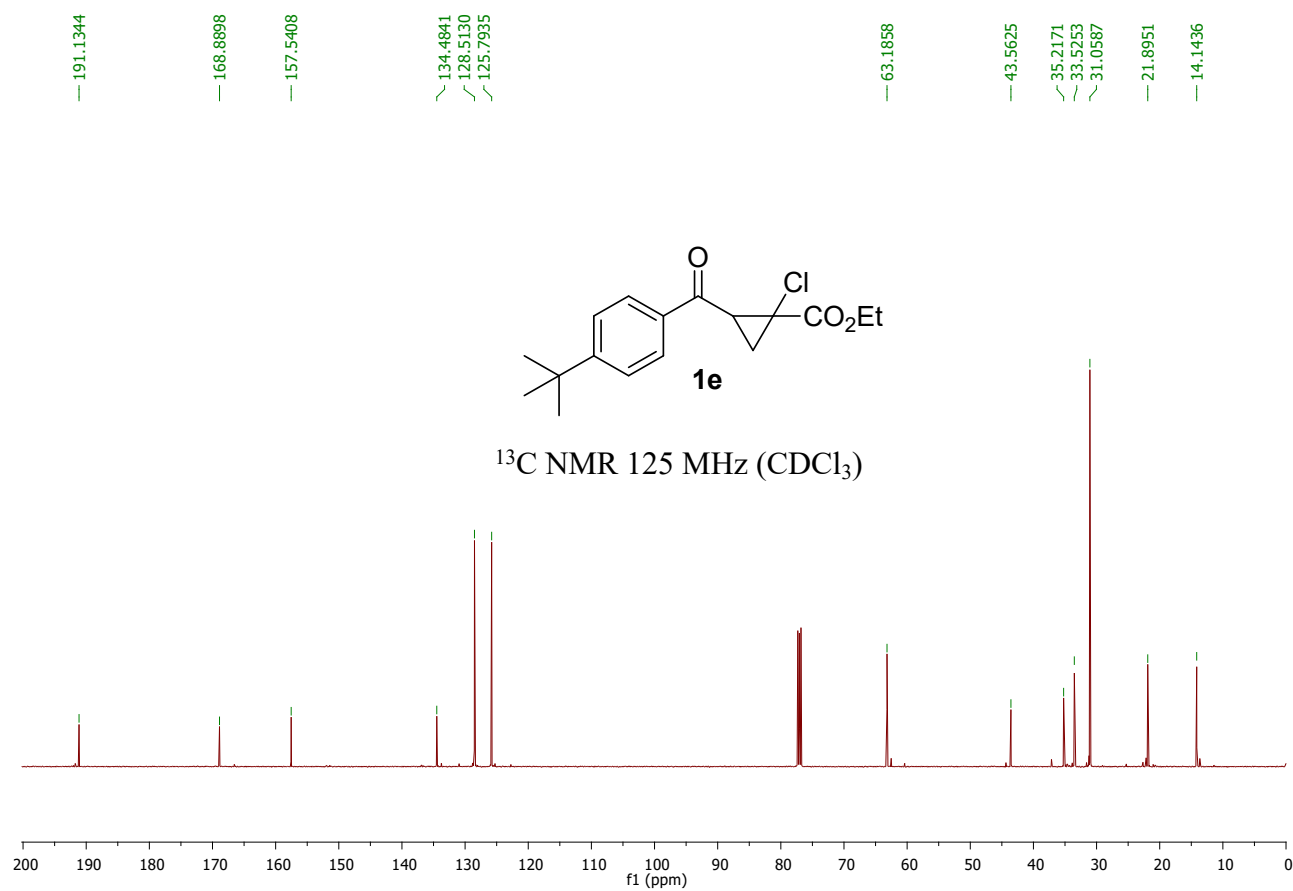

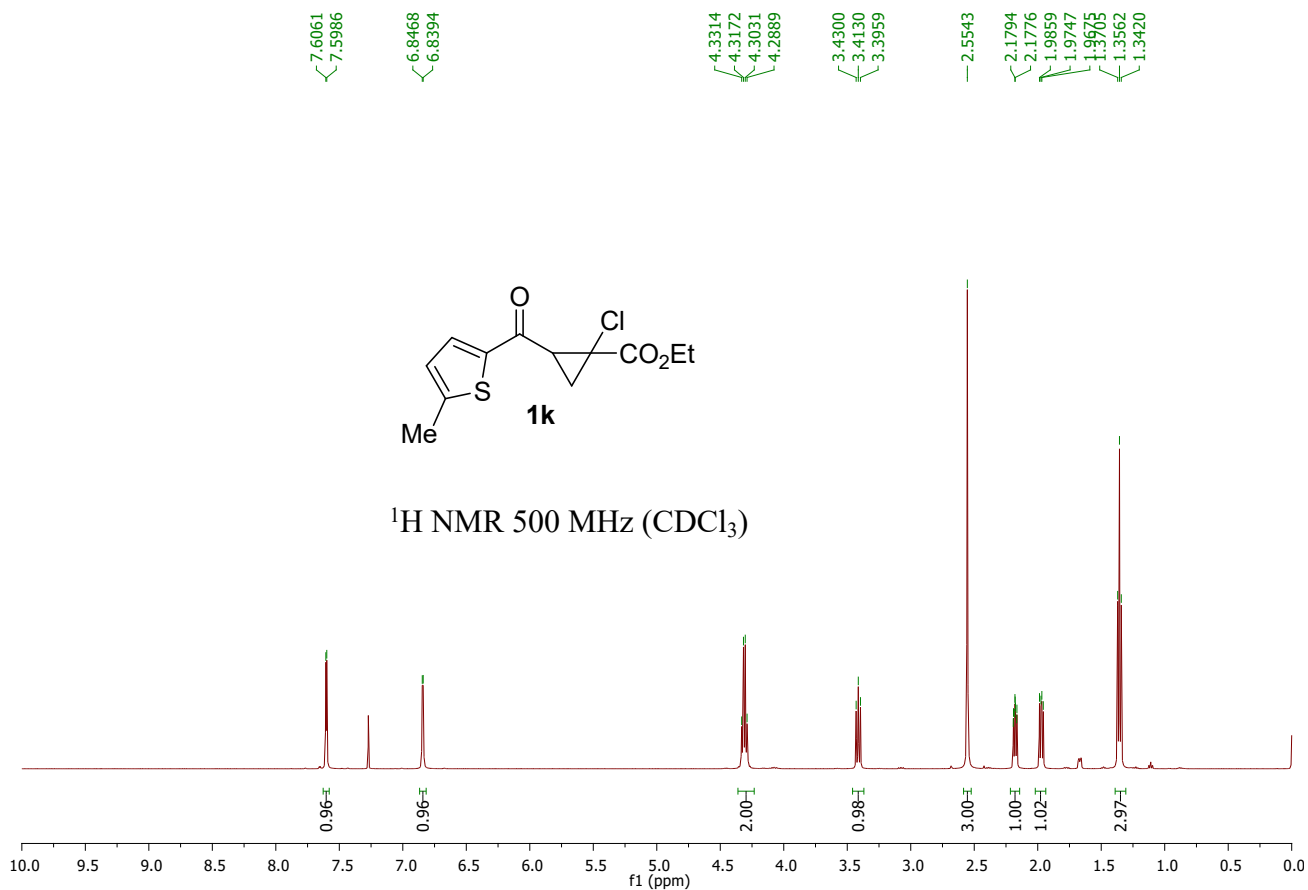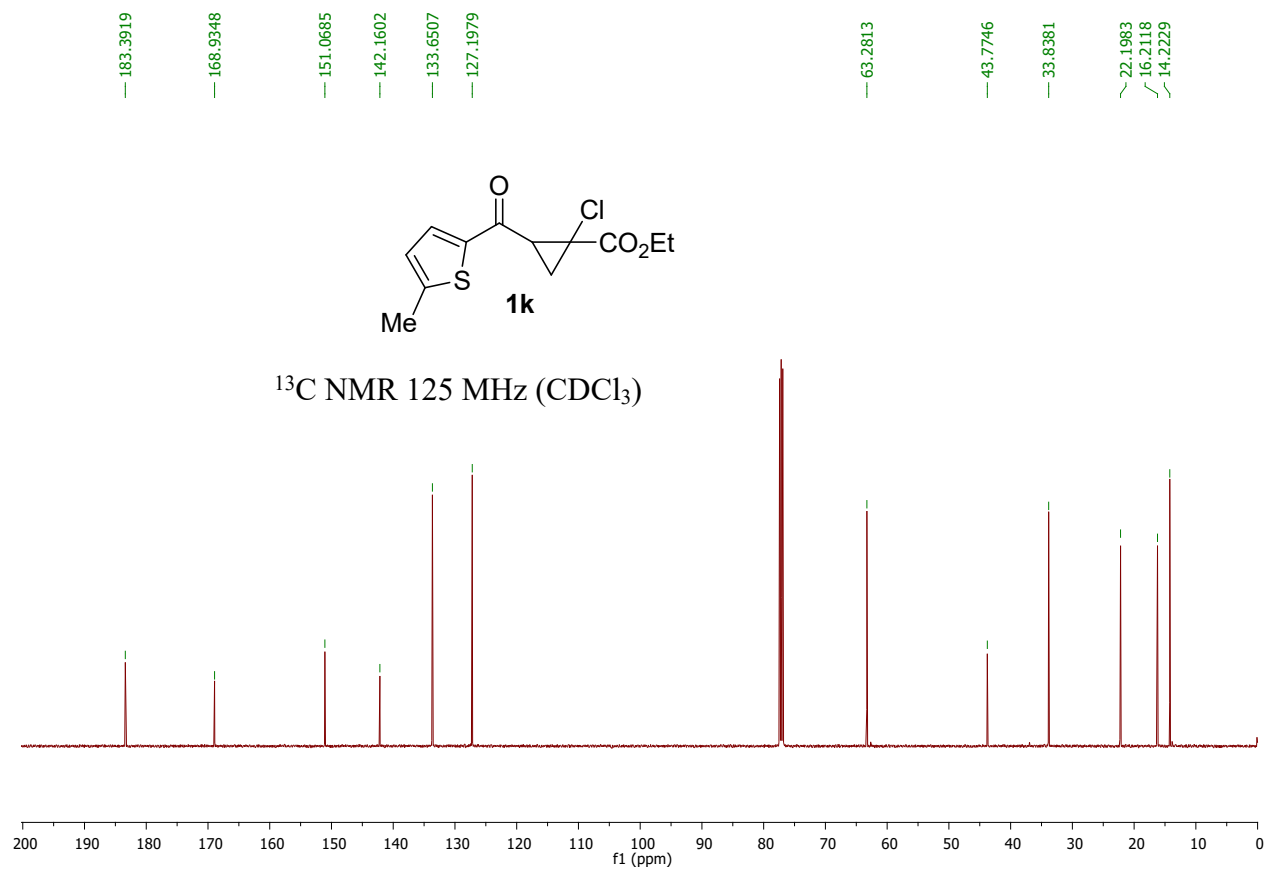

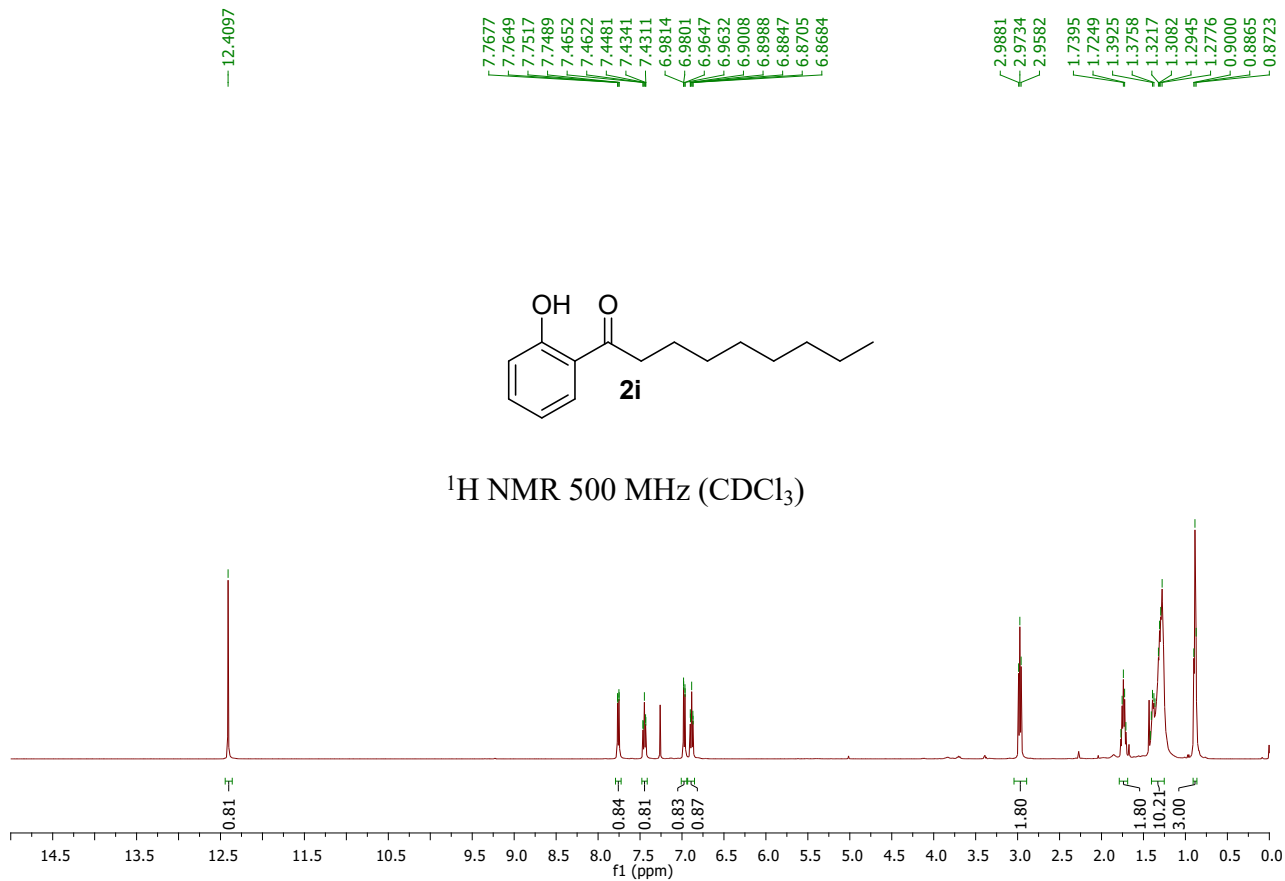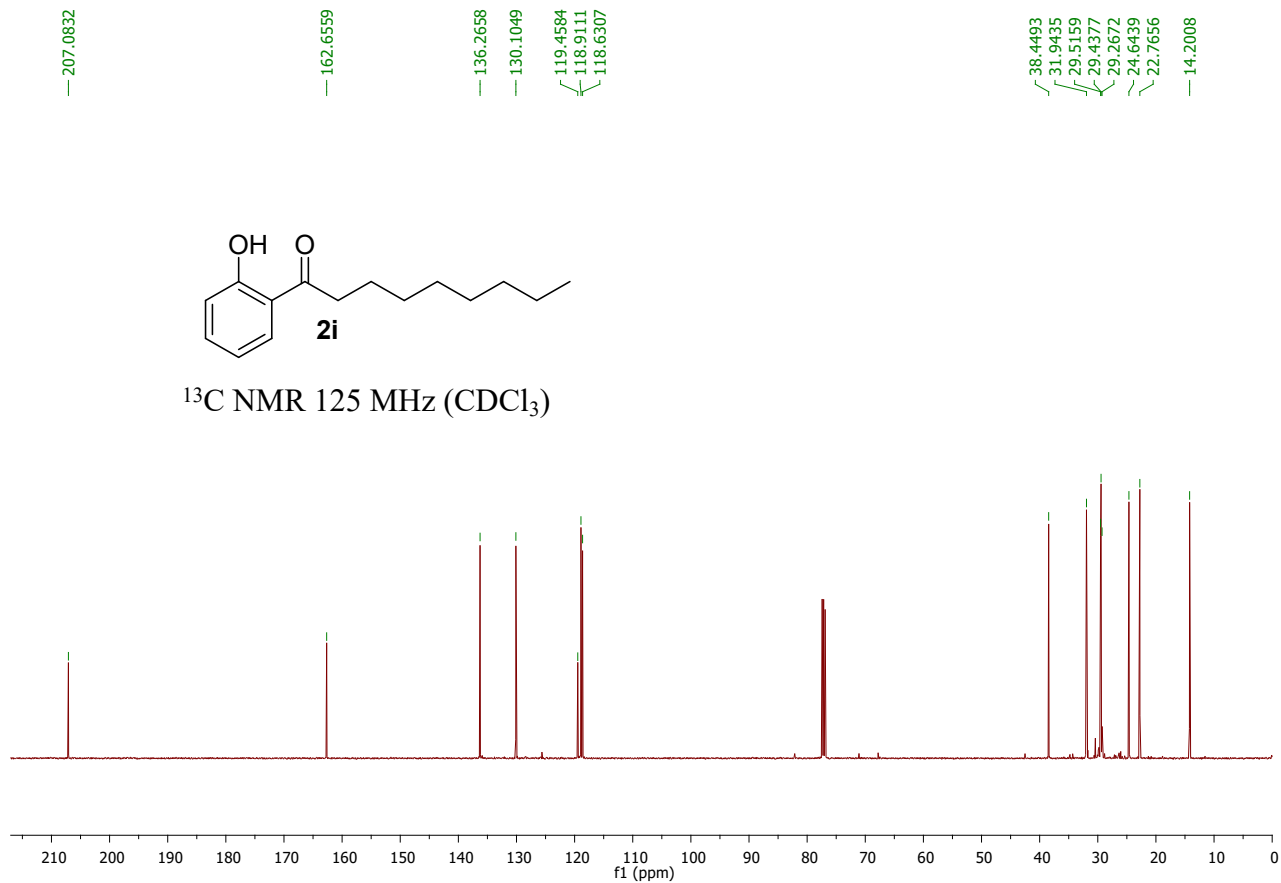



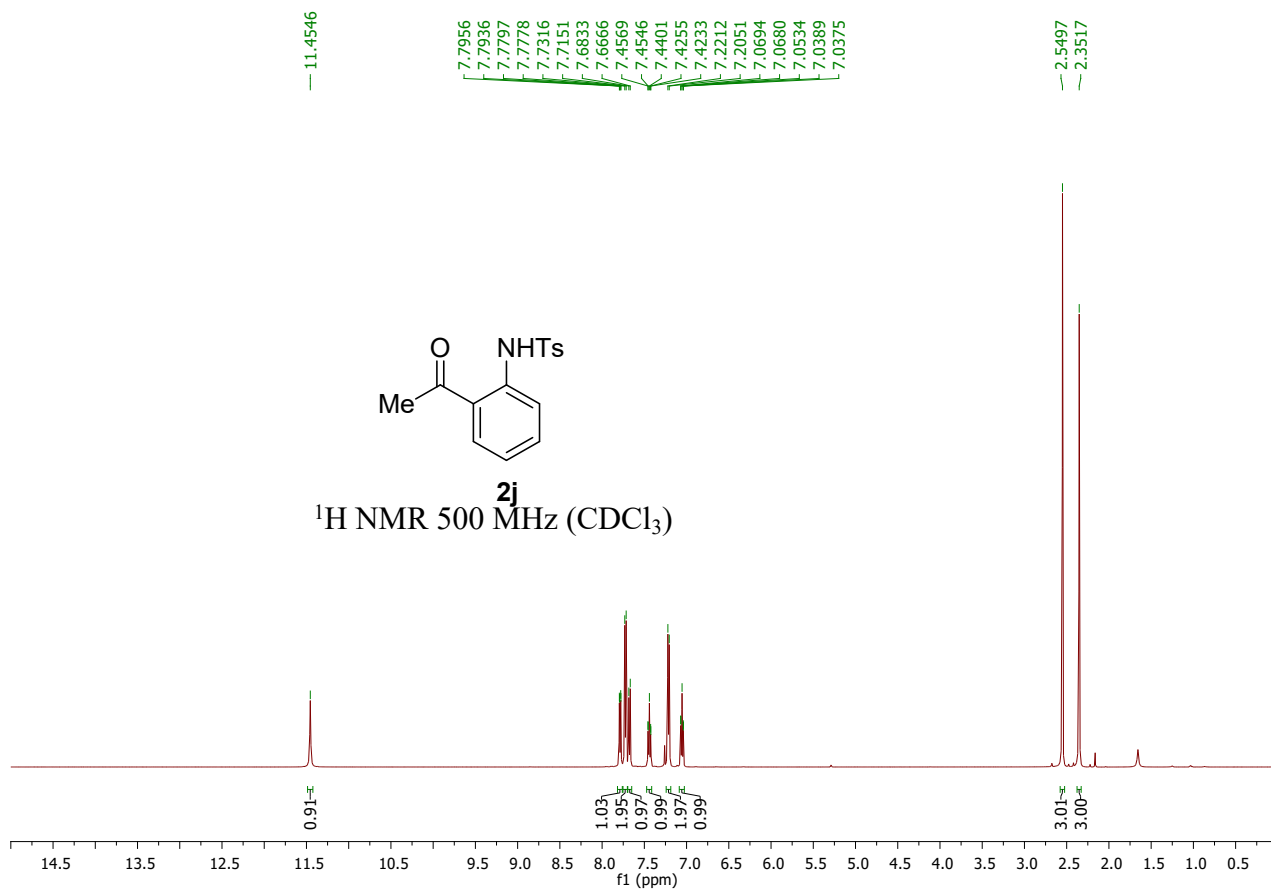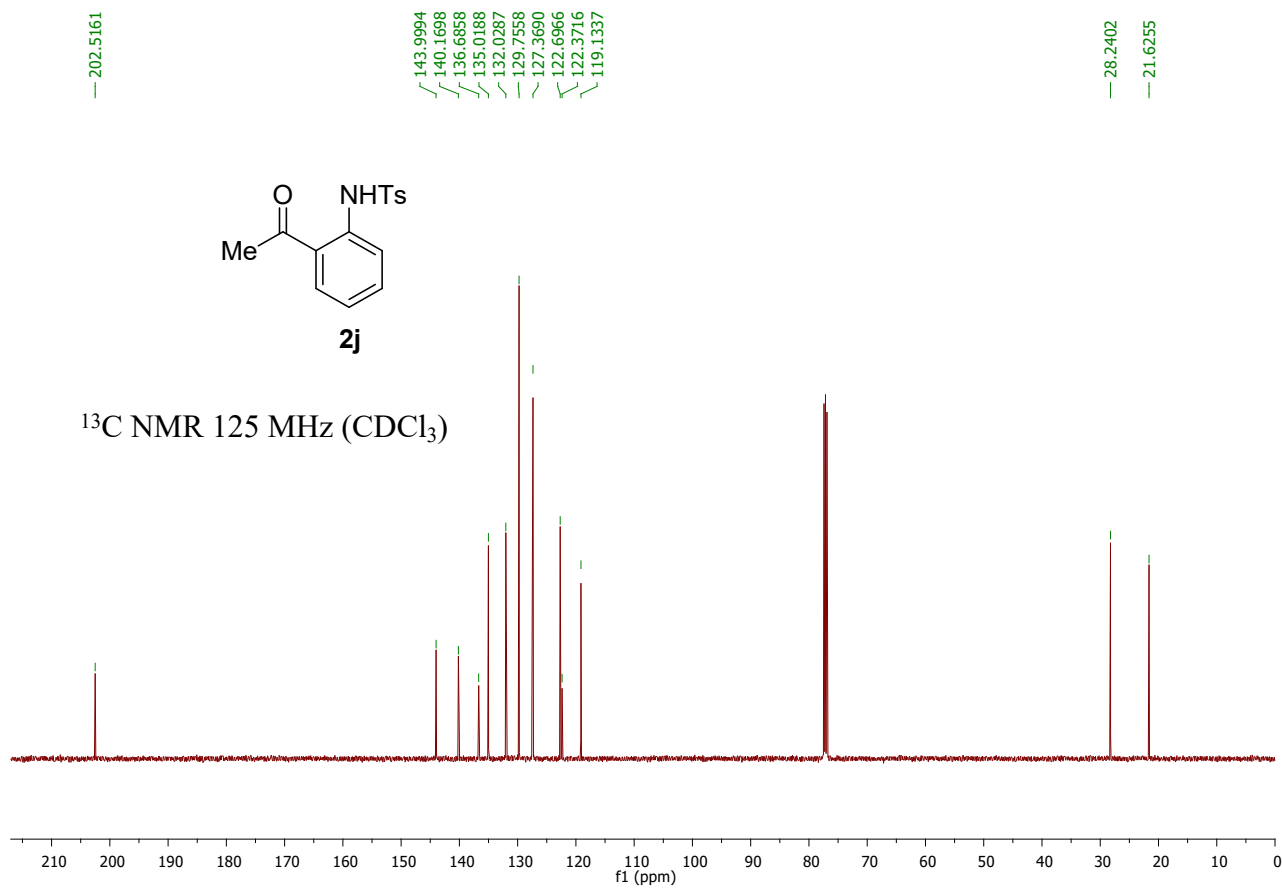

Supplement: d3ob00077j1.pdf [file d3ob00077j1.pdf]
